# Supplementary material for: Silver-catalysed trifluoromethylation of arenes at room temperature
Source: Royal Society of Chemistry journal article supplement (doi:10.1039/c3cc41829d), 2013-01-01

# Silver-catalysed trifluoromethylation of arenes at room temperature

Sangwon Seo,<sup>a</sup> John B. Taylor<sup>b</sup> and Michael F. Greaney<sup>\*a</sup>

## Supporting Information

|                                               |            |
|-----------------------------------------------|------------|
| <b>I: Experimental Procedures</b>             | <b>S1</b>  |
| <b>II: References</b>                         | <b>S9</b>  |
| <b>III: NMR Spectra of Isolated Compounds</b> | <b>S10</b> |

### I. Experimental Procedures

#### General Methods:

Melting points are uncorrected. <sup>1</sup>H, <sup>13</sup>C and <sup>19</sup>F NMR spectra were recorded on a Bruker Ava400 (400 MHz) instrument and calibrated to residual solvent peaks: proton (CDCl<sub>3</sub>: 7.26 ppm) and carbon (CDCl<sub>3</sub>: 77.0 ppm). <sup>19</sup>F NMR yields were determined using 4-fluoroanisole as internal standard (δ = -124.8 ppm). Data for <sup>1</sup>H and <sup>19</sup>F NMR are presented as follows: chemical shift (in ppm on the δ scale), multiplicity (bs = broad singlet, s = singlet, d = doublet, t = triplet, q = quartet, m = multiplet), the coupling constant (J, in Hertz) and integration. <sup>13</sup>C data are reported as the ppm on the δ scale followed by the interpretation and multiplicity where appropriate. Gas chromatography-mass spectrometry (GC/MS) was performed using Agilent 5975C Triple Axis GCMS (EI/CI). High Resolution Mass spectra were obtained from the EPSRC mass spectrometry service at the University of Swansea or from the analytical service at Syngenta, Jealott's Hill International Research Centre, UK. The data is recorded as the method followed by the calculated and measured masses. TLC was performed on Merck 60F<sub>254</sub> silica plates and visualised by UV light and potassium permanganate stains. The compounds were purified by flash chromatography using Aldrich silica gel (particle size 40-63 μm) under a positive pressure. The eluent is quoted as a percentage. Anhydrous DMSO used for the trifluoromethylation reaction was bought from Sigma-Aldrich and used as received. All other chemicals were purchased from a chemical supplier and used as received.

### Trifluoromethylation of electron-rich (hetero)arenes:

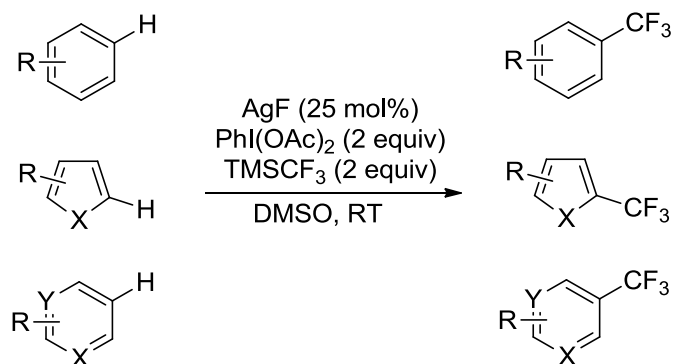

**Scheme S1.** Trifluoromethylation of electron rich (hetero)arenes.

**General procedure A:** An oven-dried reaction vial (5 mL) was charged with (hetero)arene **1** (0.3 mmol), (diacetoxyiodo)benzene (193.3 mg, 0.6 mmol), trimethyl(trifluoromethyl)silane (88.7  $\mu$ L, 0.6 mmol) and anhydrous DMSO (1 mL). The mixture was stirred at room temperature for 1 min and AgF (9.5 mg, 0.075 mmol) was slowly added to the stirring mixture. The vial was sealed with a septum cap and the reaction was kept stirring at the same temperature for 20 h. The resulting mixture was quenched with water (5 mL) and extracted with Et<sub>2</sub>O (3  $\times$  5 mL). The combined organic layers were dried over MgSO<sub>4</sub>, filtered and concentrated under reduced pressure. The crude material was purified by column chromatography (SiO<sub>2</sub>, using the noted solvent mixture) to yield the desired trifluoromethylated product **2**. For volatile compounds, 4-fluoroanisole (3 equiv) was added as an internal standard to the crude, and the reaction was analysed by <sup>19</sup>F NMR spectroscopy in CDCl<sub>3</sub>. The identity of the products was further confirmed by <sup>1</sup>H NMR of the crude mixture (and GC/MS analysis for unknown compounds).

### Trifluoromethylation of unactivated arenes (**1p**, **1q** and **1r**):

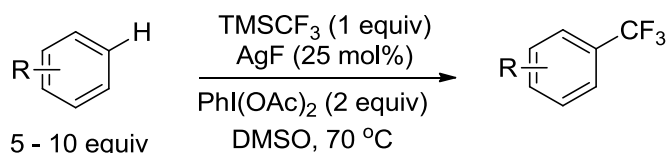

**Scheme S2.** Trifluoromethylation of unactivated arenes.

**General procedure B:** An oven-dried reaction vial (5 mL) was charged with trimethyl(trifluoromethyl)silane (73.9  $\mu$ L, 0.5 mmol), arene (2.5 mmol (**1r**) or 5.0 mmol (**1p** and **1q**)), (diacetoxyiodo)benzene (322.1 mg, 1.0 mmol), AgF (15.9 mg, 0.125 mmol) and anhydrous DMSO (0.5 mL). The vial was sealed with a septum cap and the reaction was heated at 70 °C for 20 h. The resulting mixture was quenched with water (5 mL) and extracted with Et<sub>2</sub>O (3  $\times$  5 mL). The combined organic layers were dried over MgSO<sub>4</sub>, filtered and concentrated under reduced pressure. 4-Fluoroanisole (3 equiv) was added as an internal standard to the crude, and the reaction was analysed by <sup>19</sup>F NMR spectroscopy in CDCl<sub>3</sub>.

### 1,4-Dimethoxy-2-(trifluoromethyl)benzene (**2a**)<sup>1</sup>

Prepared following general procedure A using 1,4-dimethoxybenzene (41.4 mg, 0.3 mmol). The reaction mixture was purified by flash chromatography using 20% DCM in pentane to afford **2a** as a colourless oil (Yield = 58%). <sup>1</sup>H NMR (400 MHz, CDCl<sub>3</sub>):  $\delta$  7.12 (d, *J* = 3.1 Hz, 1H), 7.02 (dd, *J* = 9.1, 3.0 Hz, 1H), 6.94 (d, *J* = 9.0 Hz, 1H), 3.86 (s, 3H), 3.79 (s, 3H); <sup>13</sup>C NMR (100 MHz, CDCl<sub>3</sub>):  $\delta$  152.9 (C), 151.5 (C), 123.4 (q, *J*<sub>C-F</sub> = 272.4 Hz, CF<sub>3</sub>), 119.4 (q, *J*<sub>C-F</sub> = 31.1 Hz, C), 118.1 (CH), 113.5 (CH), 112.8 (q, *J*<sub>C-F</sub> = 5.5 Hz, CH), 56.5 (CH<sub>3</sub>), 55.9 (CH<sub>3</sub>); <sup>19</sup>F NMR (376 MHz, CDCl<sub>3</sub>):  $\delta$  -62.4 (s, CF<sub>3</sub>).

### 1,3-Dimethoxy-4-(trifluoromethyl)benzene (**2b**)<sup>1</sup> and 1,3-dimethoxy-2-(trifluoromethyl)benzene (**2b**<sup>\*</sup>)<sup>1</sup>

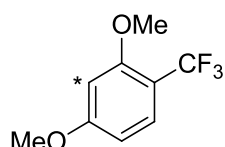

Prepared following general procedure A using 1,3-dimethoxybenzene (41.4 mg (39.3  $\mu$ L), 0.3 mmol). The reaction mixture was purified by flash chromatography using 20% DCM in pentane to afford **2b** as a mixture of isomers as a colourless oil (Yield = 77%, **1b**:**1b**<sup>\*</sup> = 2:1). **1,3-Dimethoxy-4-(trifluoromethyl)benzene**: <sup>1</sup>H NMR (400 MHz, CDCl<sub>3</sub>):  $\delta$  7.47 (d, J = 8.6 Hz, 1H), 6.52 (s, 1H), 6.48 (d, J = 8.6 Hz, 1H), 3.87 (s, 3H), 3.84 (s, 3H); <sup>13</sup>C NMR (100 MHz, CDCl<sub>3</sub>):  $\delta$  163.6 (C), 158.8 (C), 128.2 (q, J<sub>C-F</sub> = 5.4 Hz, CH), 124.0 (q, J<sub>C-F</sub> = 271.2 Hz, CF<sub>3</sub>), 111.6 (q, J<sub>C-F</sub> = 31.3 Hz, C), 103.7 (CH), 99.3 (CH), 55.8 (CH<sub>3</sub>), 55.5 (CH<sub>3</sub>); <sup>19</sup>F NMR (376 MHz, CDCl<sub>3</sub>):  $\delta$  -61.3 (s, CF<sub>3</sub>); **1,3-Dimethoxy-2-(trifluoromethyl)benzene**: <sup>1</sup>H NMR (400 MHz, CDCl<sub>3</sub>):  $\delta$  7.38 (t, J = 8.4 Hz, 1H), 6.61 (d, J = 8.5 Hz, 2H), 3.86 (s, 6H); <sup>13</sup>C NMR (100 MHz, CDCl<sub>3</sub>):  $\delta$  159.3 (C), 133.0 (CH), 124.1 (q, J<sub>C-F</sub> = 274.5 Hz, CF<sub>3</sub>), 107.1 (q, J<sub>C-F</sub> = 29.5 Hz, C), 104.8 (CH), 56.3 (CH<sub>3</sub>); <sup>19</sup>F NMR (376 MHz, CDCl<sub>3</sub>):  $\delta$  -54.9 (s, CF<sub>3</sub>).

### 1,2-dimethoxy-4-(trifluoromethyl)benzene (**2c**)<sup>1</sup>

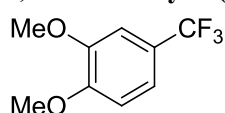

Prepared following general procedure A using 1,2-dimethoxybenzene (41.4 mg (38.2  $\mu$ L), 0.3 mmol). The reaction mixture was purified by flash chromatography using 30% DCM in pentane to afford **2c** as a colourless oil (Yield = 55%). <sup>1</sup>H NMR (400 MHz, CDCl<sub>3</sub>):  $\delta$  7.21 (ddd, J = 8.4, 2.0, 0.8 Hz, 1H), 7.07 (d, J = 2.0 Hz, 1H), 6.91 (d, J = 8.4 Hz, 1H), 3.92 (s, 3H), 3.91 (s, 3H); <sup>13</sup>C NMR (100 MHz, CDCl<sub>3</sub>):  $\delta$  151.6 (C), 149.0 (C), 124.3 (q, J<sub>C-F</sub> = 271.3 Hz, CF<sub>3</sub>), 122.9 (q, J<sub>C-F</sub> = 32.7 Hz, C), 118.3 (q, J<sub>C-F</sub> = 4.2 Hz, CH), 110.6 (CH), 108.0 (q, J<sub>C-F</sub> = 3.4 Hz, CH), 56.0 (CH<sub>3</sub>); <sup>19</sup>F NMR (376 MHz, CDCl<sub>3</sub>):  $\delta$  -61.5 (s, CF<sub>3</sub>).

### 3,4-Dimethyl-2-(trifluoromethyl)anisole (**2d**) and 3,4-dimethyl-6-(trifluoromethyl)anisole (**2d**<sup>\*</sup>)

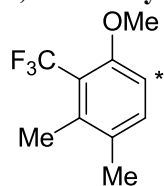

Prepared following general procedure A using 3,4-dimethylanisole (40.9 mg (41.9  $\mu$ L), 0.3 mmol). The reaction mixture was purified by flash chromatography using 100% pentane to afford **2d** and **2d**<sup>\*</sup> as colourless oils (Yield = 45%, **2d**:**2d**<sup>\*</sup> = 1:1). **3,4-Dimethyl-2-(trifluoromethyl)anisole**: <sup>1</sup>H NMR (400 MHz, CDCl<sub>3</sub>):  $\delta$  7.23 (d, J = 8.5 Hz, 1H), 6.77 (d, J = 8.5 Hz, 1H), 3.84 (s, 3H), 2.36 (q, J<sub>H-F</sub> = 2.9 Hz, 3H), 2.26 (s, 3H); <sup>13</sup>C NMR (100 MHz, CDCl<sub>3</sub>):  $\delta$  156.8 (C), 137.3 (q, J<sub>C-F</sub> = 1.5 Hz, C), 133.5 (CH), 130.0 (C), 125.2 (q, J<sub>C-F</sub> = 275.9 Hz, CF<sub>3</sub>), 117.7 (q, J<sub>C-F</sub> = 28.1 Hz, C), 110.0 (CH), 56.3 (CH<sub>3</sub>), 20.3 (CH<sub>3</sub>), 16.7 (q, J<sub>C-F</sub> = 4.6 Hz, CH<sub>3</sub>); <sup>19</sup>F NMR (376 MHz, CDCl<sub>3</sub>):  $\delta$  -53.5 (s, CF<sub>3</sub>); HRMS (ES<sup>+</sup>) cald. for (M+H)<sup>+</sup> C<sub>10</sub>H<sub>12</sub>O<sub>1</sub>F<sub>3</sub>: 205.0835, found: 205.0835; **3,4-Dimethyl-6-(trifluoromethyl)anisole**: <sup>1</sup>H NMR (400 MHz, CDCl<sub>3</sub>):  $\delta$  7.30 (s, 1H), 6.79 (s, 1H), 3.87 (s, 3H), 2.30 (s, 3H), 2.22 (s, 3H); <sup>13</sup>C NMR (100 MHz, CDCl<sub>3</sub>):  $\delta$  155.4 (C), 142.1 (C), 128.0 (C), 127.8 (q, J<sub>C-F</sub> = 5.1 Hz, CH), 123.9 (q, J<sub>C-F</sub> = 271.8 Hz, CF<sub>3</sub>), 115.9 (q, J<sub>C-F</sub> = 30.5 Hz, C), 113.6 (CH), 56.0 (CH<sub>3</sub>), 20.3 (CH<sub>3</sub>), 18.7 (CH<sub>3</sub>); <sup>19</sup>F NMR (376 MHz, CDCl<sub>3</sub>):  $\delta$  -61.7 (s, CF<sub>3</sub>); HRMS (ES<sup>+</sup>) cald. for (M+H)<sup>+</sup> C<sub>10</sub>H<sub>12</sub>O<sub>1</sub>F<sub>3</sub>: 205.0835, found: 205.0835.

### 1,3,5-Trimethoxy-4-(trifluoromethyl)benzene (**2e**)

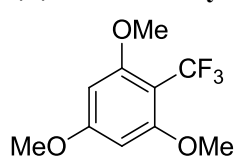

Prepared following general procedure A using 1,3,5-trimethoxybenzene (50.5 mg, 0.3 mmol). The reaction mixture was purified by flash chromatography using 20% Et<sub>2</sub>O in pentane to afford **2e** as a white solid (Yield = 89%). Mp = 52 – 54 °C; <sup>1</sup>H NMR (400 MHz, CDCl<sub>3</sub>):  $\delta$  6.13 (s, 2H), 3.84 (s, 9H); <sup>13</sup>C NMR (100 MHz, CDCl<sub>3</sub>):  $\delta$  163.5 (C), 160.4 (C), 124.3 (q, J<sub>C-F</sub> = 273.4 Hz, CF<sub>3</sub>), 100.3 (q, J<sub>C-F</sub> = 30.0 Hz, C), 91.2 (CH), 56.2 (CH<sub>3</sub>), 55.3 (CH<sub>3</sub>); <sup>19</sup>F NMR (376 MHz, CDCl<sub>3</sub>):  $\delta$  -54.1 (s, CF<sub>3</sub>); HRMS (ES<sup>+</sup>) cald. for (M+H)<sup>+</sup> C<sub>10</sub>H<sub>12</sub>O<sub>3</sub>F<sub>3</sub>: 237.0733, found: 237.0736.

### 1-Chloro-3,5-dimethoxy-2-(trifluoromethyl)benzene (**2f**) and 1-chloro-3,5-dimethoxy-4-(trifluoromethyl)benzene (**2f**<sup>\*</sup>)

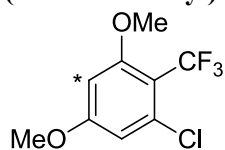

Prepared following general procedure A using 1-chloro-3,5-dimethoxybenzene (51.8 mg, 0.3 mmol). The reaction mixture was purified by flash chromatography using 10% DCM in pentane to afford **2f** (major) as a colourless oil and **2f**<sup>\*</sup> as a white solid (Yield = 83%, **2f**:**2f**<sup>\*</sup> = 2:1). **1-Chloro-3,5-dimethoxy-2-(trifluoromethyl)benzene**: <sup>1</sup>H NMR (400 MHz, CDCl<sub>3</sub>):  $\delta$  6.57 (d, J = 2.4 Hz, 1H), 6.41 (d, J = 2.0 Hz, 1H), 3.85 (s, 3H), 3.82 (s, 3H); <sup>13</sup>C NMR (100 MHz, CDCl<sub>3</sub>):  $\delta$  162.3 (C), 160.5 (C), 134.8 (q, J<sub>C-F</sub> = 1.8 Hz, C), 123.5 (q, J<sub>C-F</sub> = 273.9 Hz, CF<sub>3</sub>), 109.8 (q, J<sub>C-F</sub> = 30.5 Hz, C), 108.2 (CH), 98.4 (CH), 56.4 (CH<sub>3</sub>), 55.6 (CH<sub>3</sub>); <sup>19</sup>F NMR

(376 MHz, CDCl<sub>3</sub>): δ -54.5 (s, CF<sub>3</sub>); HRMS (ES<sup>+</sup>) cald. for (M+H)<sup>+</sup> C<sub>9</sub>H<sub>9</sub>O<sub>2</sub>ClF<sub>3</sub>: 241.0238, found: 241.0242; **1-Chloro-3,5-dimethoxy-4-(trifluoromethyl)benzene**: Mp = 70 – 72 °C; <sup>1</sup>H NMR (400 MHz, CDCl<sub>3</sub>): δ 6.61 (s, 2H), 3.85 (s, 6H); <sup>13</sup>C NMR (100 MHz, CDCl<sub>3</sub>): δ 159.6 (C), 139.1 (C), 123.7 (q, J<sub>C-F</sub> = 274.7 Hz, CF<sub>3</sub>), 105.8 (q, J<sub>C-F</sub> = 30.0 Hz, C), 105.6 (CH), 56.5 (CH<sub>3</sub>); <sup>19</sup>F NMR (376 MHz, CDCl<sub>3</sub>): δ -55.1 (s, CF<sub>3</sub>); HRMS (ES<sup>+</sup>) cald. for (M+H)<sup>+</sup> C<sub>9</sub>H<sub>9</sub>O<sub>2</sub>ClF<sub>3</sub>: 241.0238, found: 241.0242.

#### 1-Bromo-2,4-dimethoxy-5-(trifluoromethyl)benzene (2g)

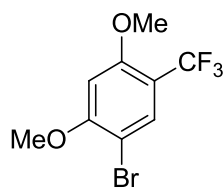

Prepared following general procedure A using 1-bromo-2,4-dimethoxybenzene (65.1 mg, 0.3 mmol). The reaction mixture was purified by flash chromatography using 50% Et<sub>2</sub>O in iso-hexane to afford **2g** as a white solid (Yield = 40%). Mp = 130 – 133 °C; <sup>1</sup>H NMR (400 MHz, CDCl<sub>3</sub>): δ 7.69 (s, 1H), 6.51 (s, 1H), 3.94 (s, 3H), 3.91 (s, 1H); <sup>13</sup>C NMR (100 MHz, CDCl<sub>3</sub>): δ 159.4 (C), 158.3 (q, J<sub>C-F</sub> = 2.3 Hz, C), 131.3 (q, J<sub>C-F</sub> = 5.4 Hz, CH), 123.0 (q, J<sub>C-F</sub> = 271.5 Hz, CF<sub>3</sub>), 112.2 (q, J<sub>C-F</sub> = 32.0 Hz, C), 101.1 (C), 96.7 (CH), 56.4 (CH<sub>3</sub>), 56.2 (CH<sub>3</sub>); <sup>19</sup>F NMR (376 MHz, CDCl<sub>3</sub>): δ -61.5 (s, CF<sub>3</sub>). HRMS (ES<sup>+</sup>) cald. for (M+H)<sup>+</sup> C<sub>9</sub>H<sub>9</sub>O<sub>2</sub>BrF<sub>3</sub>: 284.9733, found: 284.9741.

#### 1-Bromo-3,4,5-trimethoxy-2-(trifluoromethyl)benzene (2h)

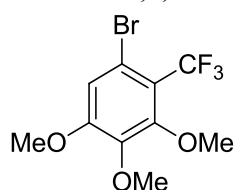

Prepared following general procedure A using 1-bromo-3,4,5-trimethoxybenzene (74.1 mg, 0.3 mmol). The reaction mixture was purified by flash chromatography using 40% DCM in pentane to afford **2h** as a yellow oil (Yield = 55%). <sup>1</sup>H NMR (400 MHz, CDCl<sub>3</sub>): δ 6.98 (s, 1H), 3.91 (s, 3H), 3.89 (s, 3H), 3.86 (s, 3H); <sup>13</sup>C NMR (100 MHz, CDCl<sub>3</sub>): δ 155.8 (C), 154.3 (C), 142.6 (C), 122.9 (q, J<sub>C-F</sub> = 274.6 Hz, CF<sub>3</sub>), 116.9 (q, J<sub>C-F</sub> = 29.8 Hz, C), 114.2 (CH), 114.1 (q, J<sub>C-F</sub> = 2.1 Hz, C), 62.1 (CH<sub>3</sub>), 60.8 (CH<sub>3</sub>), 56.2 (CH<sub>3</sub>); <sup>19</sup>F NMR (376 MHz, CDCl<sub>3</sub>): δ -55.5 (s, CF<sub>3</sub>); HRMS (ES<sup>+</sup>) cald. for (M+H)<sup>+</sup> C<sub>10</sub>H<sub>11</sub>O<sub>3</sub>BrF<sub>3</sub>: 314.9838, found: 314.9837.

#### 1-Iodo-3,4,5-trimethoxy-2-(trifluoromethyl)benzene (2i)

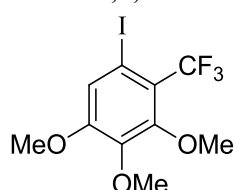

Prepared following general procedure A using 1-iodo-3,4,5-trimethoxybenzene (88.2 mg, 0.3 mmol). The reaction mixture was purified by flash chromatography using 40% DCM in pentane to afford **2i** (as a mixture with a small amount of an inseparable impurity) as a yellow oil (Yield = 51%). <sup>1</sup>H NMR (400 MHz, CDCl<sub>3</sub>): δ 7.31 (s, 1H), 3.90 (s, 3H), 3.89 (s, 3H), 3.86 (s, 3H); <sup>13</sup>C NMR (100 MHz, CDCl<sub>3</sub>): δ 155.8 (C), 154.2 (C), 143.5 (C), 122.1 (q, J<sub>C-F</sub> = 275.0 Hz, CF<sub>3</sub>), 121.5 (CH), 120.3 (q, J<sub>C-F</sub> = 29.8 Hz, C), 82.7 (q, J<sub>C-F</sub> = 2.5 Hz, C), 62.1 (CH<sub>3</sub>), 60.8 (CH<sub>3</sub>), 56.3 (CH<sub>3</sub>); <sup>19</sup>F NMR (376 MHz, CDCl<sub>3</sub>): δ -55.7 (s, CF<sub>3</sub>); HRMS (ES<sup>+</sup>) cald. for (M+H)<sup>+</sup> C<sub>10</sub>H<sub>11</sub>O<sub>3</sub>F<sub>3</sub>I: 362.9699, found: 362.9698.

#### 2-(Trifluoromethyl)-3,4,5-trimethoxybenzaldehyde (2j)

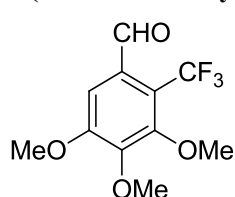

Prepared following general procedure A using 3,4,5-trimethoxybenzaldehyde (58.9 mg, 0.3 mmol). The reaction mixture was purified by flash chromatography using 40% DCM in pentane to afford **2j** as a yellow oil (Yield = 63%). <sup>1</sup>H NMR (400 MHz, CDCl<sub>3</sub>): δ 10.32 (q, J<sub>H-F</sub> = 2.4 Hz, 1H), 7.34 (s, 1H), 3.95 (s, 6H), 3.93 (s, 3H); <sup>13</sup>C NMR (100 MHz, CDCl<sub>3</sub>): δ 189.2 (q, J<sub>C-F</sub> = 6.0 Hz, CO), 155.8 (C), 152.8 (q, J<sub>C-F</sub> = 2.5 Hz, C), 147.3 (C), 130.8 (C), 124.1 (q, J<sub>C-F</sub> = 275.1 Hz, CF<sub>3</sub>), 117.9 (q, J<sub>C-F</sub> = 31.2 Hz, C), 107.2 (CH), 62.0 (CH<sub>3</sub>), 61.0 (CH<sub>3</sub>), 56.2 (CH<sub>3</sub>); <sup>19</sup>F NMR (376 MHz, CDCl<sub>3</sub>): δ -51.1 (s, CF<sub>3</sub>); HRMS (ES<sup>+</sup>) cald. for (M+H)<sup>+</sup> C<sub>11</sub>H<sub>12</sub>O<sub>4</sub>F<sub>3</sub>: 265.0682, found: 265.0682.

#### 2'-(Trifluoromethyl)-3',4',5'-trimethoxyacetophenone (2k)

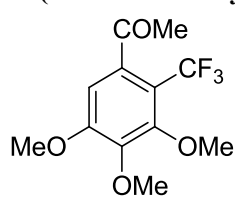

Prepared following general procedure A using 3',4',5'-trimethoxyacetophenone (63.1 mg, 0.3 mmol). The reaction mixture was purified by flash chromatography using 100% DCM to afford **2k** as a yellow oil (Yield = 61%). <sup>1</sup>H NMR (400 MHz, CDCl<sub>3</sub>): δ 6.47 (s, 1H), 3.93 (s, 3H), 3.88 (s, 3H), 3.87 (s, 3H), 2.45 (q, J<sub>H-F</sub> = 1.2 Hz, 3H); <sup>13</sup>C NMR (100 MHz, CDCl<sub>3</sub>): δ 202.4 (CO), 156.2 (C), 152.7 (q, J<sub>C-F</sub> = 1.9 Hz, C), 143.4 (C), 137.6 (q, J<sub>C-F</sub> = 2.6 Hz, C), 123.4 (q, J<sub>C-F</sub> = 273.1 Hz, CF<sub>3</sub>), 112.8 (q, J<sub>C-F</sub> = 31.0 Hz, C), 104.4 (CH), 61.7 (CH<sub>3</sub>), 60.8 (CH<sub>3</sub>), 56.2 (CH<sub>3</sub>), 31.3 (q, J<sub>C-F</sub> = 3.1 Hz, CH<sub>3</sub>); <sup>19</sup>F NMR (376 MHz, CDCl<sub>3</sub>): δ -55.0 (s, CF<sub>3</sub>); HRMS (ES<sup>+</sup>) cald. for (M+H)<sup>+</sup> C<sub>12</sub>H<sub>14</sub>O<sub>4</sub>F<sub>3</sub>: 279.0839, found: 279.0839.

### Methyl 2-(trifluoromethyl)-3,4,5-trimethoxybenzoate (**2l**)

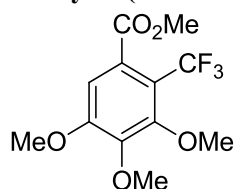

Prepared following general procedure A using methyl 3,4,5-trimethoxybenzoate (67.9 mg, 0.3 mmol). The reaction mixture was purified by flash chromatography using 100% DCM to afford **2l** as a yellow oil (Yield = 54%).  $^1\text{H}$  NMR (400 MHz,  $\text{CDCl}_3$ ):  $\delta$  6.74 (s, 1H), 3.93 (s, 3H), 3.89 (s, 3H), 3.87 (s, 3H), 3.86 (s, 3H);  $^{13}\text{C}$  NMR (100 MHz,  $\text{CDCl}_3$ ):  $\delta$  168.4 (CO), 155.9 (C), 152.9 (q,  $J_{\text{C-F}} = 1.7$  Hz, C), 144.1 (C), 128.4 (q,  $J_{\text{C-F}} = 2.9$  Hz, C), 123.0 (q,  $J_{\text{C-F}} = 273.0$  Hz,  $\text{CF}_3$ ), 114.5 (q,  $J_{\text{C-F}} = 30.9$  Hz, C), 106.8 (CH), 61.8 ( $\text{CH}_3$ ), 60.8 ( $\text{CH}_3$ ), 56.2 ( $\text{CH}_3$ ), 52.9 ( $\text{CH}_3$ );  $^{19}\text{F}$  NMR (376 MHz,  $\text{CDCl}_3$ ):  $\delta$  -56.9 (s,  $\text{CF}_3$ ); HRMS ( $\text{ES}^+$ ) cald. for (M)  $\text{C}_{12}\text{H}_{13}\text{O}_5\text{F}_3$ : 294.0710, found: 294.0709.

### *N,N*-Dimethyl-2-(trifluoromethyl)aniline (**2m**) and *N,N*-Dimethyl-4-(trifluoromethyl)aniline (**2m**<sup>\*</sup>)<sup>2</sup>

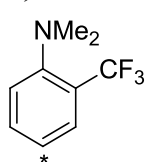

Prepared following general procedure A using *N,N*-dimethylaniline (53.2 mg (58.4  $\mu\text{L}$ ), 0.3 mmol). The reaction mixture was purified by flash chromatography using 100% pentane to afford a mixture of **2m** and **2m**<sup>\*</sup> as a colourless oil (Yield = 75%, **2l**:**2l**<sup>\*</sup> = 2:1). ***N,N*-Dimethyl-2-(trifluoromethyl)aniline (**2m**)**:  $^1\text{H}$  NMR (400 MHz,  $\text{CDCl}_3$ ):  $\delta$  7.62 (dd,  $J = 7.9, 1.5$  Hz, 1H), 7.51 (t,  $J = 7.7$  Hz, 1H), 7.36 (d,  $J = 8.1$  Hz, 1H), 7.17 (t,  $J = 7.6$  Hz, 1H), 2.76 (s, 6H);  $^{13}\text{C}$  NMR (100 MHz,  $\text{CDCl}_3$ ):  $\delta$  153.8 (C), 132.6 (CH), 127.3 (q,  $J_{\text{C-F}} = 5.5$  Hz, CH), 125.6 (q,  $J_{\text{C-F}} = 28.9$  Hz, C), 123.6 (CH), 124.2 (q,  $J_{\text{C-F}} = 273.0$  Hz,  $\text{CF}_3$ ), 122.7 (CH), 45.8 ( $\text{CH}_3$ );  $^{19}\text{F}$  NMR (376 MHz,  $\text{CDCl}_3$ ):  $\delta$  -60.1 (s,  $\text{CF}_3$ ); ***N,N*-Dimethyl-4-(trifluoromethyl)aniline (**2m**<sup>\*</sup>)**:  $^1\text{H}$  NMR (400 MHz,  $\text{CDCl}_3$ ):  $\delta$  7.47 (d,  $J = 8.6$  Hz, 2H), 6.71 (d,  $J = 8.8$  Hz, 2H), 3.02 (s, 6H);  $^{13}\text{C}$  NMR (100 MHz,  $\text{CDCl}_3$ ):  $\delta$  152.3 (C), 126.3 (q,  $J_{\text{C-F}} = 3.8$  Hz, CH), 125.2 (q,  $J_{\text{C-F}} = 270.2$  Hz,  $\text{CF}_3$ ), 117.4 (q,  $J_{\text{C-F}} = 32.8$  Hz, C), 111.1 (CH), 40.0 ( $\text{CH}_3$ );  $^{19}\text{F}$  NMR (376 MHz,  $\text{CDCl}_3$ ):  $\delta$  -60.8 (s,  $\text{CF}_3$ ).

### 4-Bromo-*N,N*-dimethyl-2-(trifluoromethyl)aniline (**2n**)

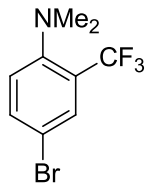

Prepared following general procedure A using 4-bromo-*N,N*-dimethylaniline (60.0 mg, 0.3 mmol). The reaction mixture was purified by flash chromatography using 100% pentane to afford **2n** (as a mixture with a small amount of an inseparable impurity) as a yellow oil (Yield = 64%).  $^1\text{H}$  NMR (400 MHz,  $\text{CDCl}_3$ ):  $\delta$  7.72 (d,  $J = 2.4$  Hz, 1H), 7.58 (dd,  $J = 8.8, 2.4$  Hz, 1H), 7.19 (d,  $J = 8.8$  Hz, 1H), 2.72 (s, 6H);  $^{13}\text{C}$  NMR (100 MHz,  $\text{CDCl}_3$ ):  $\delta$  152.7 (C), 135.5 (CH), 130.5 (q,  $J_{\text{C-F}} = 5.8$  Hz, CH), 127.1 (q,  $J_{\text{C-F}} = 29.7$  Hz, C), 124.4 (CH), 123.2 (q,  $J_{\text{C-F}} = 273.6$  Hz,  $\text{CF}_3$ ), 116.0 (C), 45.5 ( $\text{CH}_3$ );  $^{19}\text{F}$  NMR (376 MHz,  $\text{CDCl}_3$ ):  $\delta$  -60.3 (s,  $\text{CF}_3$ ); HRMS ( $\text{ES}^+$ ) cald. for (M+H)<sup>+</sup>  $\text{C}_9\text{H}_{10}\text{N}_1\text{Br}_1\text{F}_3$ : 267.9943, found: 267.9942.

### 2-(Trifluoromethyl)acetanilide (**2o**<sup>o</sup>), 3-(trifluoromethyl)acetanilide (**2o**<sup>m</sup>)<sup>3</sup> and 4-(trifluoromethyl)acetanilide (**2o**<sup>p</sup>)<sup>4</sup>

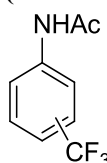

Prepared following general procedure A using acetanilide (40.6 mg, 0.3 mmol). The reaction mixture was purified by flash chromatography using 10%  $\text{Et}_2\text{O}$  in pentane to afford **2o**<sup>o</sup> and an inseparable mixture of **2o**<sup>m</sup> and **2o**<sup>p</sup>, each as off-white solids (Yield = 48%, **o**:**m**:**p** = 3:1:4.3). **2-(Trifluoromethyl)acetanilide**: Mp = 72 – 74 °C;  $^1\text{H}$  NMR (400 MHz,  $\text{CDCl}_3$ ):  $\delta$  8.15 (d,  $J = 7.9$  Hz, 1H), 7.60 (d,  $J = 7.8$  Hz, 1H), 7.55 (t,  $J = 7.8$  Hz, 1H), 7.42 (bs, NH), 7.23 (t,  $J = 7.5$  Hz, 1H), 2.22 (s, 3H);  $^{13}\text{C}$  NMR (100 MHz,  $\text{CDCl}_3$ ):  $\delta$  168.4 (CO), 135.2 (C), 132.8 (CH), 126.0 (q,  $J_{\text{C-F}} = 3.5$  Hz, CH), 124.7 (CH), 124.5 (CH), 24.6 ( $\text{CH}_3$ );  $^{19}\text{F}$  NMR (376 MHz,  $\text{CDCl}_3$ ):  $\delta$  -60.6 (s,  $\text{CF}_3$ ); HRMS ( $\text{ES}^+$ ) cald. for (M+H)<sup>+</sup>  $\text{C}_9\text{H}_9\text{O}_1\text{N}_1\text{F}_3$ : 204.0631, found: 204.0632. **3-(Trifluoromethyl)acetanilide**:  $^1\text{H}$  NMR (400 MHz,  $\text{CDCl}_3$ ):  $\delta$  7.79 (s, 1H), 7.71 (d,  $J = 8.7$  Hz, 1H), 7.63 (bs, NH), 7.42 (t,  $J = 7.9$ , 1H), 7.35 (t,  $J = 7.7$  Hz, 1H), 2.20 (s, 3H);  $^{19}\text{F}$  NMR (376 MHz,  $\text{CDCl}_3$ ):  $\delta$  -62.8 (s,  $\text{CF}_3$ ). **4-(Trifluoromethyl)acetanilide**:  $^1\text{H}$  NMR (400 MHz,  $\text{CDCl}_3$ ):  $\delta$  7.63 (d,  $J = 8.5$  Hz, 2H), 7.63 (bs, NH), 7.55 (d,  $J = 8.6$  Hz, 2H), 2.20 (s, 3H);  $^{13}\text{C}$  NMR (100 MHz,  $\text{CDCl}_3$ ):  $\delta$  168.7 (CO), 140.9 (C), 126.2 (q,  $J_{\text{C-F}} = 3.7$  Hz, CH), 125.9 (C), 124.1 (q,  $J_{\text{C-F}} = 271.4$  Hz,  $\text{CF}_3$ ), 119.3 (CH), 24.7 ( $\text{CH}_3$ );  $^{19}\text{F}$  NMR (376 MHz,  $\text{CDCl}_3$ ):  $\delta$  -62.1 (s,  $\text{CF}_3$ ).

### 1,1,1-Trifluorotoluene (**2p**)

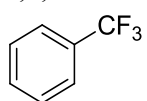

Prepared following general procedure B using benzene (390.6 mg (447  $\mu\text{L}$ ), 5.0 mmol). The reaction mixture was analysed directly by  $^{19}\text{F}$  NMR (Yield = 60%).  $^{19}\text{F}$  NMR (376 MHz,  $\text{CDCl}_3$ ):  $\delta$  -62.8 (s,  $\text{CF}_3$ ).

### 1,4-Dimethyl-2-(trifluoromethyl)benzene (2q)

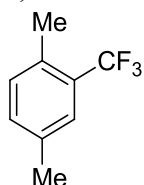

Prepared following general procedure B using p-xylene (530.9 mg (617  $\mu$ L), 5.0 mmol). The reaction mixture was analysed directly by  $^{19}\text{F}$  NMR (Yield = 67%).  $^{19}\text{F}$  NMR (376 MHz,  $\text{CDCl}_3$ ):  $\delta$  -61.8 (s,  $\text{CF}_3$ ).

### 1,3,5-Trimethyl-2-(trifluoromethyl)benzene (2r)

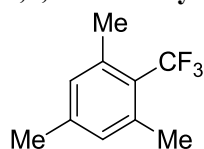

Prepared following general procedure B using mesitylene (300.5 mg (348  $\mu$ L), 2.5 mmol). The reaction mixture was analysed directly by  $^{19}\text{F}$  NMR (Yield = 71%).  $^{19}\text{F}$  NMR (376 MHz,  $\text{CDCl}_3$ ):  $\delta$  -53.8 (s,  $\text{CF}_3$ ).

### N-Methyl-2-(trifluoromethyl)pyrrole (2s)<sup>5</sup>

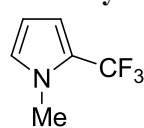

Prepared following general procedure A using N-methylpyrrole (24.3 mg (26.6  $\mu$ L), 0.3 mmol). The reaction mixture was analysed directly by  $^1\text{H}$  and  $^{19}\text{F}$  NMR (Yield = 94%).  $^1\text{H}$  NMR (400 MHz,  $\text{CDCl}_3$ ):  $\delta$  6.70 (t,  $J$  = 2.1 Hz, 1H), 6.56 – 6.54 (m, 1H), 6.10 (t,  $J$  = 3.2 Hz, 1H), 3.72 (s, 3H);  $^{19}\text{F}$  NMR (376 MHz,  $\text{CDCl}_3$ ):  $\delta$  -58.8 (s,  $\text{CF}_3$ ).

### 2-Acetyl-N-methyl-5-(trifluoromethyl)pyrrole (2t)<sup>6</sup>

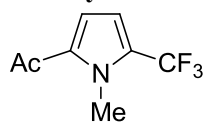

Prepared following general procedure A using N-methyl-2-acetylpyrrole (36.9 mg (35.5  $\mu$ L), 0.3 mmol). The reaction mixture was analysed directly by  $^1\text{H}$  and  $^{19}\text{F}$  NMR (Yield = 93%).  $^1\text{H}$  NMR (400 MHz,  $\text{CDCl}_3$ ):  $\delta$  6.88 (d,  $J$  = 4.3 Hz, 1H), 6.54 (d,  $J$  = 4.3 Hz, 1H), 4.00 (s, 3H), 2.47 (s, 3H);  $^{19}\text{F}$  NMR (376 MHz,  $\text{CDCl}_3$ ):  $\delta$  -59.8 (s,  $\text{CF}_3$ ).

### N-Boc-2-(trifluoromethyl)pyrrole (2u)<sup>5</sup>

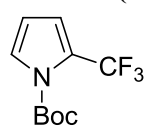

Prepared following general procedure A using N-Boc-pyrrole (50.2 mg (50.2  $\mu$ L), 0.3 mmol). The reaction mixture was analysed directly by  $^1\text{H}$  and  $^{19}\text{F}$  NMR (Yield = 50%).  $^1\text{H}$  NMR (400 MHz,  $\text{CDCl}_3$ ):  $\delta$  7.44 (dd,  $J$  = 3.3, 1.9 Hz, 1H), 6.74 – 6.72 (m, 1H), 6.19 (t,  $J$  = 3.4 Hz, 1H), 1.61 (s, 9H);  $^{19}\text{F}$  NMR (376 MHz,  $\text{CDCl}_3$ ):  $\delta$  -58.3 (s,  $\text{CF}_3$ ).

### 2-Methyl-5-(trifluoromethyl)furan (2v)<sup>5</sup>

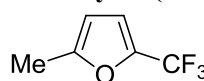

Prepared following general procedure A using 2-methylfuran (24.6 mg (27.1  $\mu$ L), 0.3 mmol). The reaction mixture was analysed directly by  $^1\text{H}$  and  $^{19}\text{F}$  NMR (Yield = 51%).  $^1\text{H}$  NMR (400 MHz,  $\text{CDCl}_3$ ):  $\delta$  6.64 (d,  $J$  = 1.8 Hz, 1H), 6.03 (d,  $J$  = 3.3 Hz, 1H), 2.32 (s, 3H);  $^{19}\text{F}$  NMR (376 MHz,  $\text{CDCl}_3$ ):  $\delta$  -63.9 (s,  $\text{CF}_3$ ).

### 2-Methyl-5-(trifluoromethyl)thiophene (2w)<sup>5</sup>

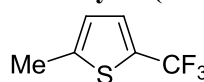

Prepared following general procedure A using 2-methylthiophene (29.5 mg (29.0  $\mu$ L), 0.3 mmol). The reaction mixture was analysed directly by  $^1\text{H}$  and  $^{19}\text{F}$  NMR (Yield = 42%).  $^1\text{H}$  NMR (400 MHz,  $\text{CDCl}_3$ ):  $\delta$  7.20 (dd,  $J$  = 3.6, 1.1 Hz, 1H), 6.68 (m, 1H), 2.48 (s, 3H);  $^{19}\text{F}$  NMR (376 MHz,  $\text{CDCl}_3$ ):  $\delta$  -55.1 (s,  $\text{CF}_3$ ).

### 2-Methoxy-5-(trifluoromethyl)thiophene (2x)

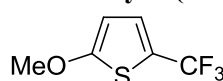

Prepared following general procedure A using 2-methoxythiophene (34.3 mg (30.2  $\mu$ L), 0.3 mmol). The reaction mixture was analysed directly by  $^1\text{H}$  and  $^{19}\text{F}$  NMR and the identity of the product was further confirmed by GC/MS (Yield = 76%).  $^1\text{H}$  NMR (400 MHz,  $\text{CDCl}_3$ ):  $\delta$  7.06 – 7.04 (m, 1H), 6.11 (dd,  $J$  = 4.1, 0.7 Hz, 1H), 3.87 (s, 3H);  $^{19}\text{F}$  NMR (376 MHz,  $\text{CDCl}_3$ ):  $\delta$  -55.3 (s,  $\text{CF}_3$ ); GC/MS:  $M(\text{C}_6\text{H}_5\text{OSF}_3) = 182.0$ , found = 182.0.

### 1,2-Dimethyl-3-(trifluoromethyl)indole (2v)<sup>7</sup>

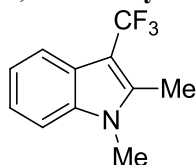

Prepared following general procedure A using 1,2-dimethylindole (43.6 mg, 0.3 mmol). The reaction mixture was purified by flash chromatography using 10% DCM in pentane to afford **2v** as a yellow solid (Yield = 46%).  $^1\text{H}$  NMR (400 MHz,  $\text{CDCl}_3$ ):  $\delta$  7.71 (d,  $J$  = 8.0 Hz, 1H), 7.27 – 7.16 (m, 3H), 3.62 (s, 3H), 2.50 (q,  $J_{\text{H-F}} = 1.3$  Hz, 3H);  $^{13}\text{C}$  NMR (100

MHz, CDCl<sub>3</sub>): δ 137.3 (C), 136.1 (C), 125.5 (q, J<sub>C-F</sub> = 266.7 Hz, CF<sub>3</sub>), 124.4 (q, J<sub>C-F</sub> = 1.6 Hz, C), 121.9 (CH), 121.0 (CH), 119.0 (CH), 109.2 (CH), 102.5 (q, J<sub>C-F</sub> = 35.1 Hz, C), 29.4 (CH<sub>3</sub>), 10.9 (CH<sub>3</sub>); <sup>19</sup>F NMR (376 MHz, CDCl<sub>3</sub>): δ -53.6 (s, CF<sub>3</sub>).

### 7-Methoxy-4-(trifluoromethyl)-1,2-benzisothiazole (**2z**) and 7-methoxy-3-(trifluoromethyl)-1,2-benzisothiazole (**2z**<sup>\*</sup>)

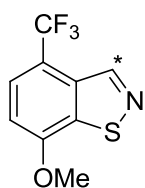

Prepared following general procedure A using 7-methoxy-1,2-benzisothiazole (49.5 mg, 0.3 mmol). The reaction mixture was purified by flash chromatography using 20% DCM in iso-hexane to afford a mixture of **2w** and **2w**<sup>\*</sup> as a white solid (Yield = 41%, **2w**:**2w**<sup>\*</sup> = 5:1). **7-Methoxy-4-(trifluoromethyl)-1,2-benzisothiazole (2w)**: <sup>1</sup>H NMR (400 MHz, CDCl<sub>3</sub>): δ 9.04 (q, J<sub>H-F</sub> = 1.6 Hz, 1H), 7.68 (d, J = 8.0 Hz, 1H), 6.86 (d, J = 8.0 Hz, 1H), 4.06 (s, 3H); <sup>13</sup>C NMR (100 MHz, CDCl<sub>3</sub>): δ 155.4 (C), 152.9 (q, J<sub>C-F</sub> = 2.1 Hz, CH), 144.0 (C), 133.6 (q, J<sub>C-F</sub> = 1.3 Hz, C), 125.5 (q, J<sub>C-F</sub> = 5.1 Hz, CH), 124.1 (q, J<sub>C-F</sub> = 271.5 Hz, CF<sub>3</sub>), 118.0 (q, J<sub>C-F</sub> = 34.1 Hz, C), 105.0 (CH), 56.2 (CH<sub>3</sub>); <sup>19</sup>F NMR (376 MHz, CDCl<sub>3</sub>): δ -59.9 (s, CF<sub>3</sub>); **7-Methoxy-3-(trifluoromethyl)-1,2-benzisothiazole (2w**<sup>\*</sup>): <sup>1</sup>H NMR (400 MHz, CDCl<sub>3</sub>): δ 7.73 (d, J = 8.2 Hz, 1H), 7.47 (t, J = 8.0 Hz, 1H), 6.93 (d, J = 7.7 Hz, 1H), 4.02 (s, 3H); <sup>19</sup>F NMR (376 MHz, CDCl<sub>3</sub>): δ -63.6 (s, CF<sub>3</sub>); HRMS (ES<sup>+</sup>) cald. for (M+H)<sup>+</sup> C<sub>9</sub>H<sub>7</sub>O<sub>1</sub>N<sub>1</sub>F<sub>3</sub>S<sub>1</sub>: 234.0195, found: 234.0194.

### 2,6-dimethoxy-3-(trifluoromethyl)pyridine (**2aa**)

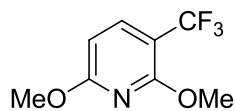

Prepared following general procedure A using 2,6-dimethoxypyridine (41.7 mg (39.6 μL), 0.3 mmol). The reaction mixture was purified by flash chromatography using 100% pentane to afford **2x** as a white solid (Yield = 72%). <sup>1</sup>H NMR (400 MHz, CDCl<sub>3</sub>): δ 7.71 (d, J = 8.3 Hz, 1H), 6.32 (d, J = 8.3 Hz, 1H), 4.02 (s, 3H), 3.96 (s, 3H); <sup>13</sup>C NMR (100 MHz, CDCl<sub>3</sub>): δ 165.1 (C), 160.4 (C), 138.8 (q, J<sub>C-F</sub> = 4.5 Hz, CH), 123.7 (q, J<sub>C-F</sub> = 270.1 Hz, CF<sub>3</sub>), 104.3 (q, J<sub>C-F</sub> = 33.5 Hz, C), 100.8 (CH), 53.9 (CH<sub>3</sub>), 53.8 (CH<sub>3</sub>); <sup>19</sup>F NMR (376 MHz, CDCl<sub>3</sub>): δ -61.9 (s, CF<sub>3</sub>); HRMS (ES<sup>+</sup>) cald. for (M+H)<sup>+</sup> C<sub>8</sub>H<sub>9</sub>O<sub>2</sub>N<sub>1</sub>F<sub>3</sub>: 208.0580, found: 208.0582.

### Pyrifitalid-CF<sub>3</sub> (**3**)

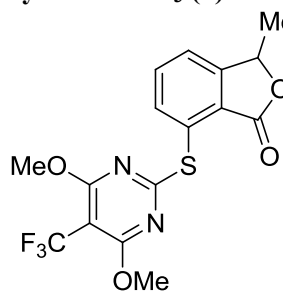

Prepared following general procedure A using (±)-pyrifitalid (95.5 mg, 0.3 mmol). The reaction mixture was purified by flash chromatography using 70% DCM in iso-hexane to afford **3** as a white solid (Yield = 42%). Mp = 154 – 156 °C; <sup>1</sup>H NMR (400 MHz, CDCl<sub>3</sub>): δ 7.78 (d, J = 7.6 Hz, 1H), 7.70 (t, J = 7.6 Hz, 1H), 7.50 (d, J = 7.7 Hz, 1H), 5.53 (q, J = 6.7 Hz, 1H), 3.76 (s, 6H), 1.64 (d, J = 6.7 Hz, 3H); <sup>13</sup>C NMR (100 MHz, CDCl<sub>3</sub>): δ 171.7 (C), 167.9 (C), 167.3 (C), 152.7 (C), 136.3 (CH), 133.9 (CH), 129.5 (C), 127.2 (C), 123.1 (q, J<sub>C-F</sub> = 272.4 Hz, CF<sub>3</sub>), 122.6 (CH), 91.6 (q, J<sub>C-F</sub> = 34.3 Hz, C), 76.2 (CH), 54.8 (CH<sub>3</sub>), 20.5 (CH<sub>3</sub>); <sup>19</sup>F NMR (376 MHz, CDCl<sub>3</sub>): δ -56.3 (s, CF<sub>3</sub>). HRMS (ES<sup>+</sup>) cald. for (M+H)<sup>+</sup> C<sub>16</sub>H<sub>14</sub>O<sub>4</sub>N<sub>2</sub>F<sub>3</sub>S<sub>1</sub>: 387.0621, found: 387.0620.

### Napropamide-CF<sub>3</sub> (**4**)

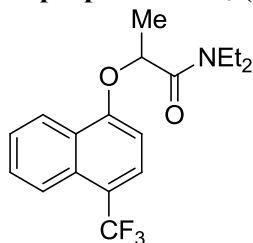

Prepared following general procedure A using (±)-napropamide (81.4 mg, 0.3 mmol). The reaction mixture was purified by flash chromatography using 20% EtOAc in iso-hexane to afford **4** as a white solid (Yield = 51%). Mp = 77 – 81 °C; <sup>1</sup>H NMR (400 MHz, CDCl<sub>3</sub>): δ 8.41 (d, J = 9.0 Hz, 1H), 8.12 (d, J = 8.7 Hz, 1H), 7.74 (d, J = 8.2 Hz, 1H), 7.63 (ddd, J = 8.5, 6.8, 1.5 Hz, 1H), 7.56 (ddd, J = 8.2, 6.9, 1.2 Hz, 1H), 6.77 (d, J = 8.2 Hz, 1H), 5.17 (q, J = 6.7 Hz, 1H), 3.59 – 3.34 (m, 4H), 1.76 (d, J = 6.7 Hz, 3H), 1.12 (t, J = 7.1 Hz, 3H), 1.05 (t, J = 7.1 Hz, 3H); <sup>13</sup>C NMR (100 MHz, CDCl<sub>3</sub>): δ 169.4 (CO), 156.2 (C), 130.2 (C), 128.1 (CH), 126.0 (CH), 125.9 (C), 125.5 (q, J<sub>C-F</sub> = 6.1 Hz, CH), 124.9 (q, J<sub>C-F</sub> = 272.3 Hz, CF<sub>3</sub>), 124.0 (q, J<sub>C-F</sub> = 2.4 Hz, CH), 122.7 (CH), 118.9 (q, J<sub>C-F</sub> = 30.3 Hz, C), 103.3 (CH), 74.3 (CH), 41.1 (CH<sub>2</sub>), 40.4 (CH<sub>2</sub>), 17.9 (CH<sub>3</sub>), 14.1 (CH<sub>3</sub>), 12.6 (CH<sub>3</sub>); <sup>19</sup>F NMR (376 MHz, CDCl<sub>3</sub>): δ -59.1 (s, CF<sub>3</sub>). HRMS (ES<sup>+</sup>) cald. for (M+H)<sup>+</sup> C<sub>18</sub>H<sub>21</sub>O<sub>2</sub>N<sub>1</sub>F<sub>3</sub>: 340.1519, found: 340.1518.

### Trifluoromethylation in the presence of radical scavengers:

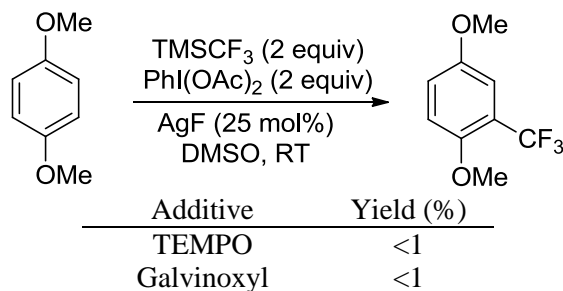

### Scheme S3. Reaction with radical scavengers

To an oven-dried reaction vial (5 mL) charged with 1,4-dimethoxybenzene (41.4 mg, 0.3 mmol), (diacetoxyiodo)benzene (193.3 mg, 0.6 mmol), a radical scavenger (0.6 mmol) and trimethyl(trifluoromethyl)silane (88.7  $\mu$ L, 0.6 mmol) in anhydrous DMSO (1 mL) was slowly added AgF (9.5 mg, 0.075 mmol). The vial was sealed with a septum cap and the reaction was stirred at room temperature for 20 h. The resulting mixture was quenched with water (5 mL) and extracted with Et<sub>2</sub>O (3  $\times$  5 mL). The combined organic layers were dried over MgSO<sub>4</sub>, filtered and concentrated under reduced pressure. The crude material was analysed by <sup>19</sup>F NMR spectroscopy (4-fluoroanisole as the internal standard) in CDCl<sub>3</sub>. With TEMPO, a characteristic TEMPO-CF<sub>3</sub> peak<sup>8</sup> was obtained at <sup>19</sup>F NMR:  $\delta$  -55.6 (89% NMR yield). No trifluoromethylation product was formed with either TEMPO or galvinoxyl.

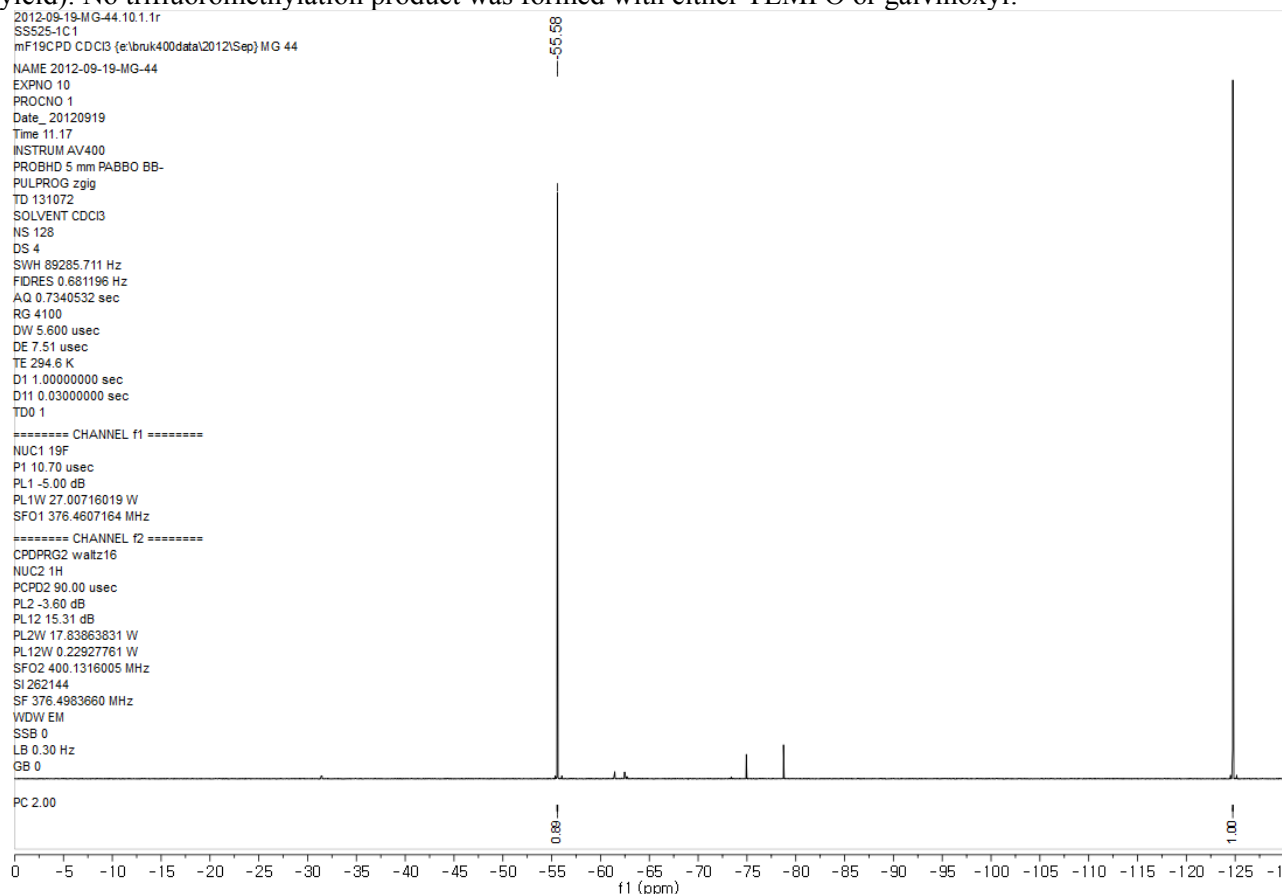



## II. References

- 1 Y. Ye, S. H. Lee and M. S. Sanford, *Org. Lett.*, 2011, **13**, 5464.
- 2 T. Knauber, F. Arian, G. -V. Roschenthaler and L. J. Goossen, *Chem. Eur. J.*, 2011, **17**, 2689.
- 3 T. Liu and Q. Shen, *Org. Lett.*, 2011, **13**, 2342.
- 4 H. Morimoto, T. Tsubogo, N. D. Litvinas and J. F. Hartwig, *Angew. Chem. Int. Ed.*, 2011, **50**, 3793.
- 5 D. A. Nagib and D. W. C. MacMillan, *Nature*, 2011, **480**, 224.
- 6 T. Kino, Y. Nagase, Y. Ohtsuka, K. Yamamoto, D. Uruguchi, K. Tokuhisa and T. Yamakawa, *J. Fluor. Chem.*, 2010, **131**, 98.
- 7 X. Mu, S. Chen, X. Zhen and G. Liu, *Chem. Eur. J.*, 2011, **17**, 6039.
- 8 X. Wang, Y. Ye, S. Zhang, J. Feng, Y. Xu, Y. Zhang and J. Wang, *J. Am. Chem. Soc.*, 2011, **133**, 16410.

### III. NMR Spectra of Isolated Compounds

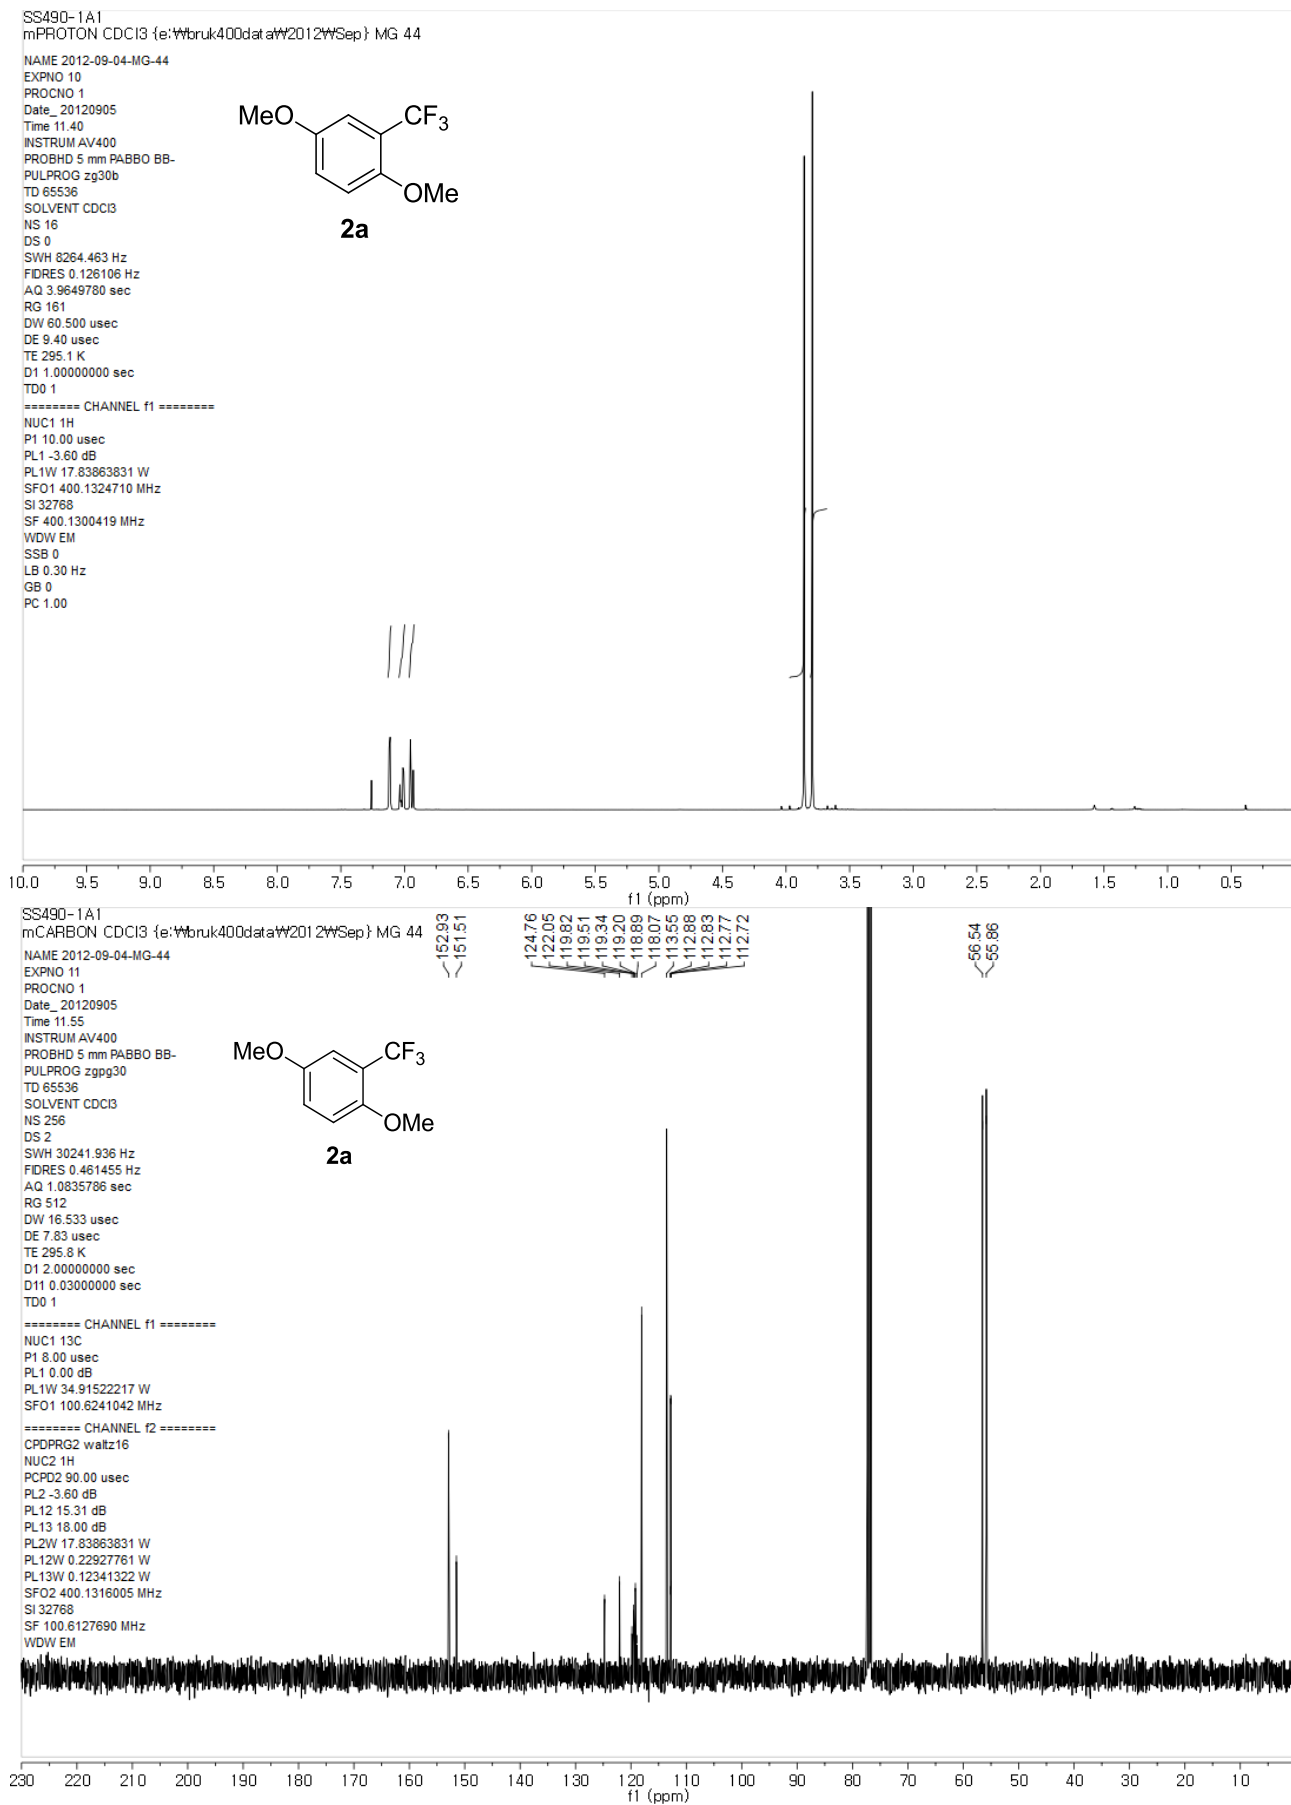

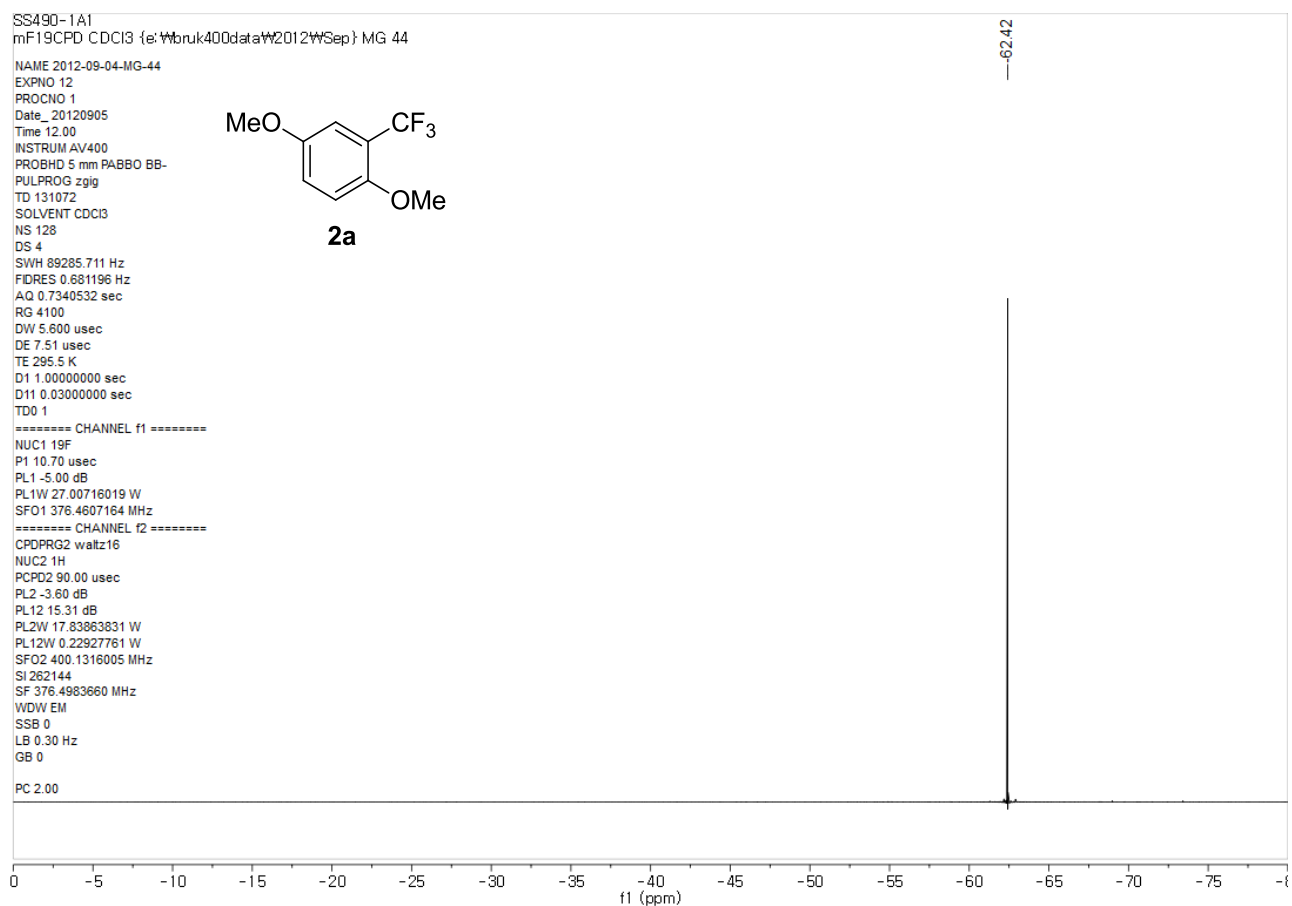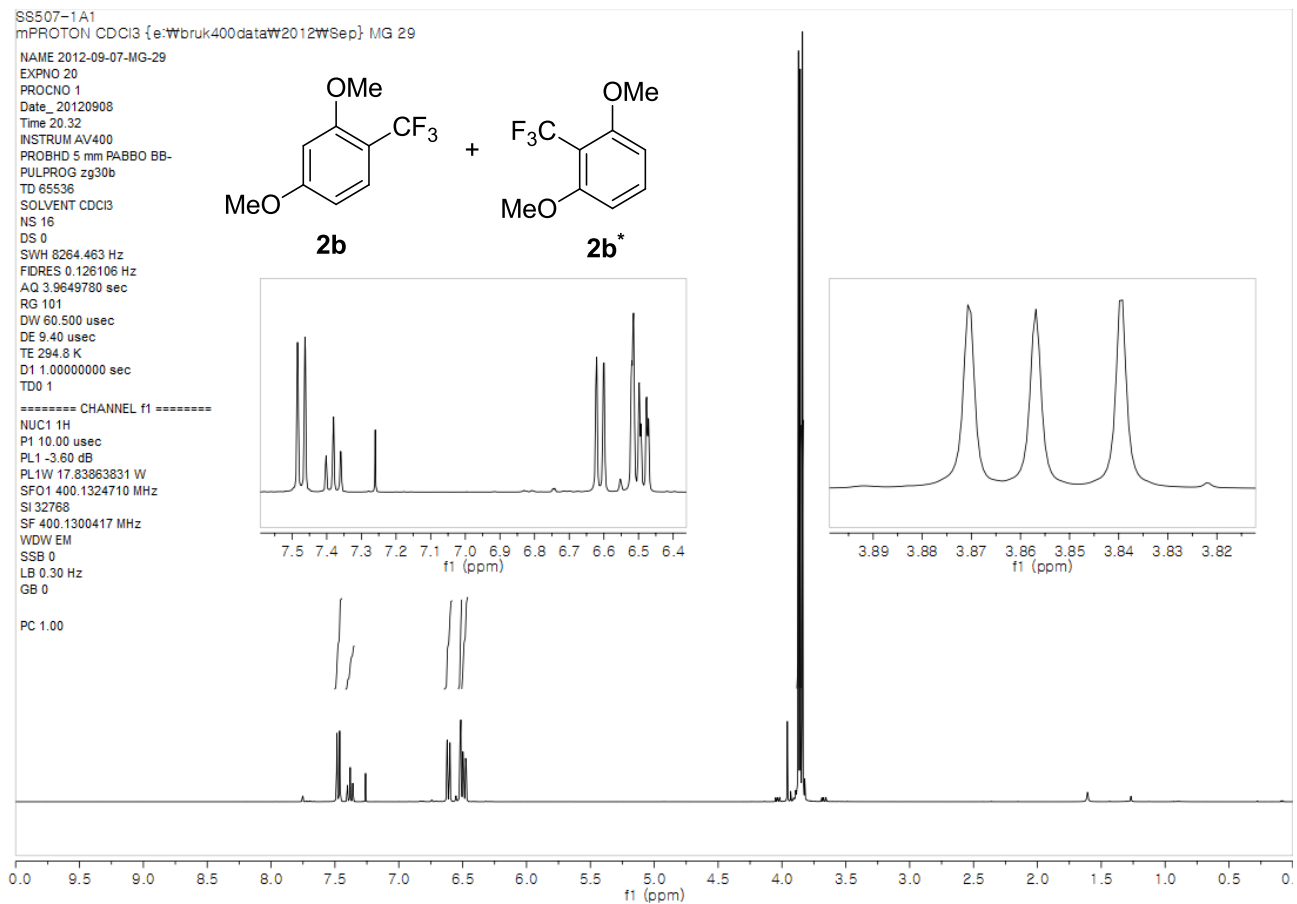

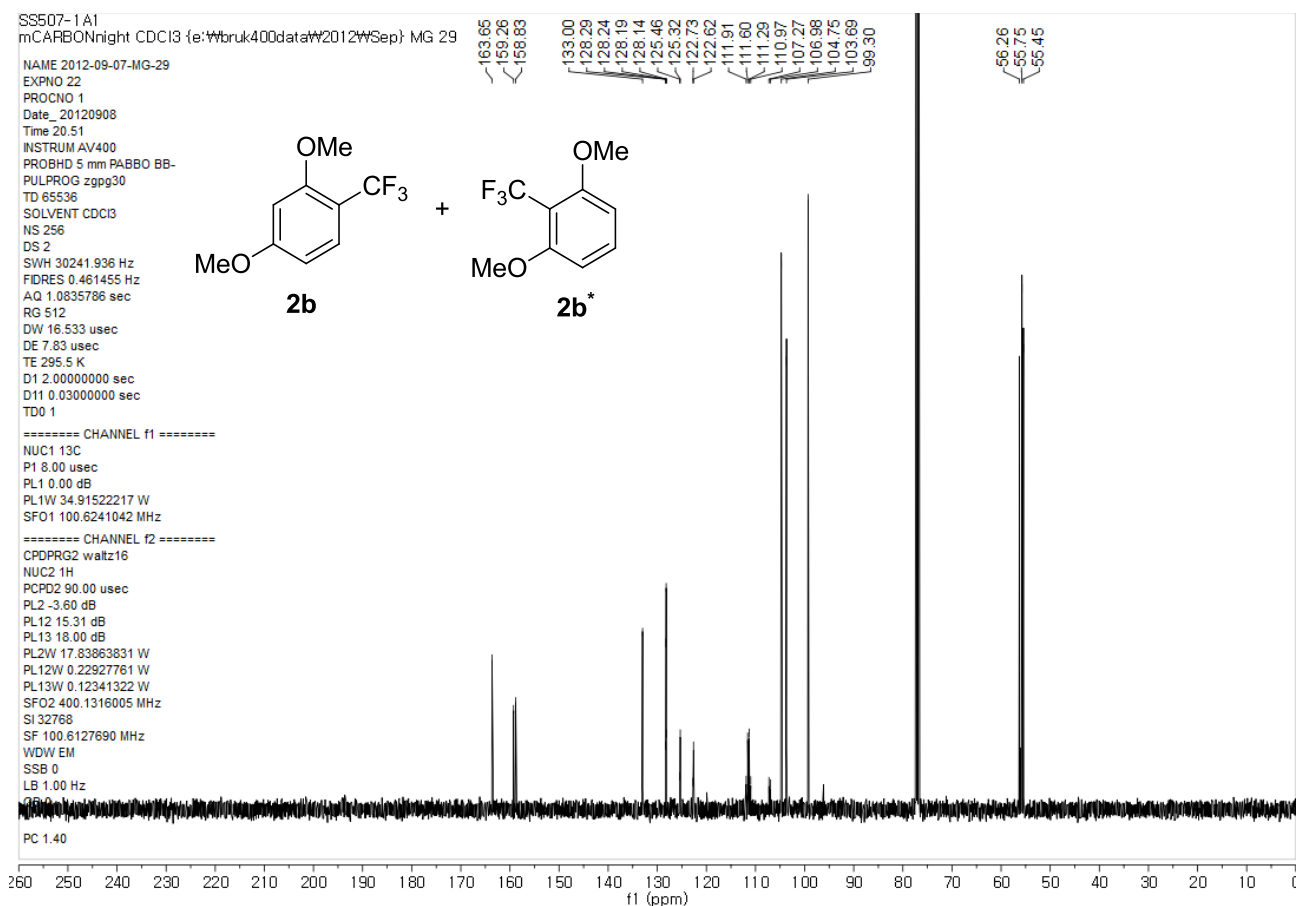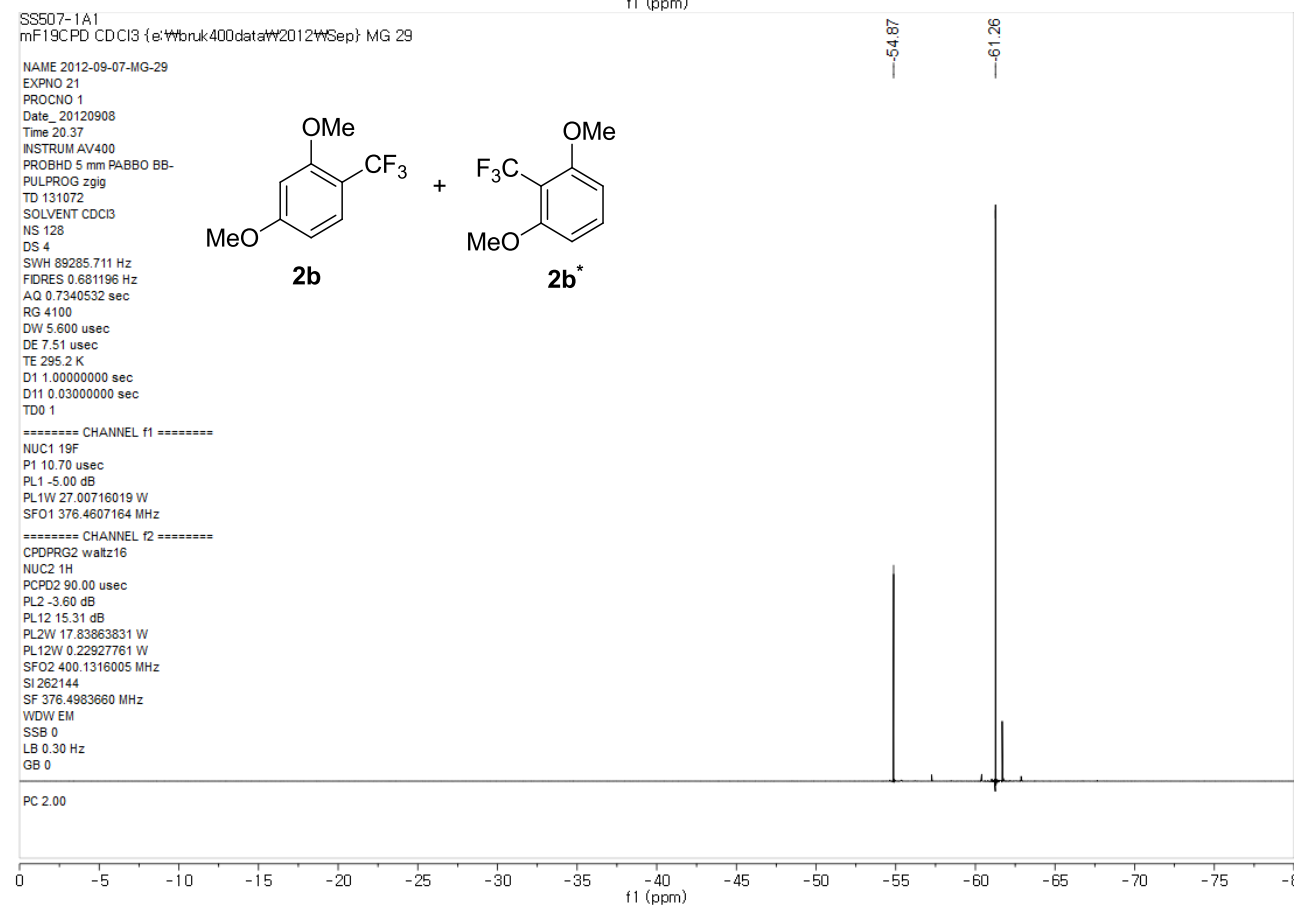

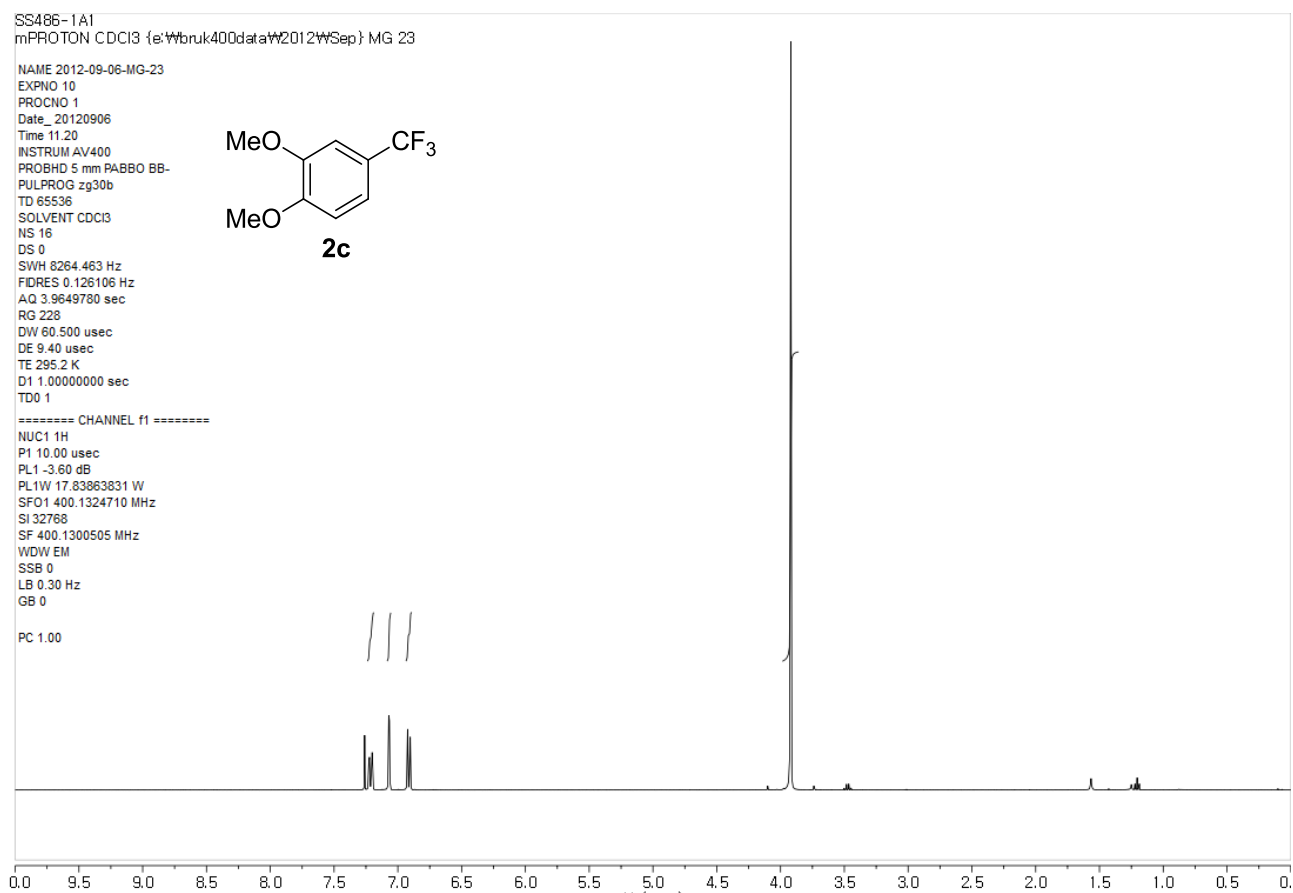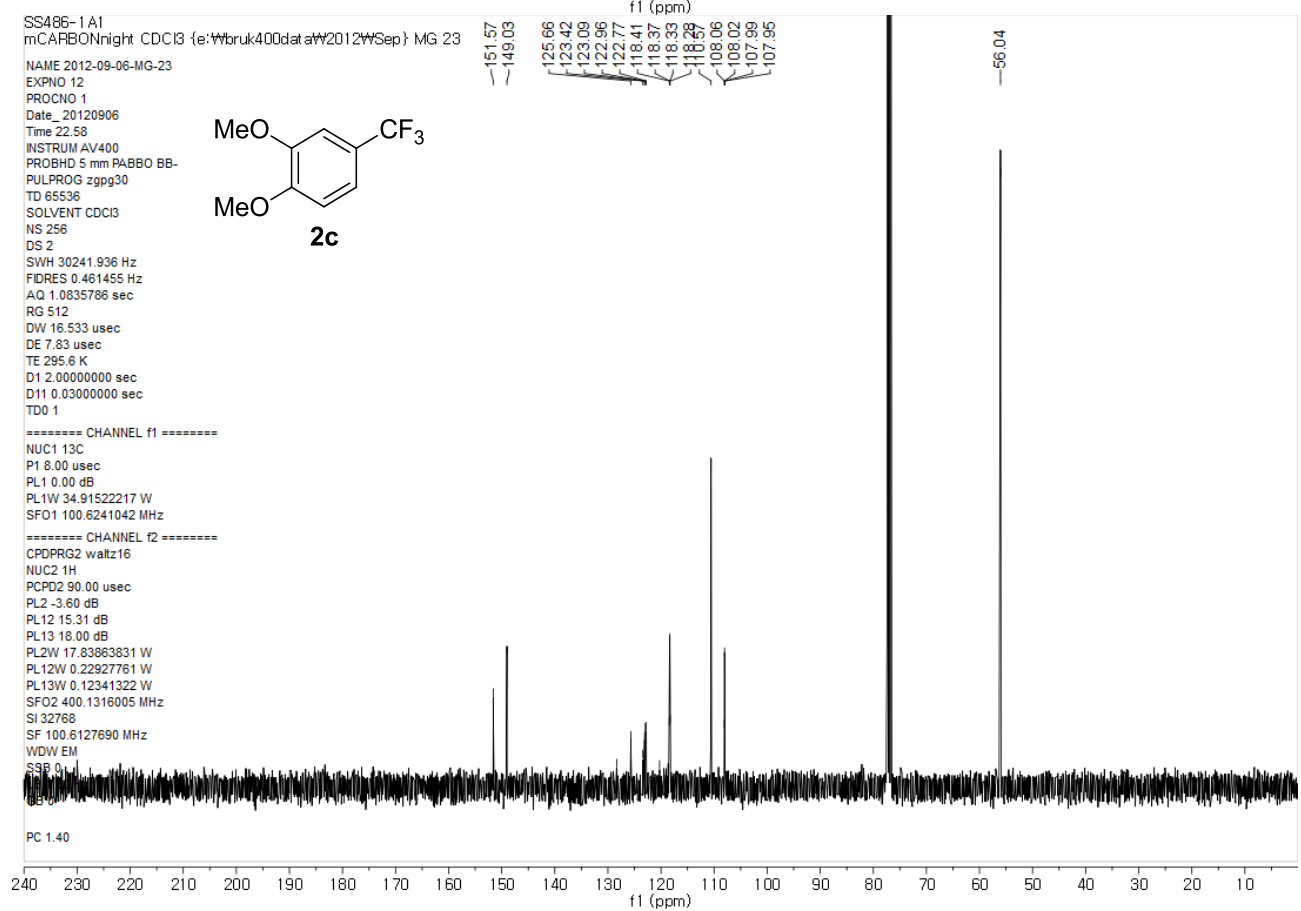

SS486-1A1  
mF19CPD CDCI3 {e:\bruk400\data\2012\WSep} MG 23

NAME 2012-09-06-MG-23  
EXPNO 11  
PROCNO 1  
Date\_ 20120906  
Time 11.25  
INSTRUM AV400  
PROBHD 5 mm PABBO BB-  
PULPROG zgig  
TD 131072  
SOLVENT CDCI3  
NS 128  
DS 4  
SWH 89285.711 Hz  
FIDRES 0.681196 Hz  
AQ 0.7340532 sec  
RG 4100  
DW 5.600 usec  
DE 7.51 usec  
TE 295.6 K  
D1 1.00000000 sec  
D11 0.03000000 sec  
TD0 1

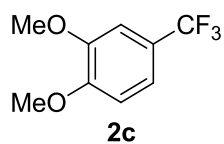

===== CHANNEL f1 =====  
NUC1 19F  
P1 10.70 usec  
PL1 -5.00 dB  
PL1W 27.00716019 W  
SFO1 376.4607164 MHz  
===== CHANNEL f2 =====  
CPDPRG2 waltz16  
NUC2 1H  
PCPD2 90.00 usec  
PL2 -3.60 dB  
PL12 15.31 dB  
PL2W 17.83863831 W  
PL12W 0.22927761 W  
SFO2 400.1316005 MHz  
SI 262144  
SF 376.4983660 MHz  
WDW EM  
SSB 0  
LB 0.30 Hz  
GB 0

PC 2.00

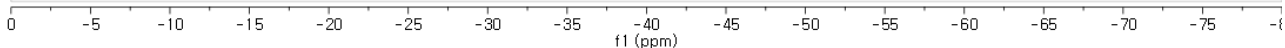

SS521-1A1  
mPROTON CDCI3 {e:\bruk400\data\2012\WSep} MG 15

NAME 2012-09-16-MG-15  
EXPNO 10  
PROCNO 1  
Date\_ 20120916  
Time 12.52  
INSTRUM AV400  
PROBHD 5 mm PABBO BB-  
PULPROG zg30b  
TD 65536  
SOLVENT CDCI3  
NS 16  
DS 0  
SWH 8264.463 Hz  
FIDRES 0.126106 Hz  
AQ 3.9649780 sec  
RG 144  
DW 60.500 usec  
DE 9.40 usec  
TE 294.9 K  
D1 1.00000000 sec  
TD0 1

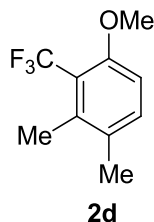

===== CHANNEL f1 =====  
NUC1 1H  
P1 10.00 usec  
PL1 -3.60 dB  
PL1W 17.83863831 W  
SFO1 400.1324710 MHz  
SI 32768  
SF 400.1300450 MHz  
WDW EM  
SSB 0  
LB 0.30 Hz  
GB 0

PC 1.00

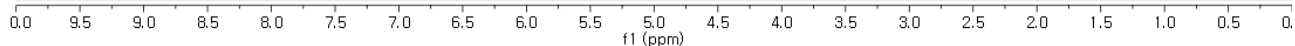

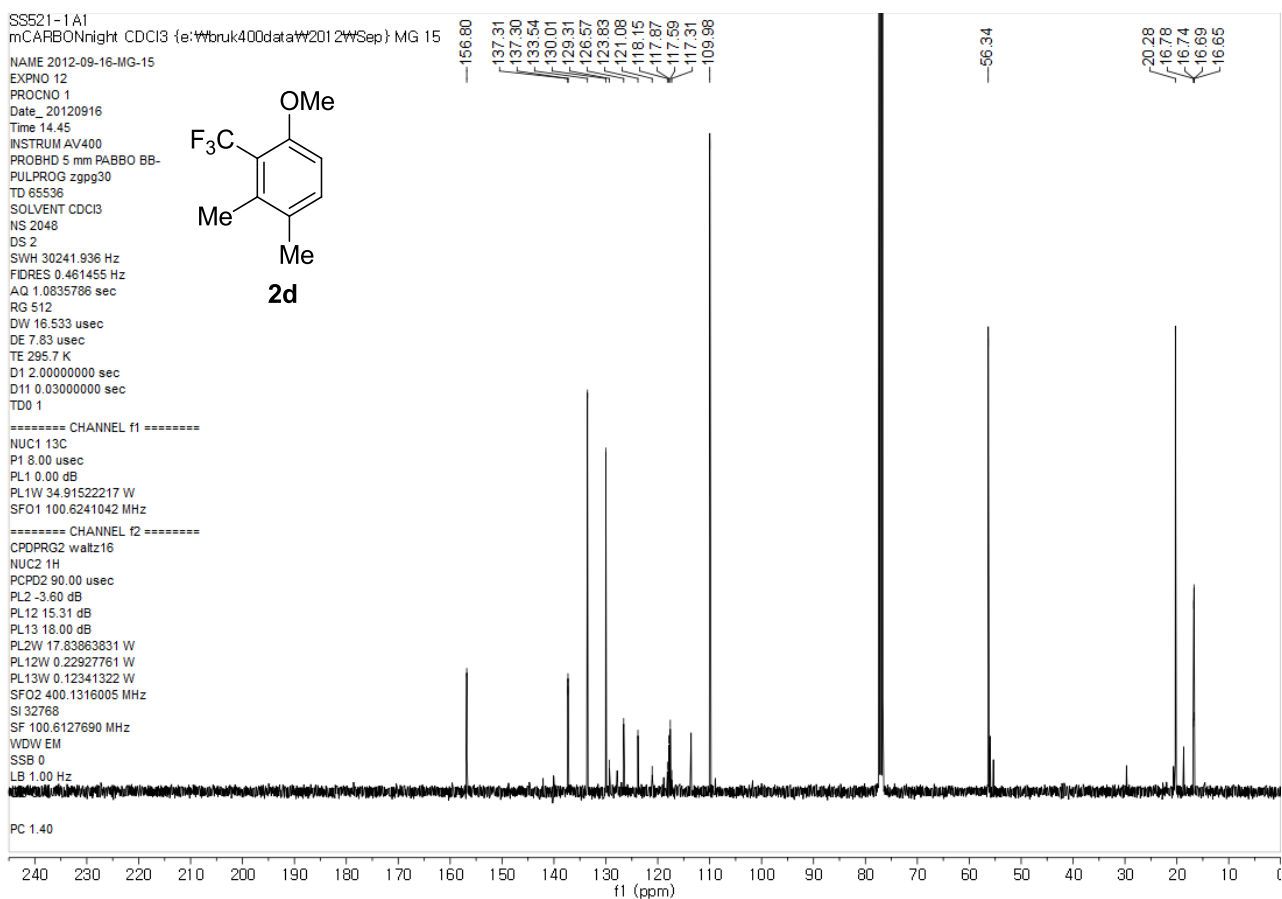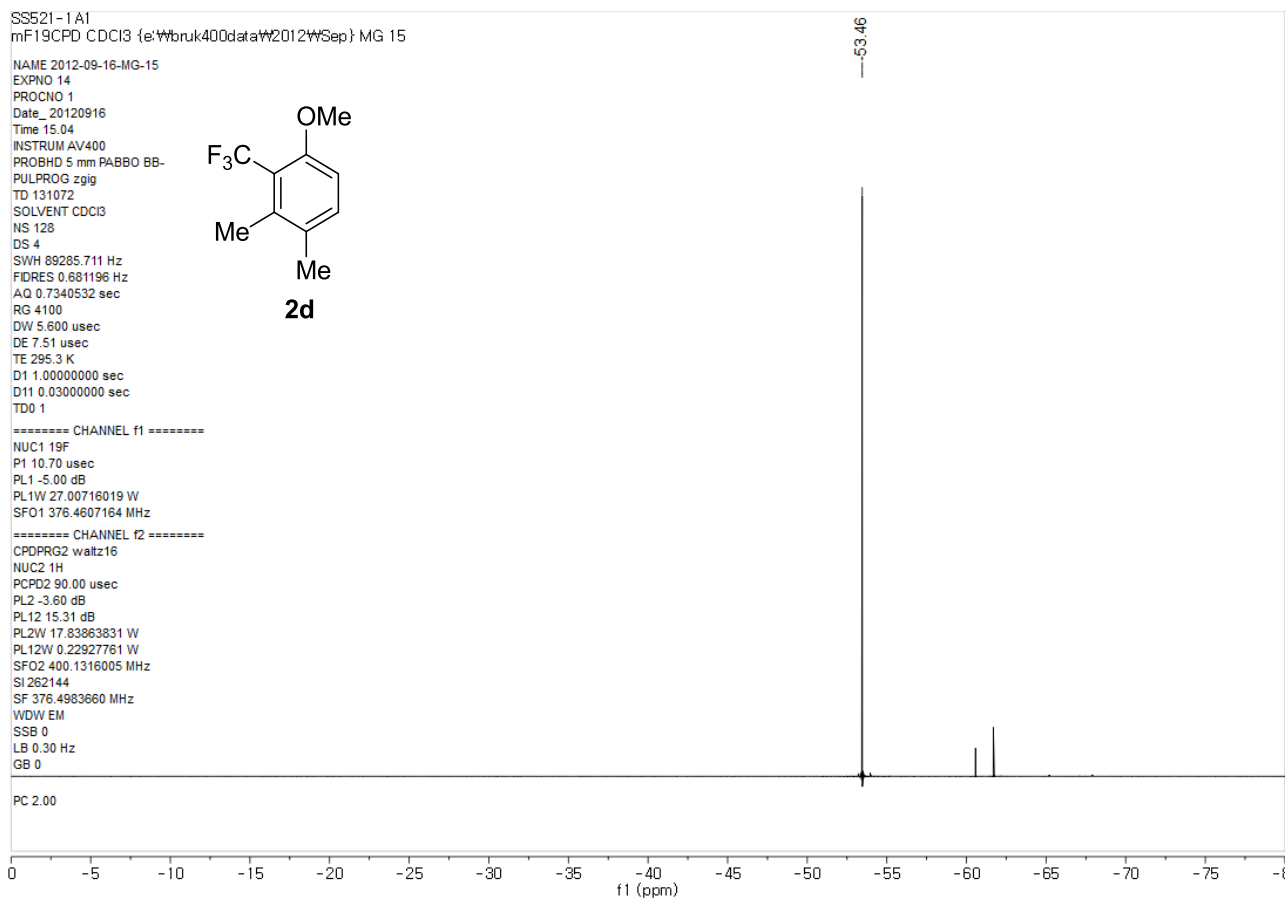

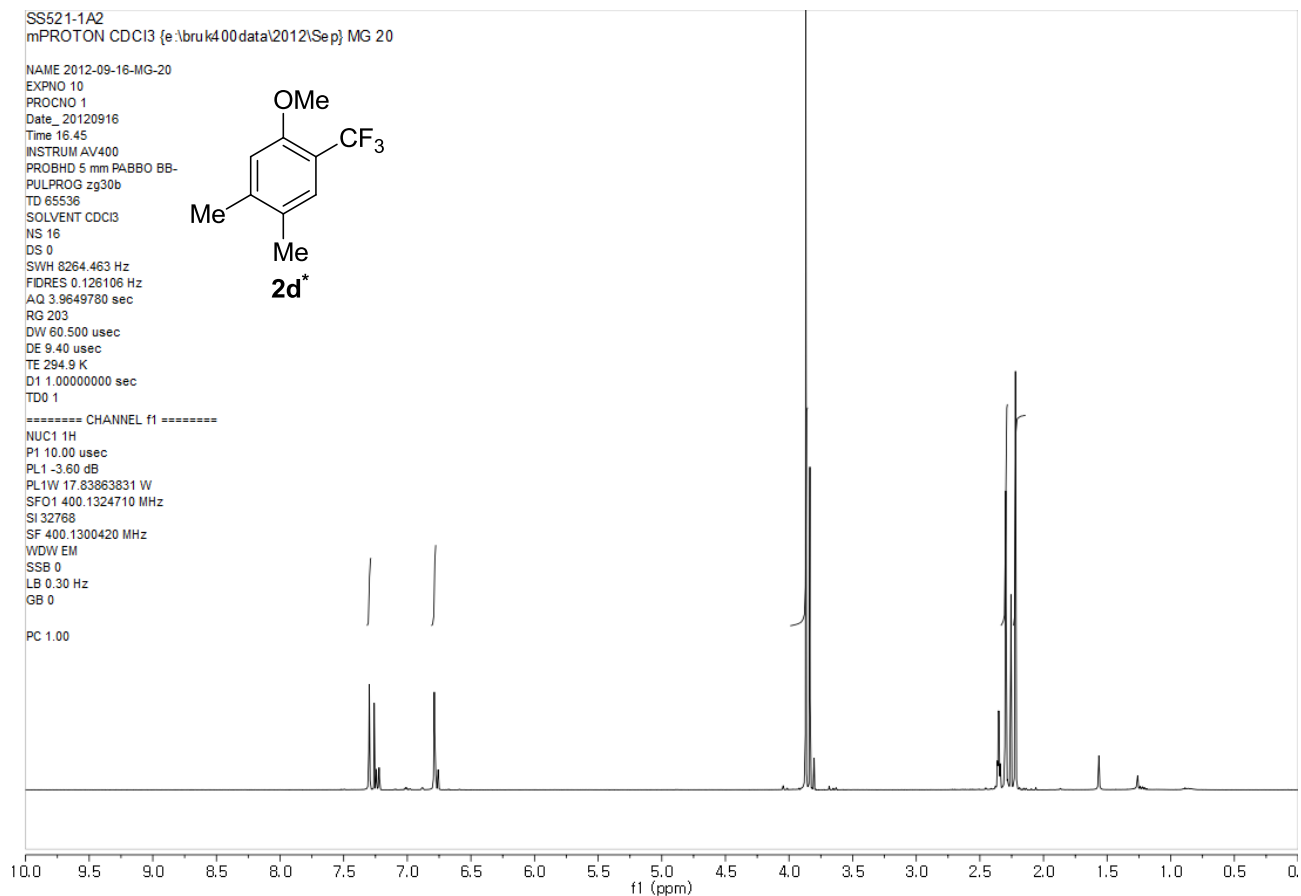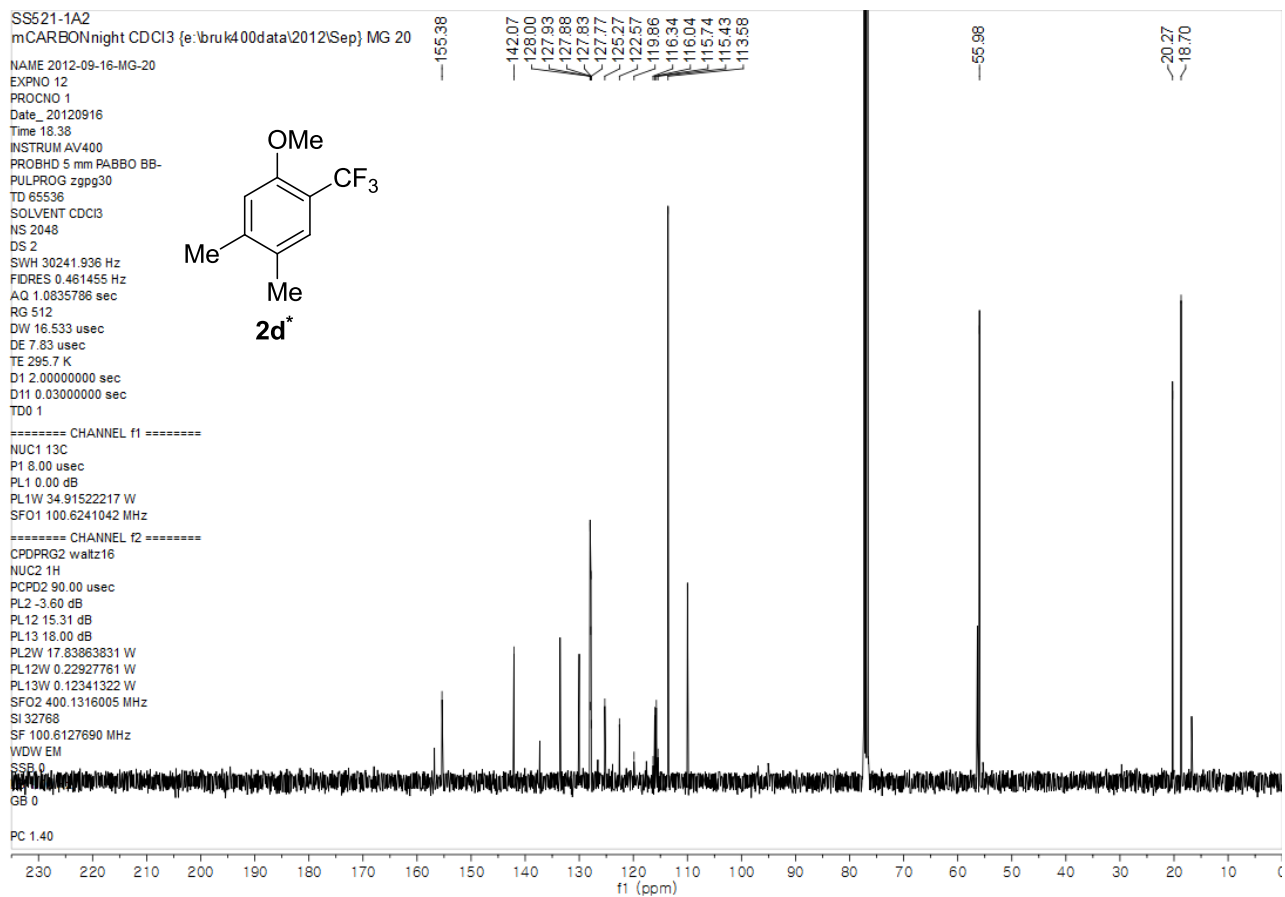



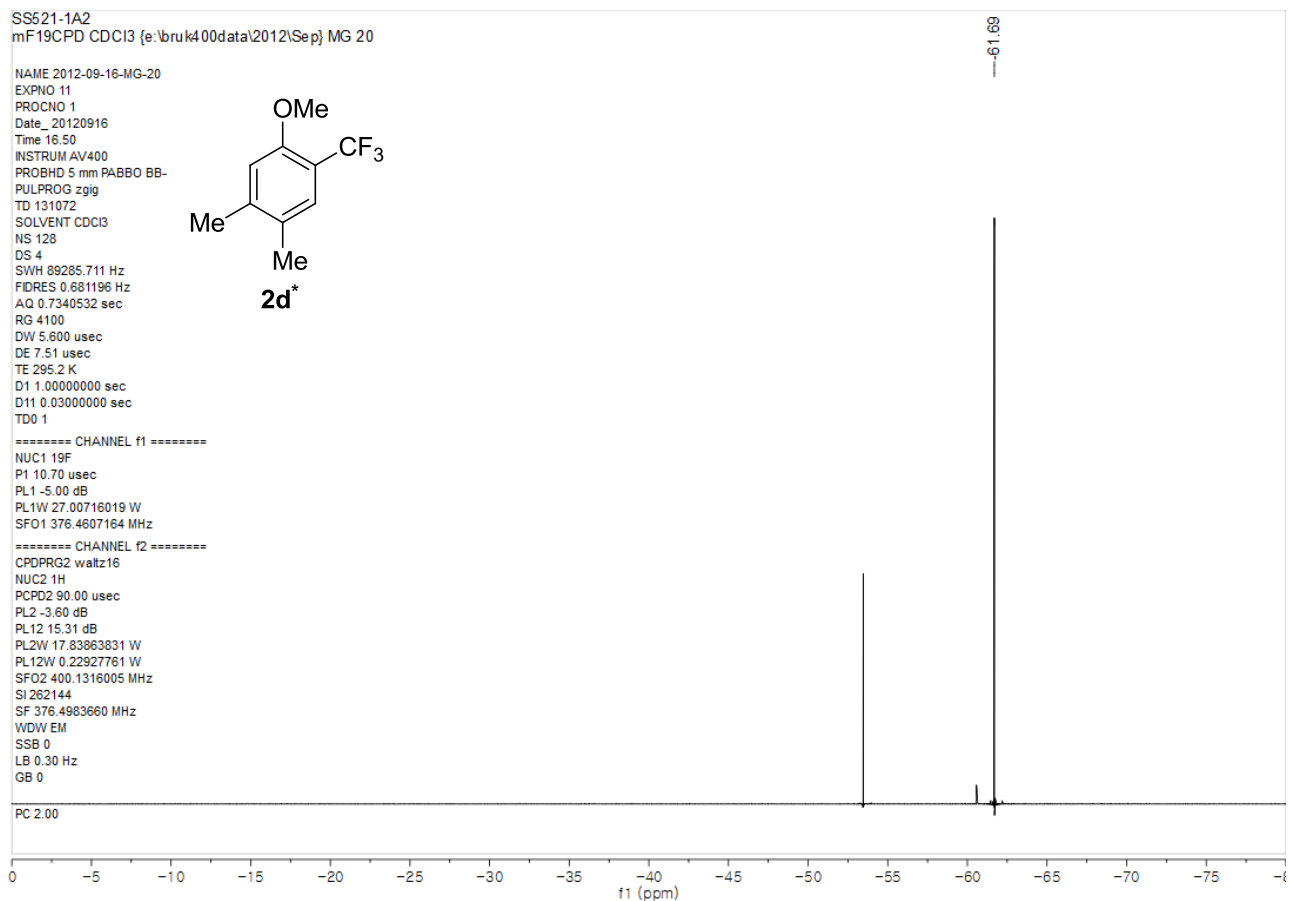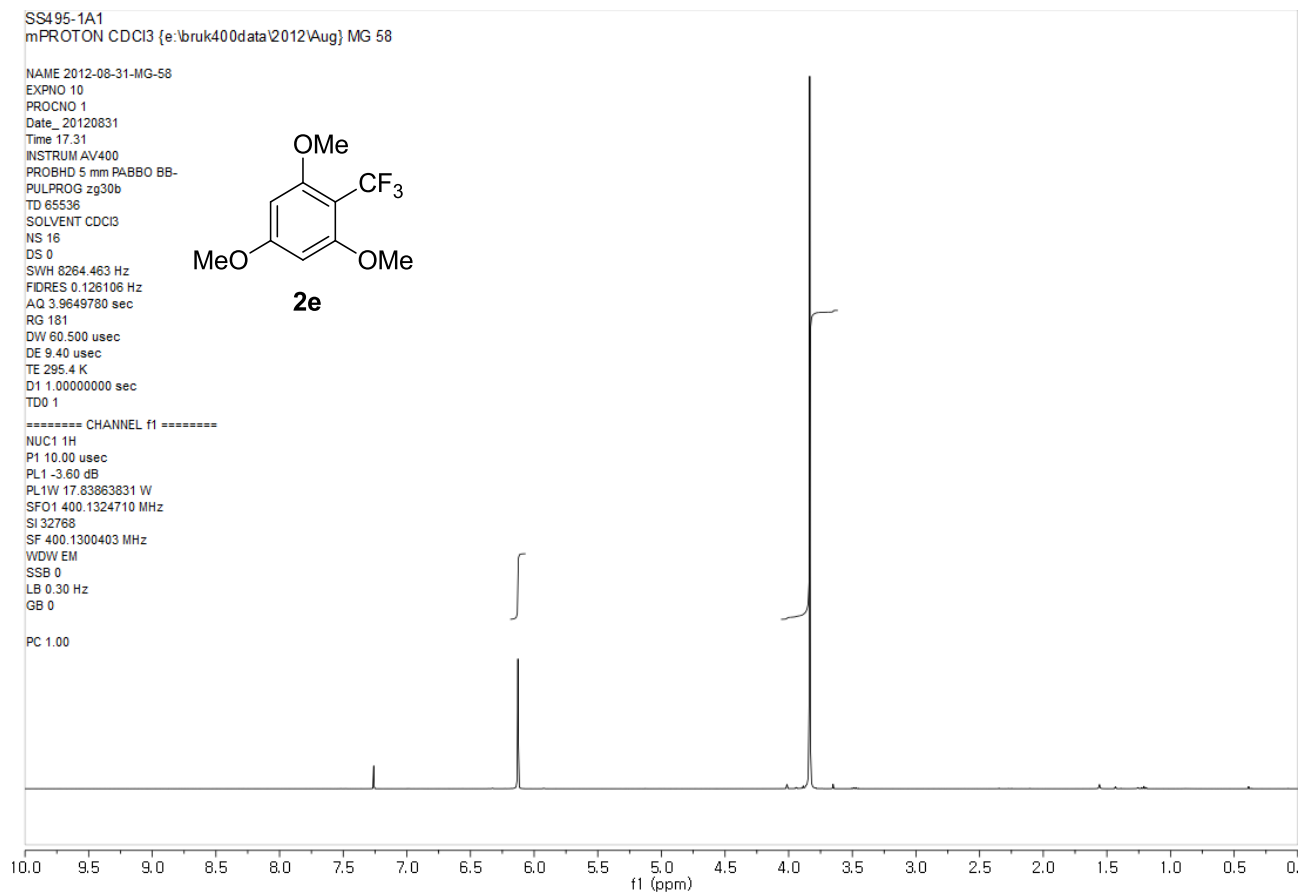

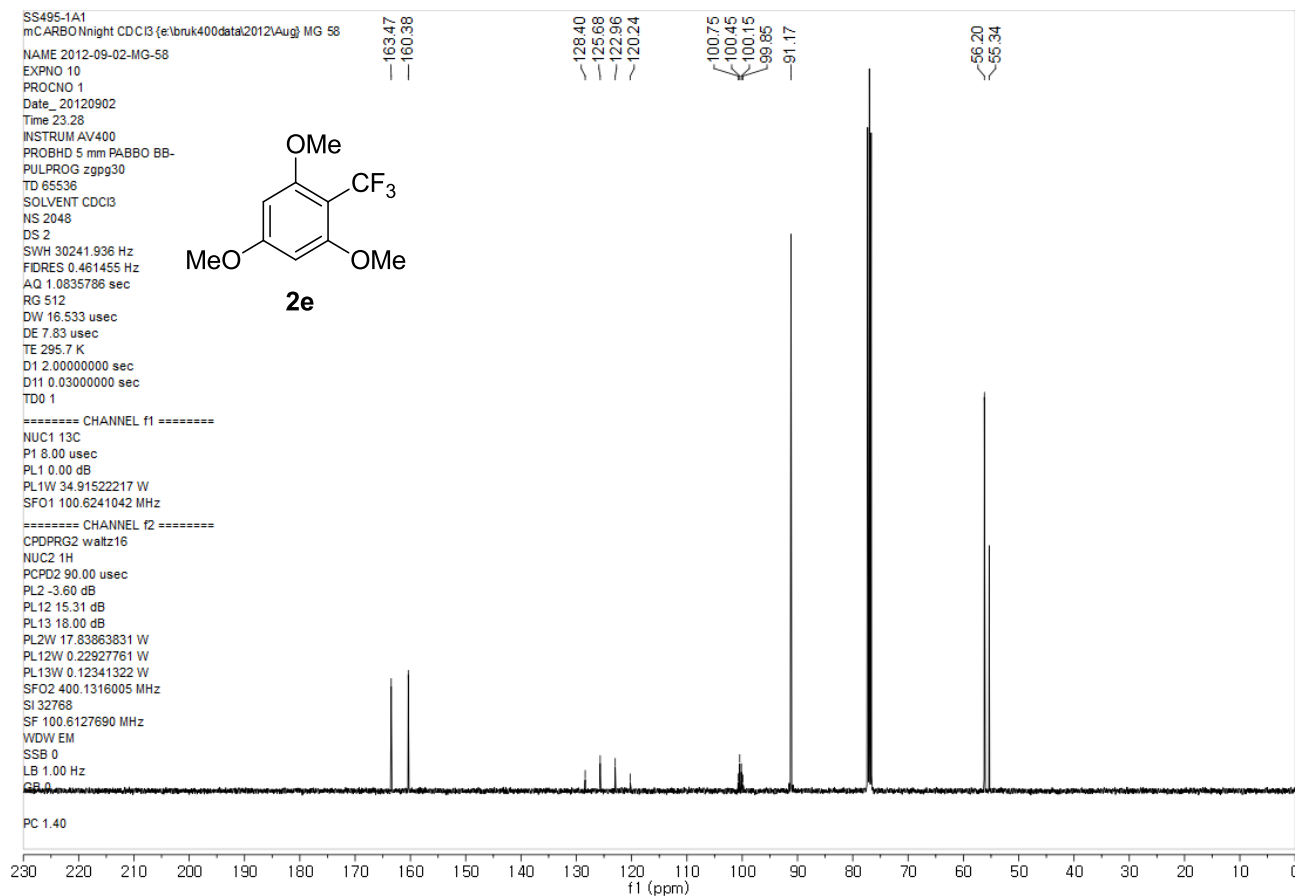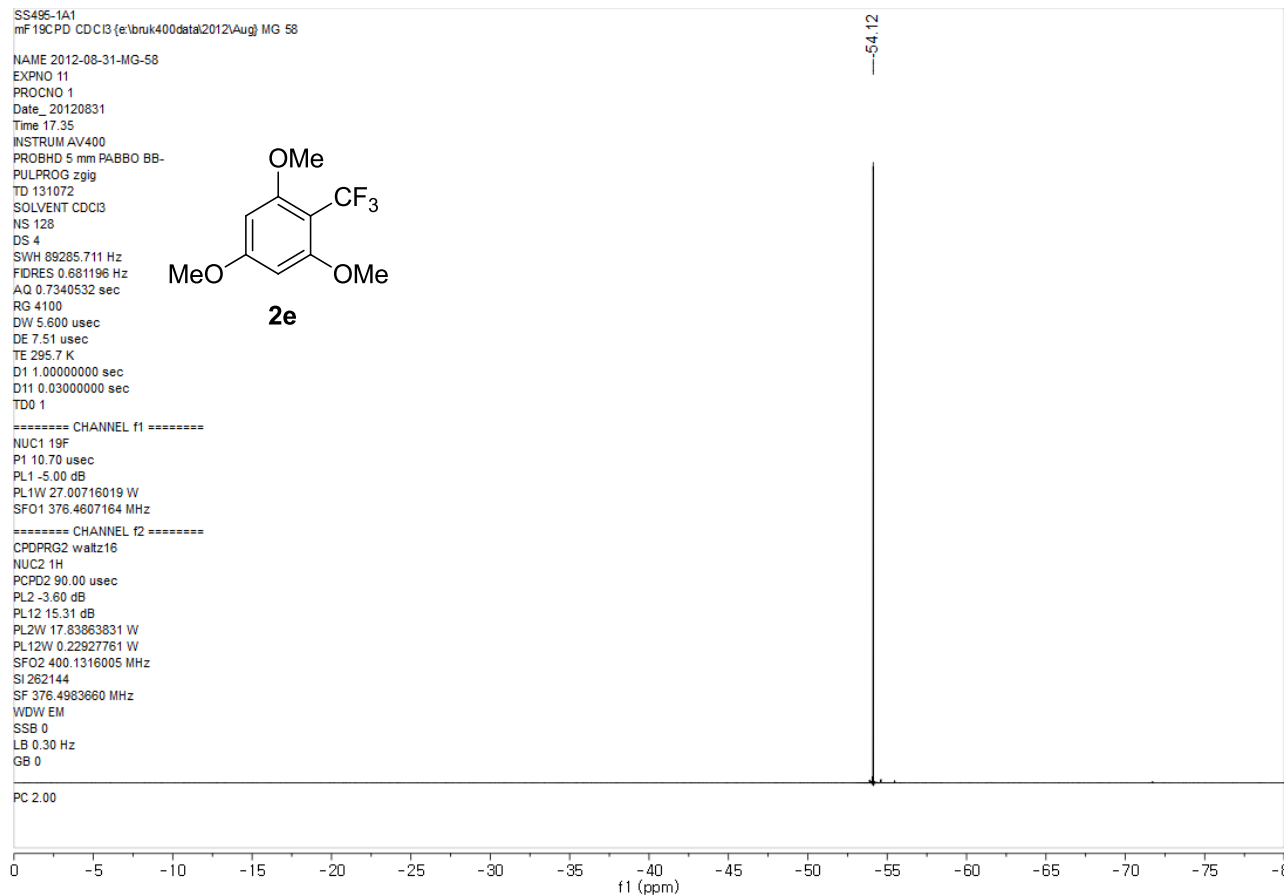

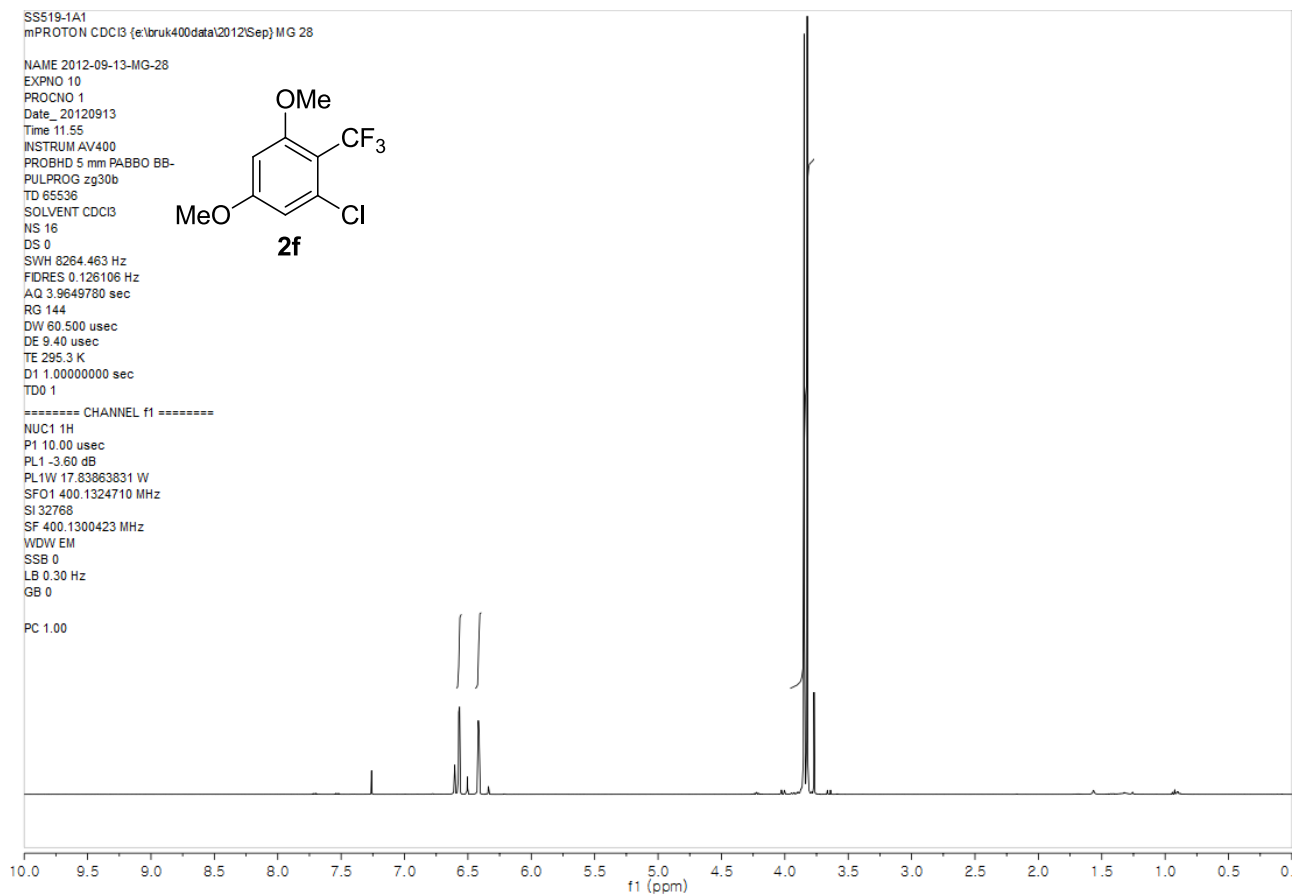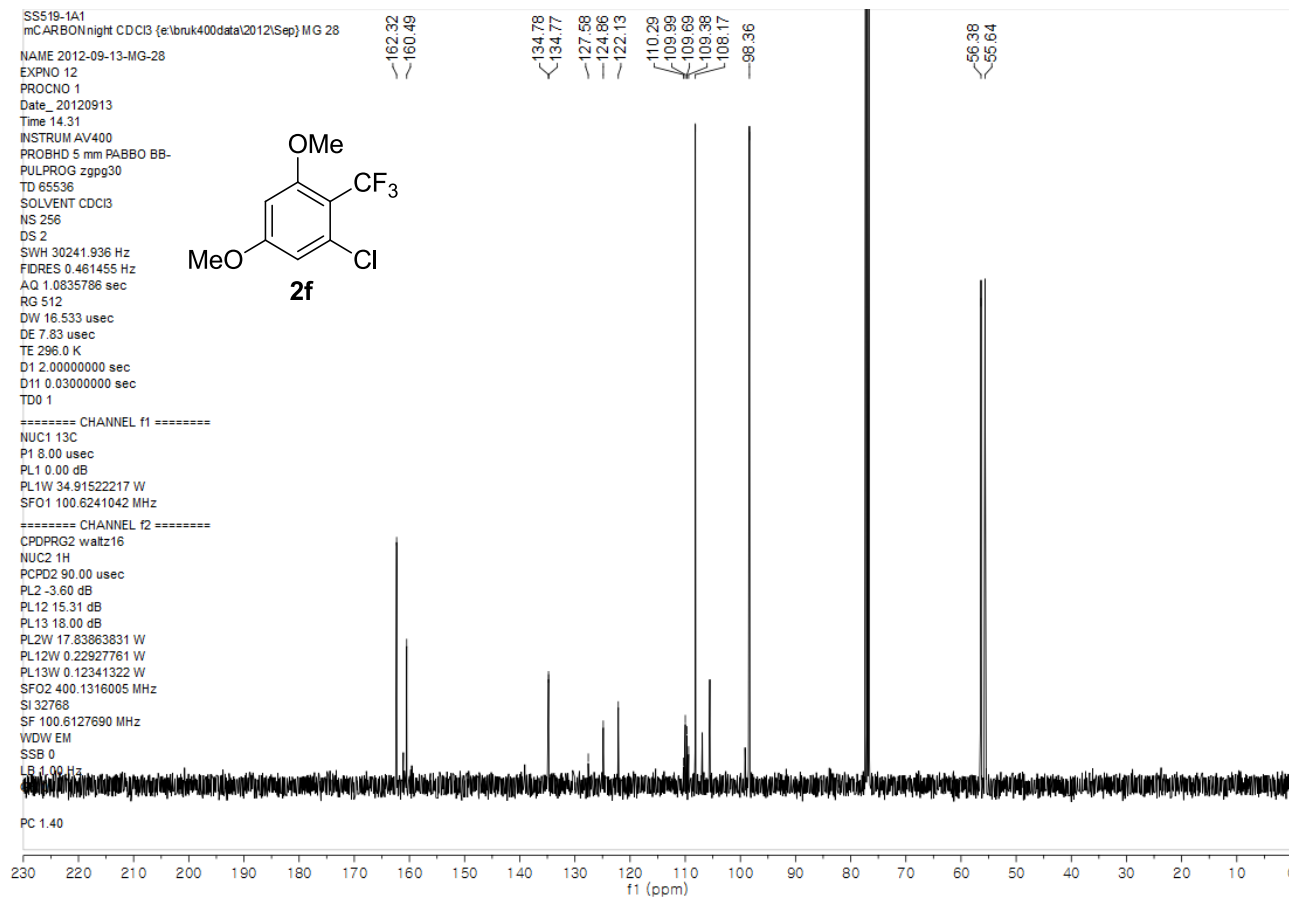

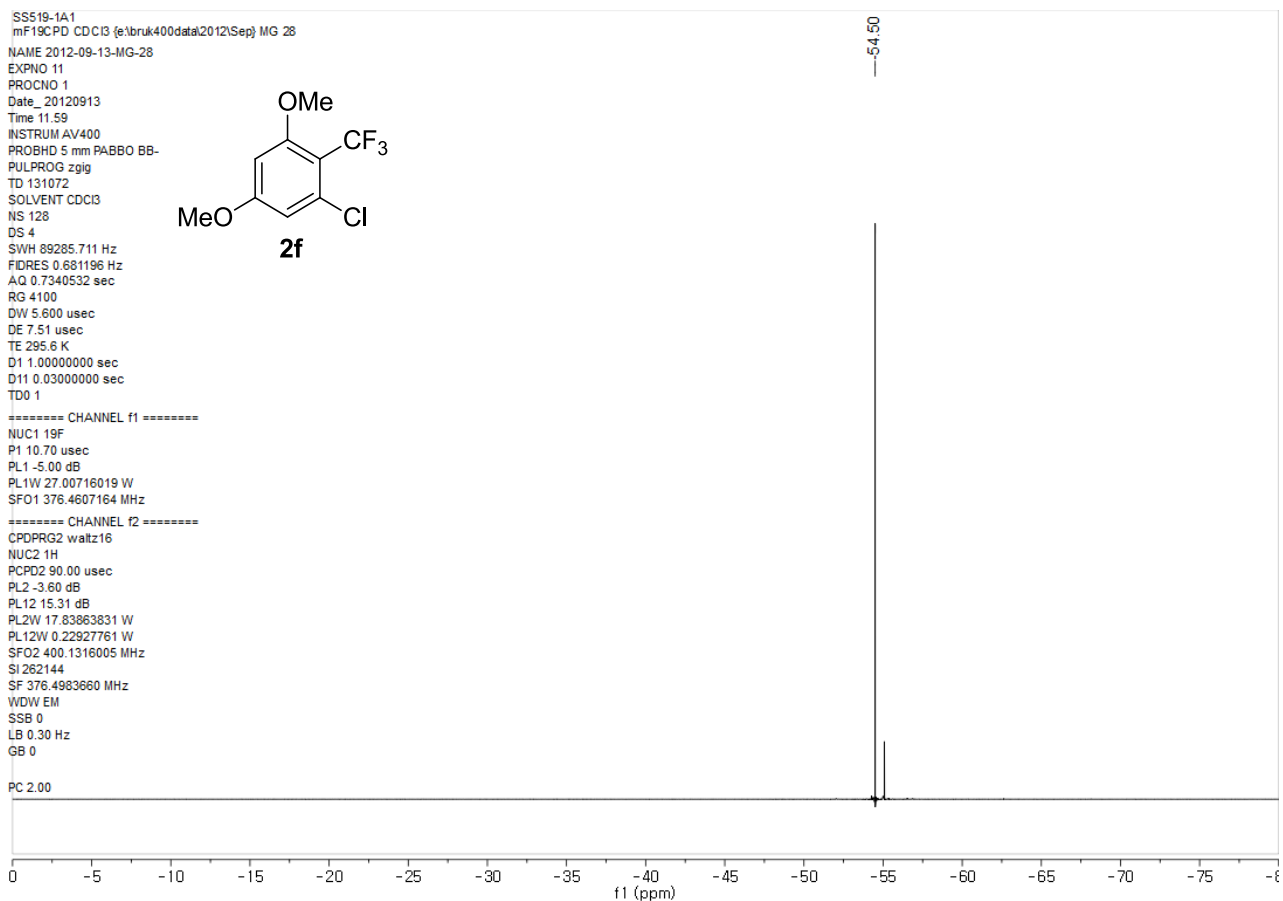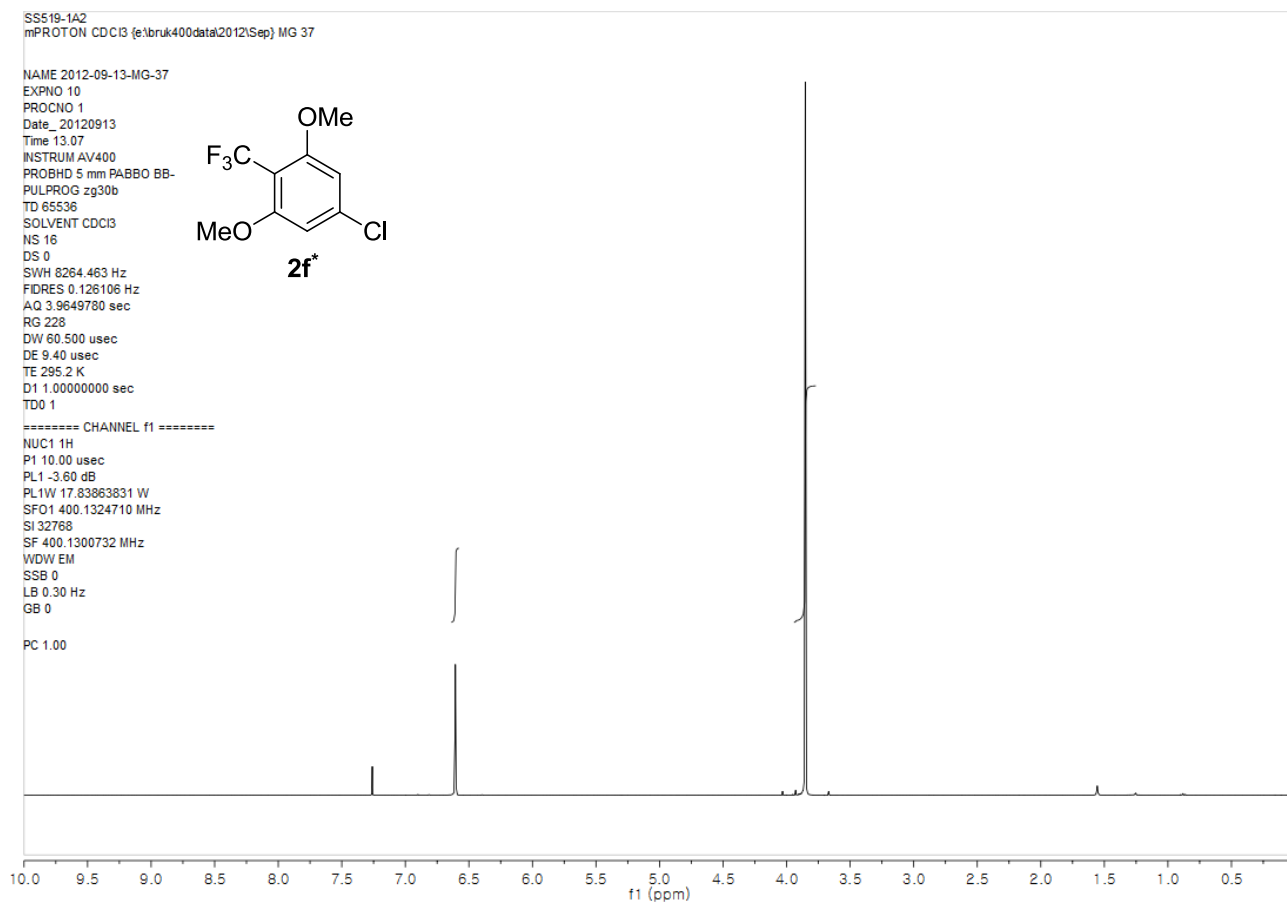

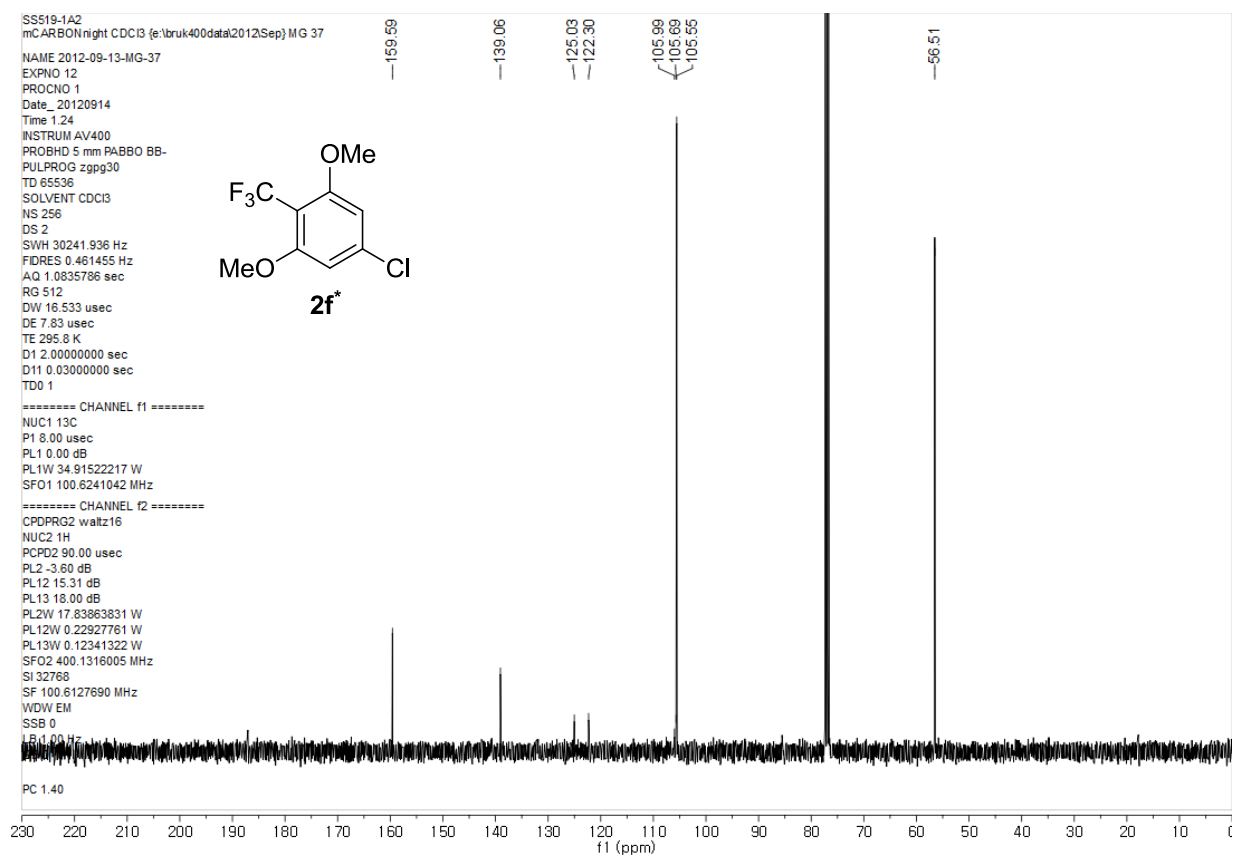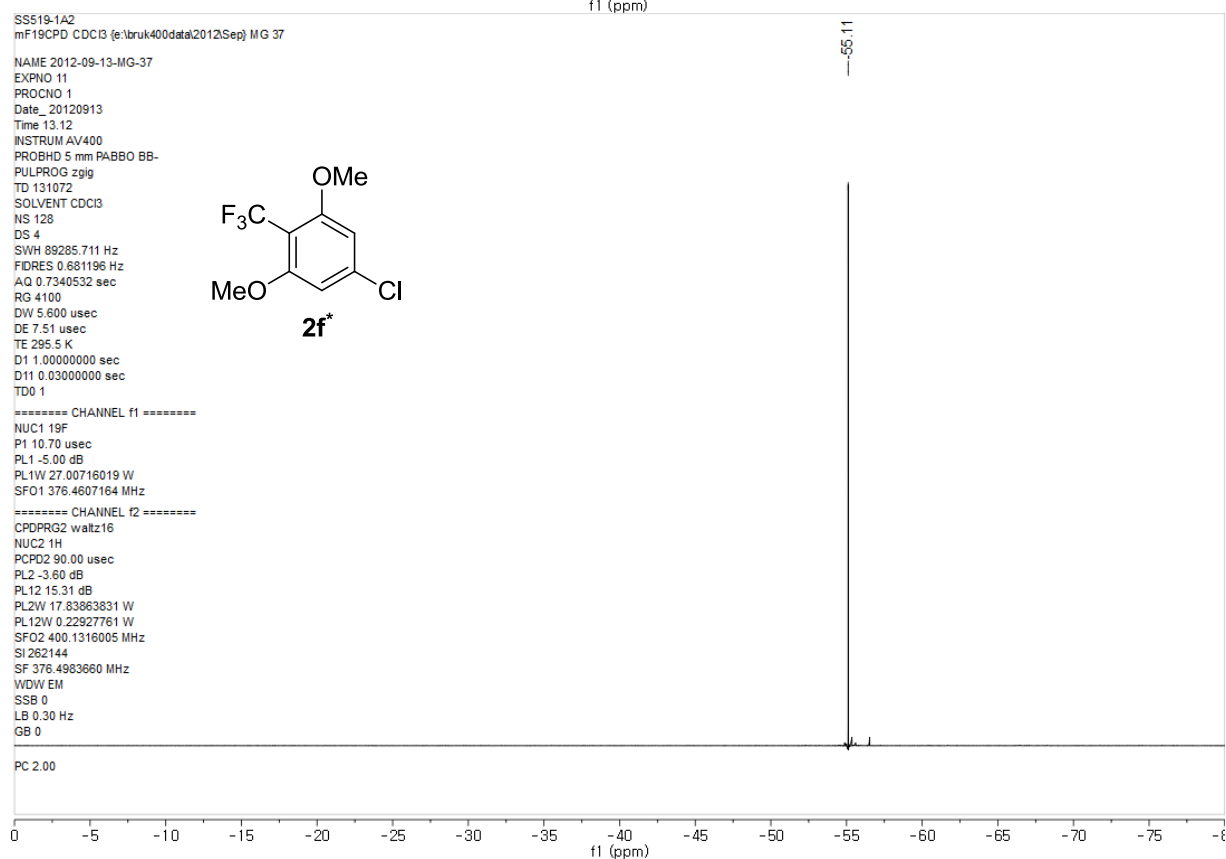

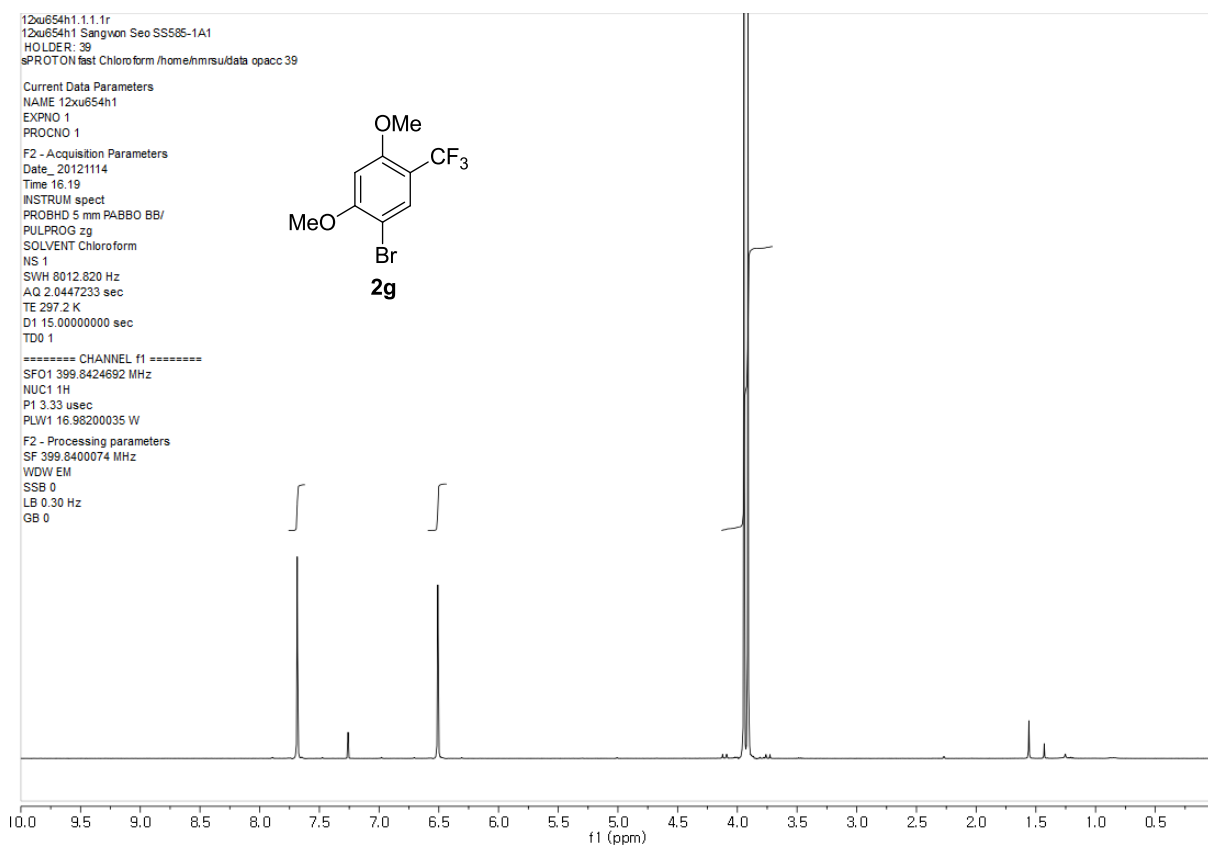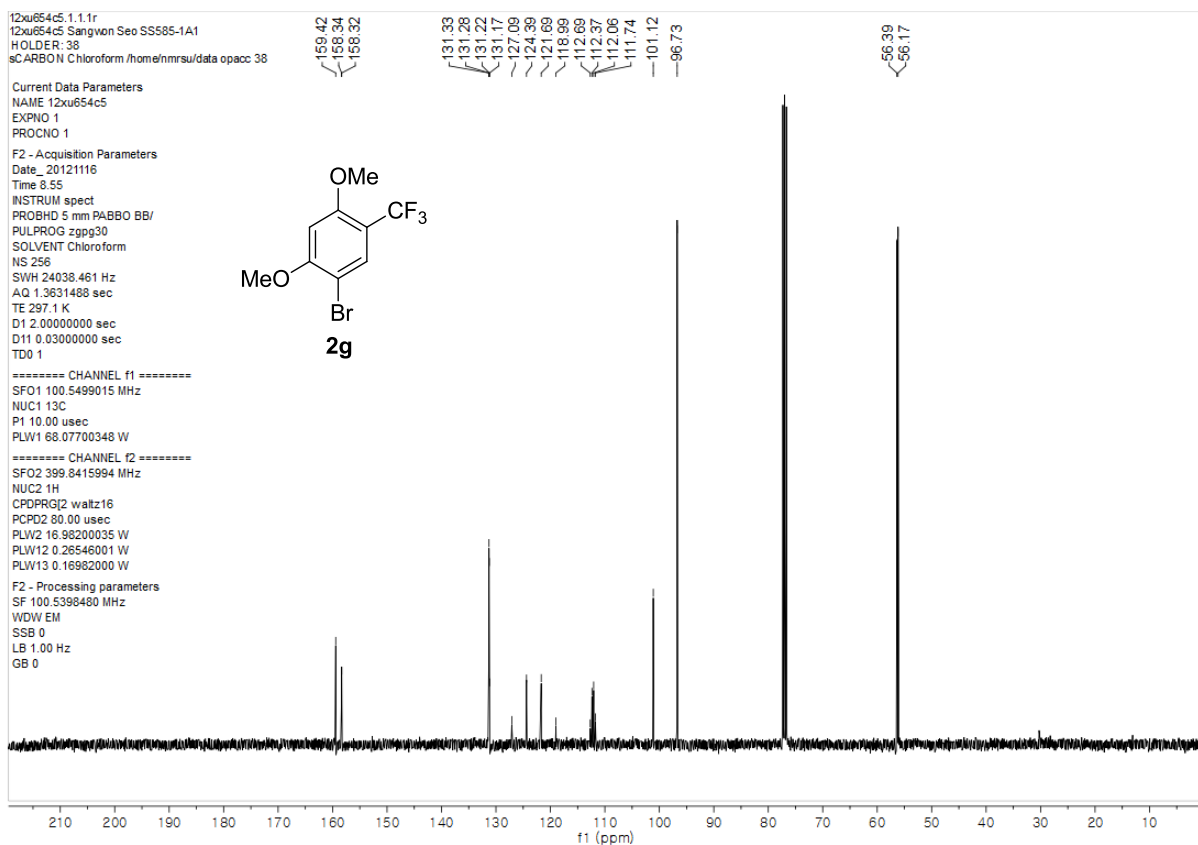

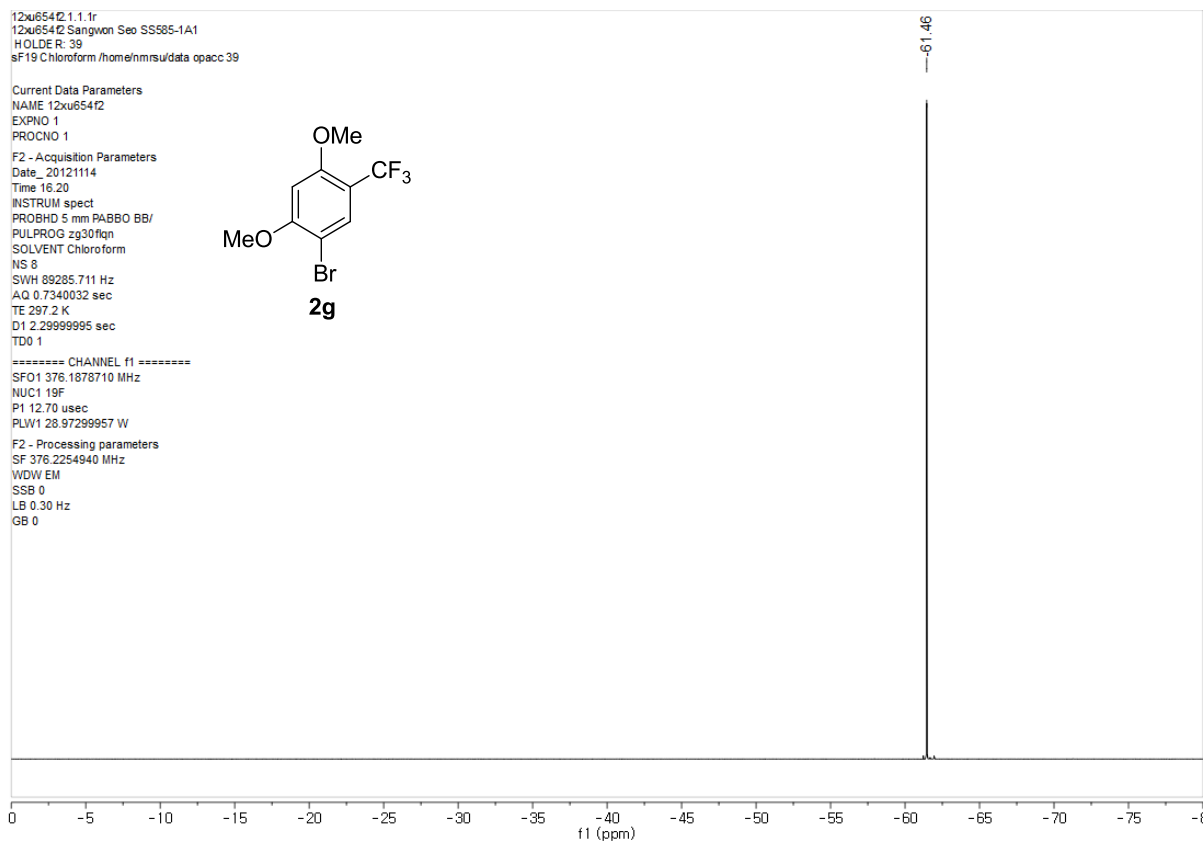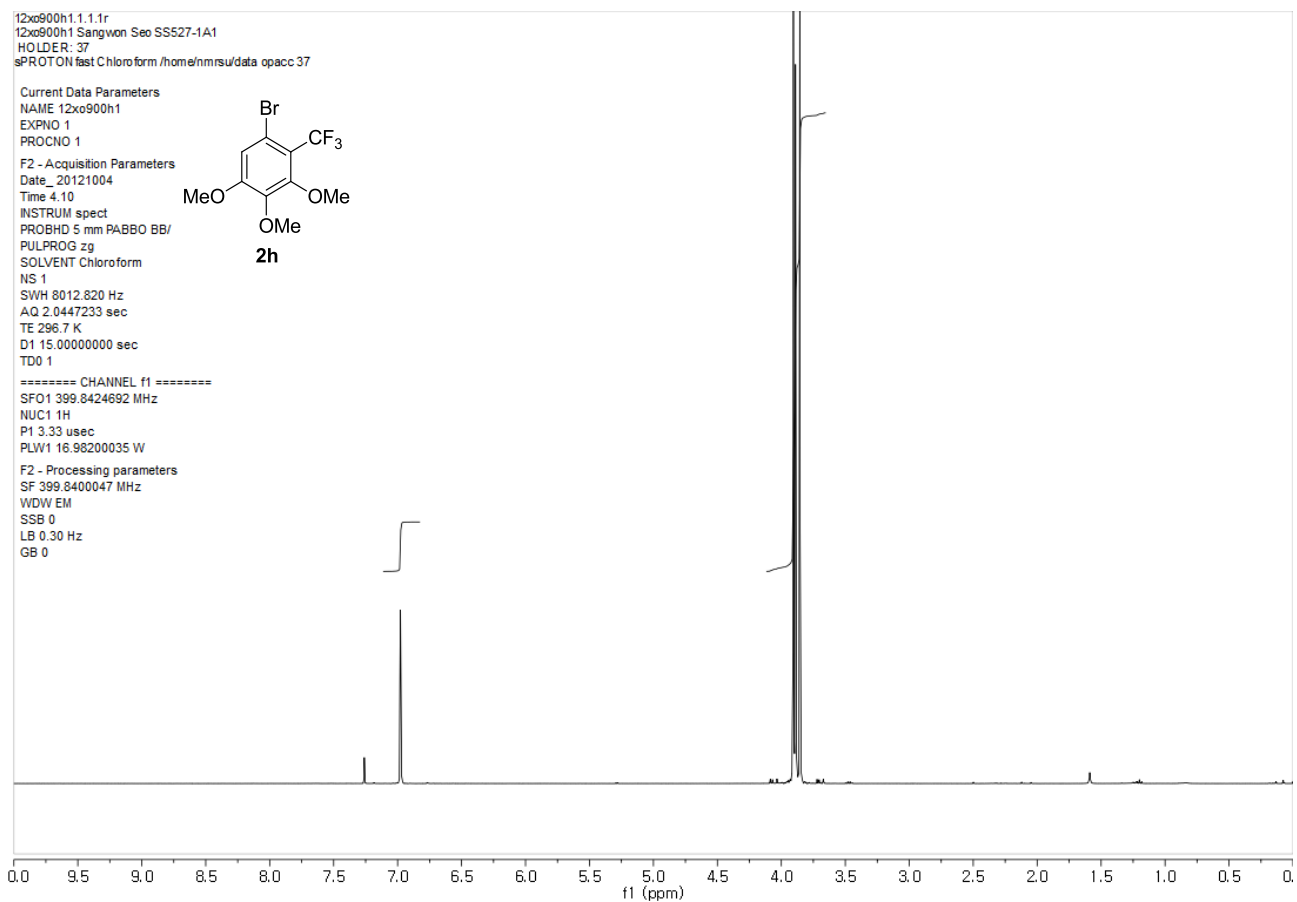

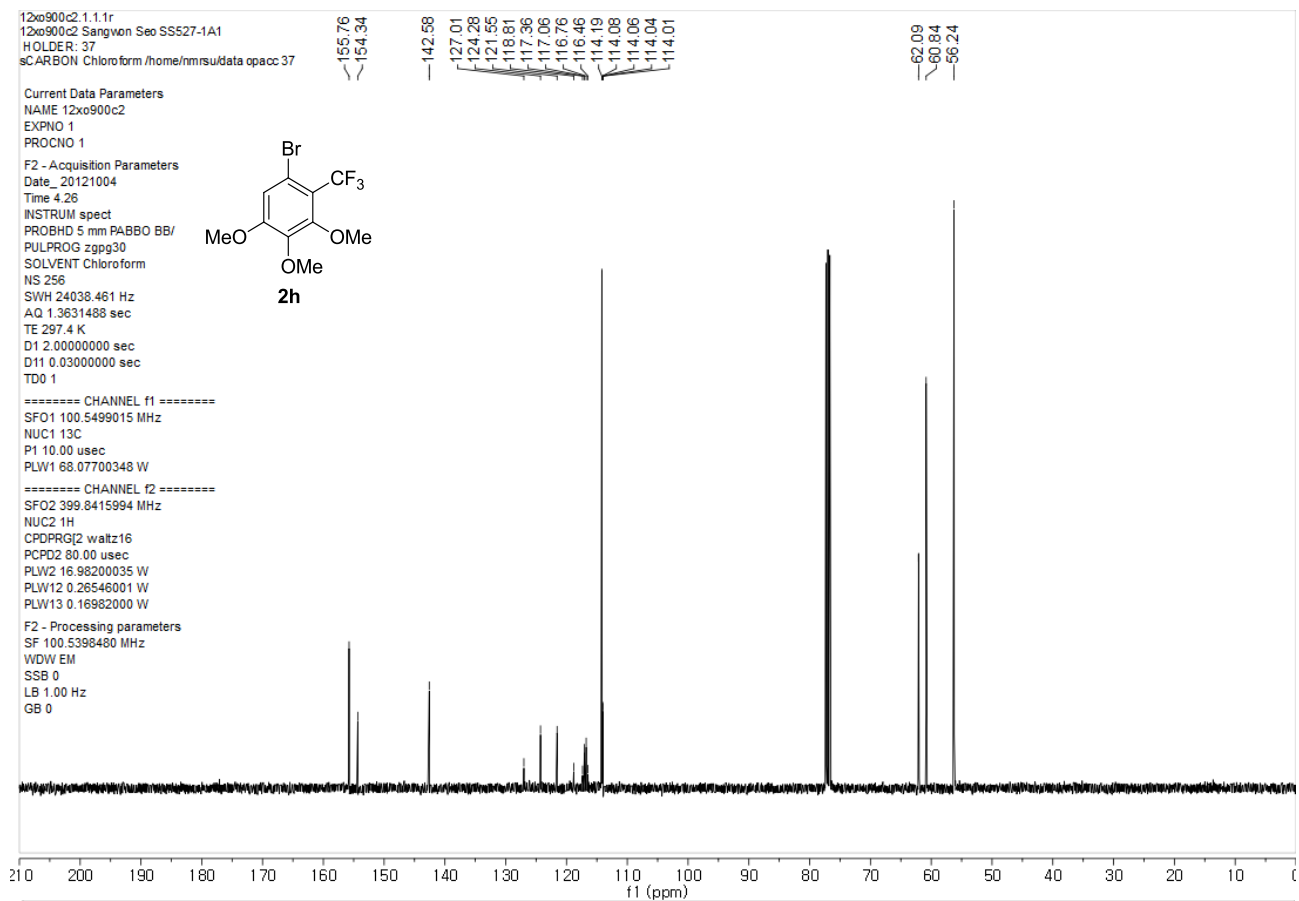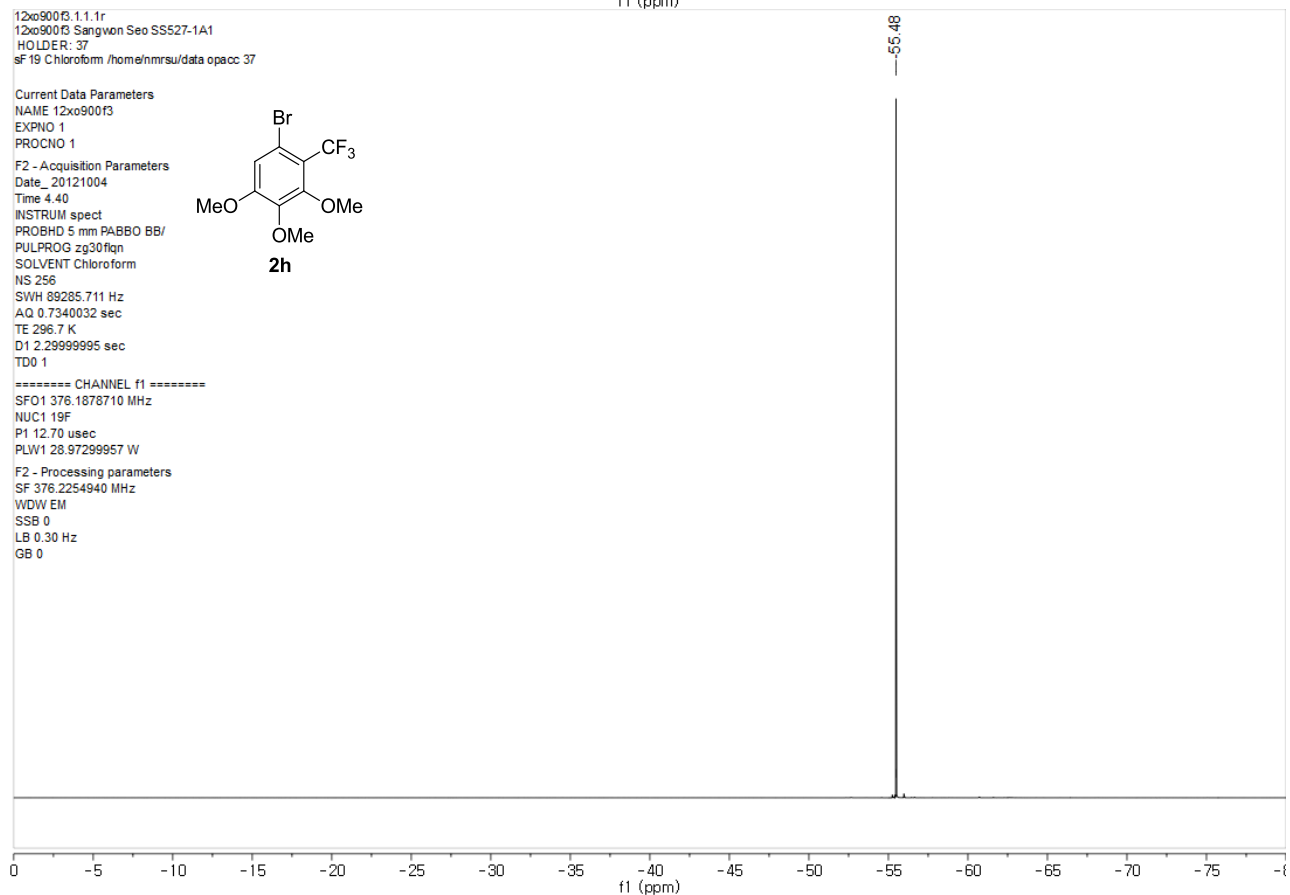



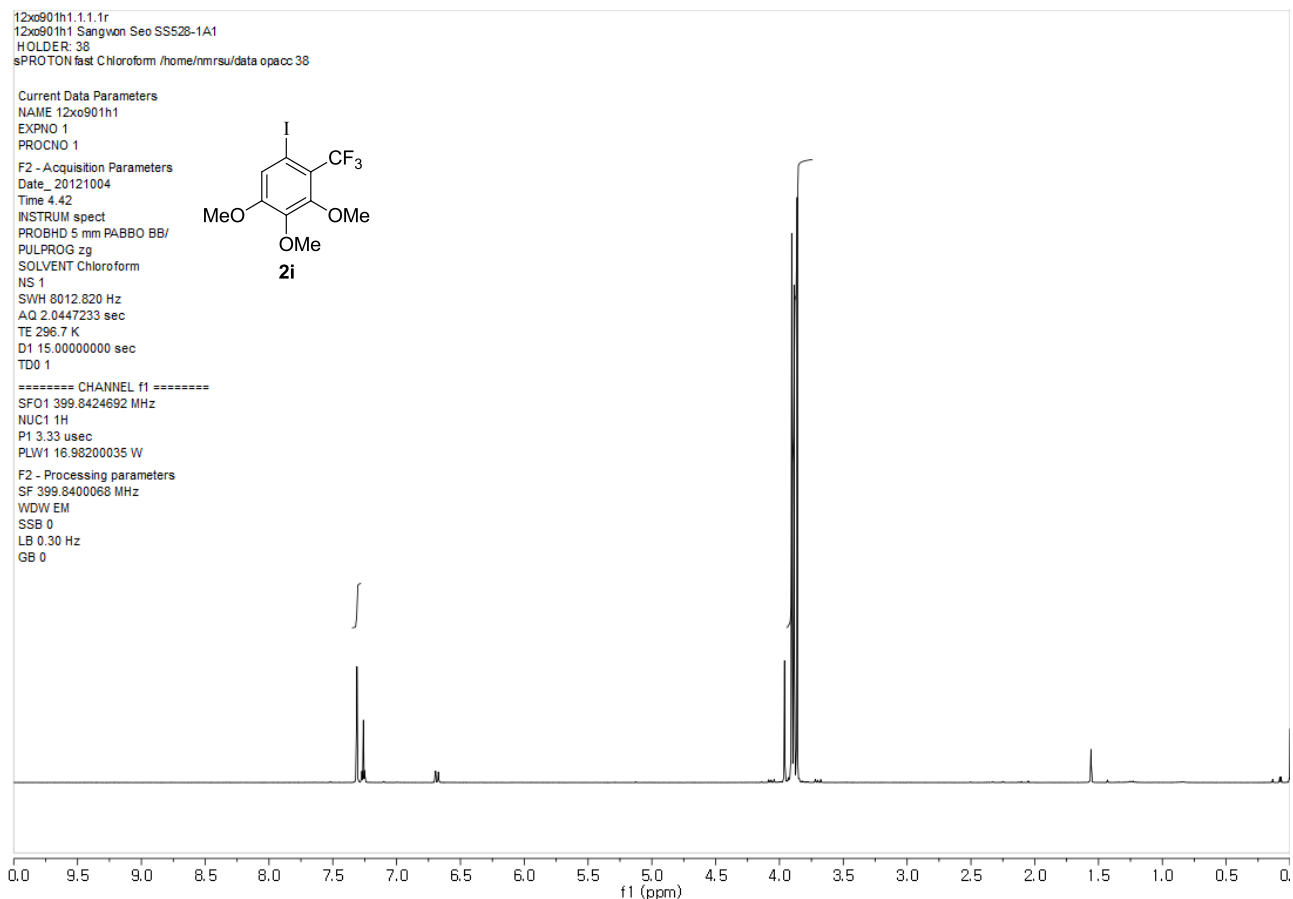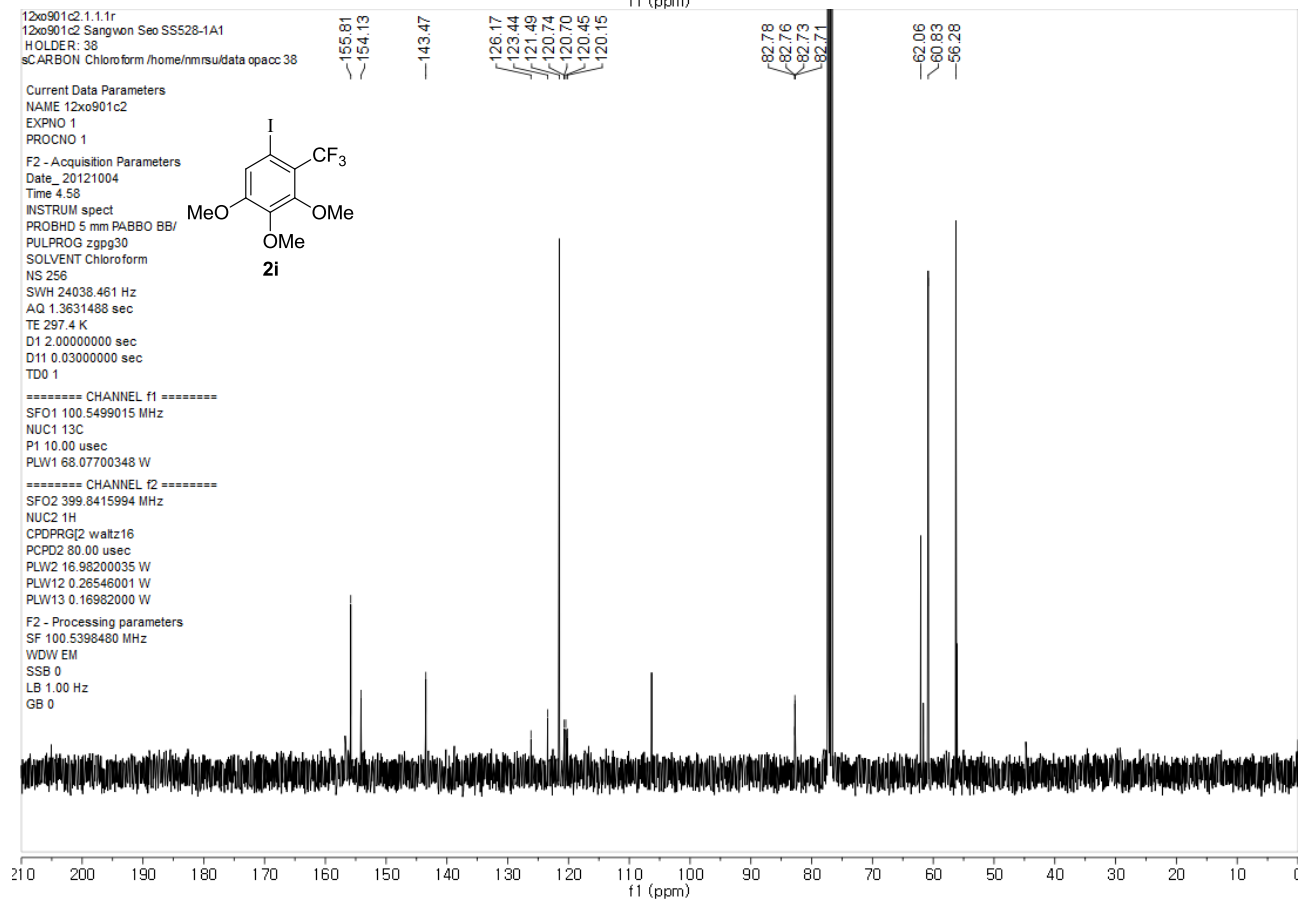

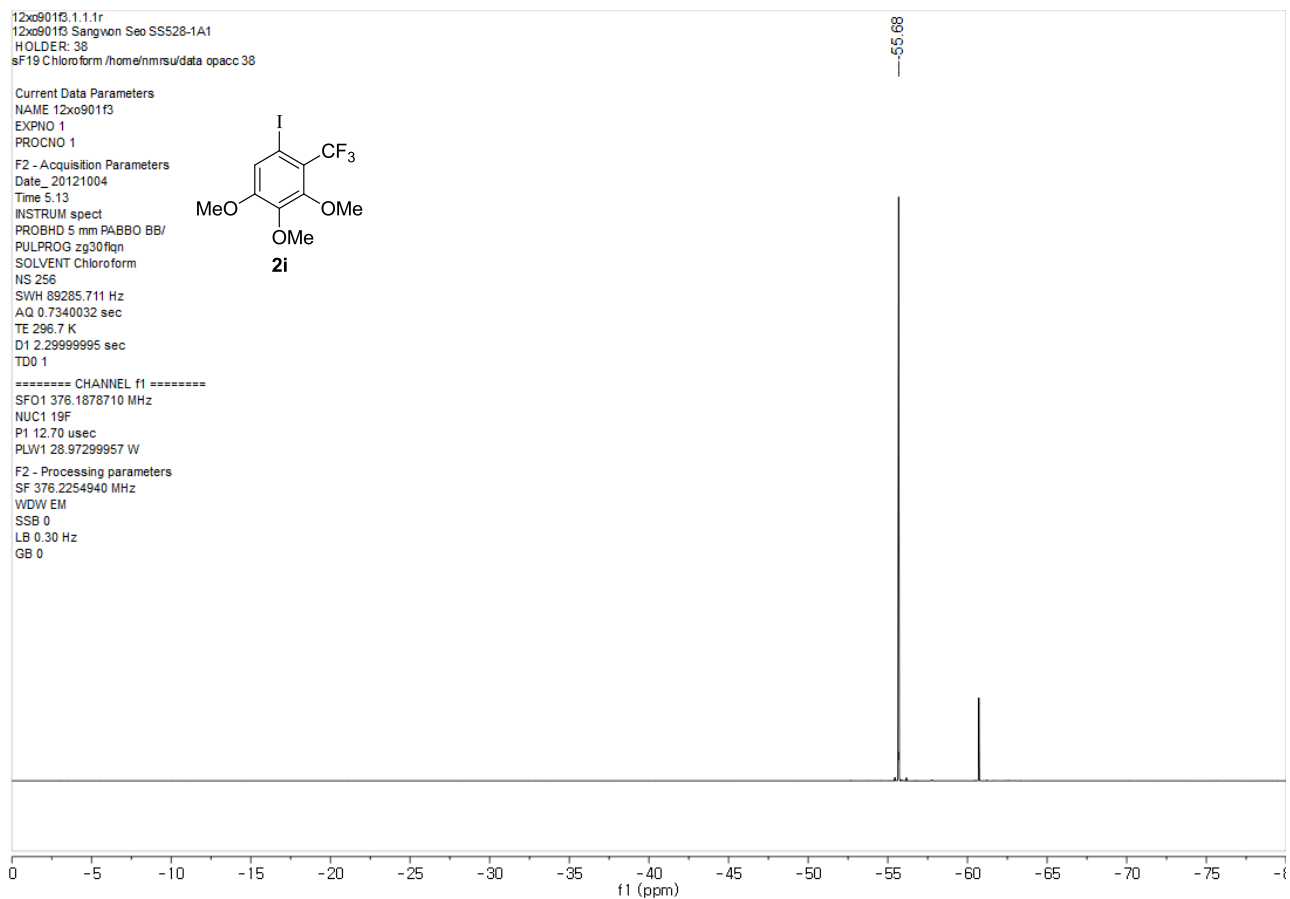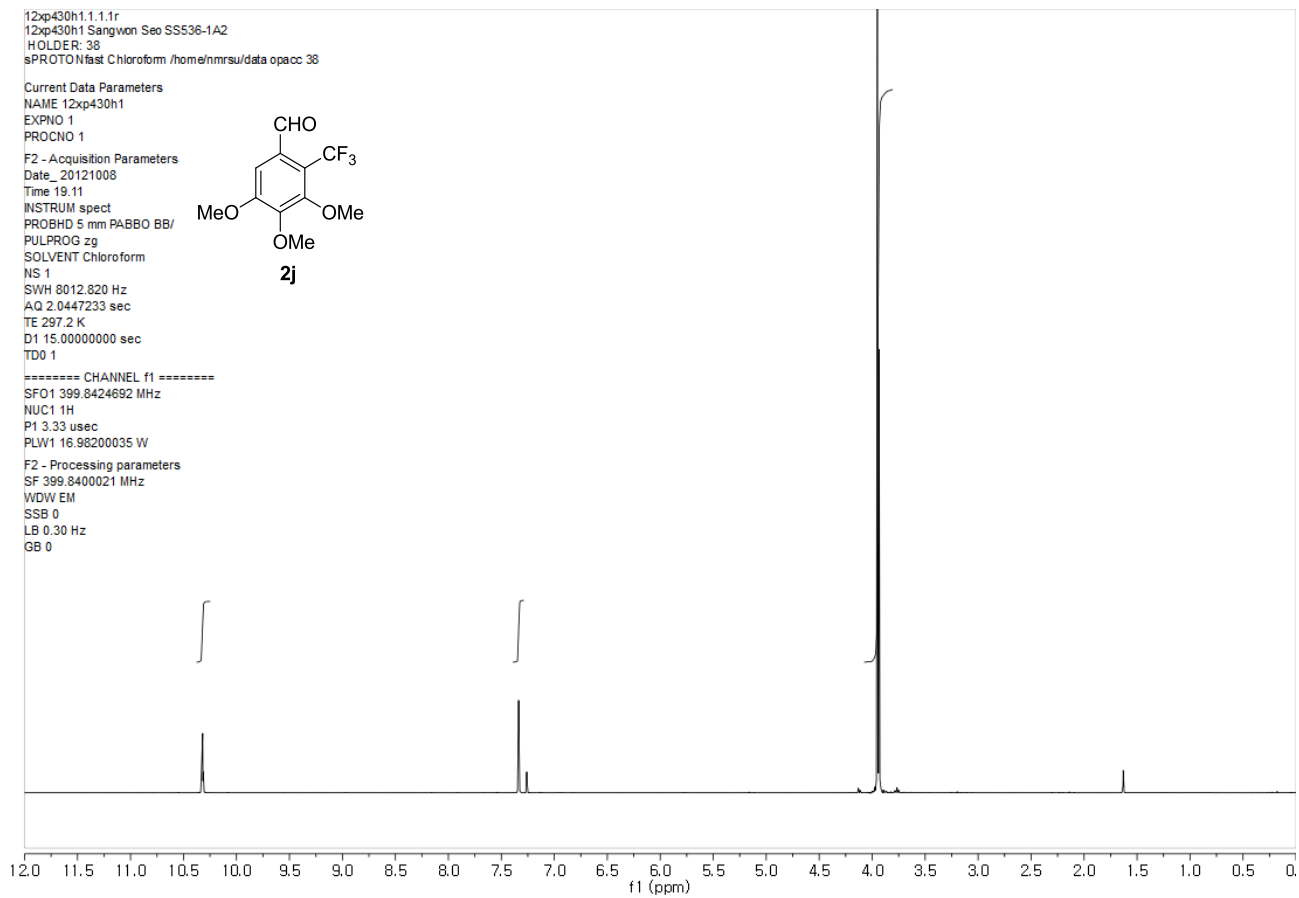

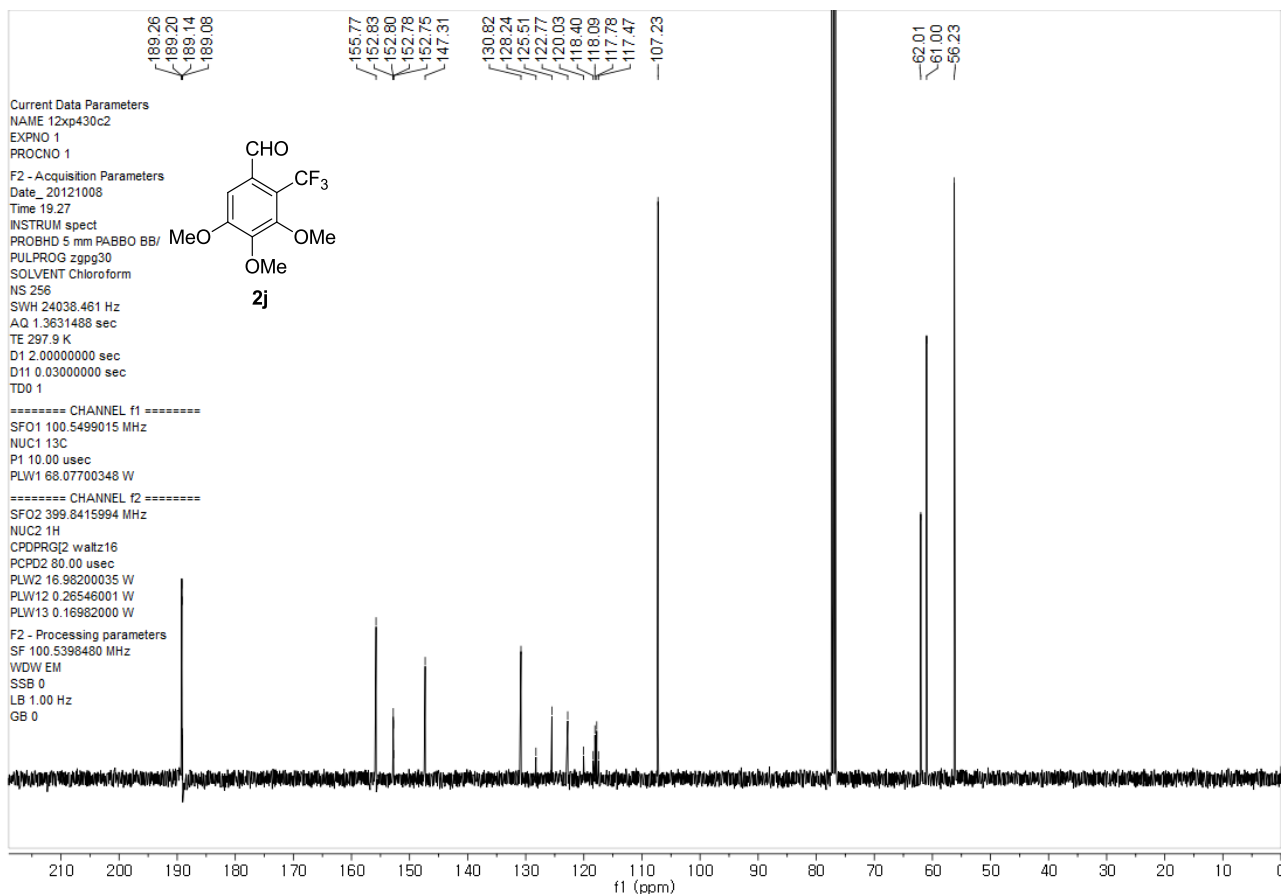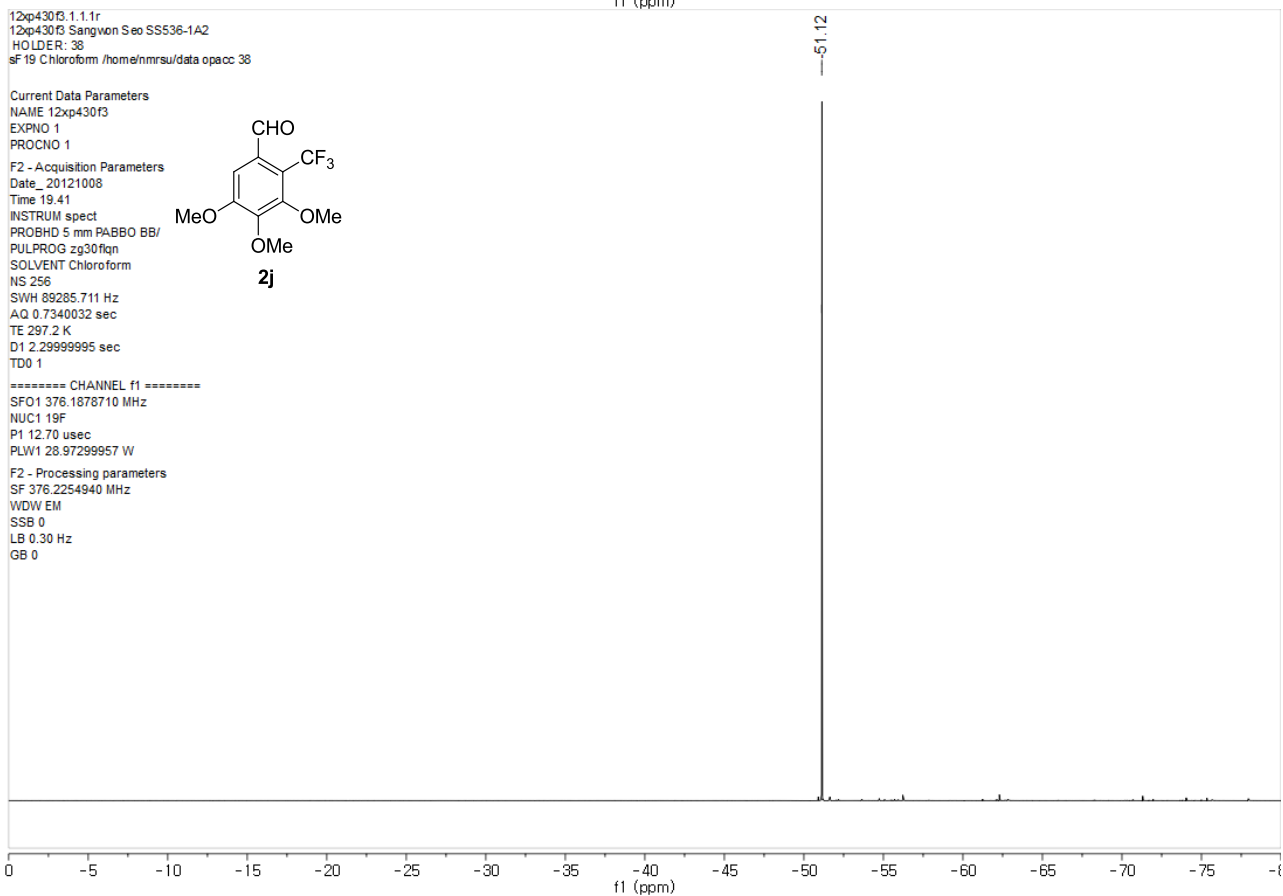

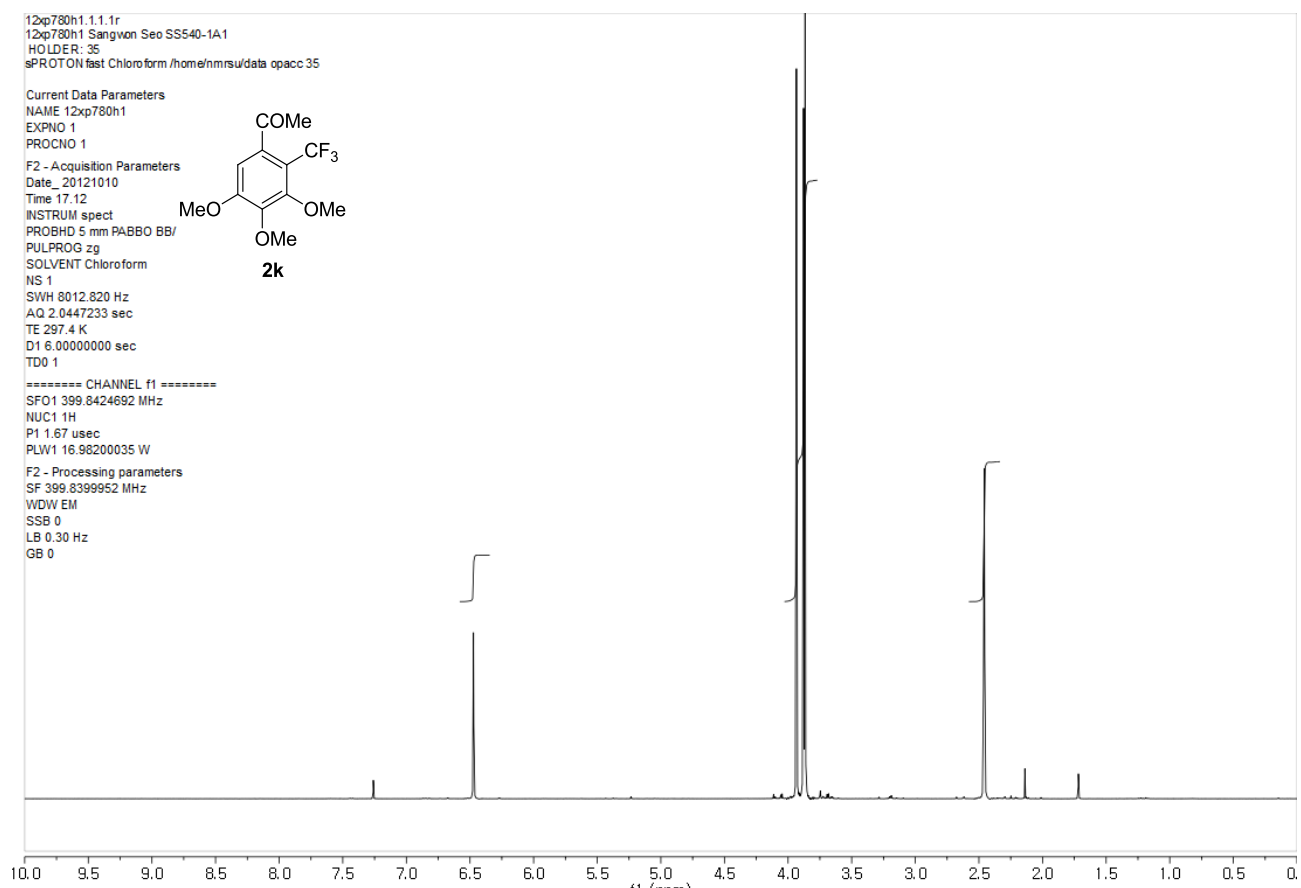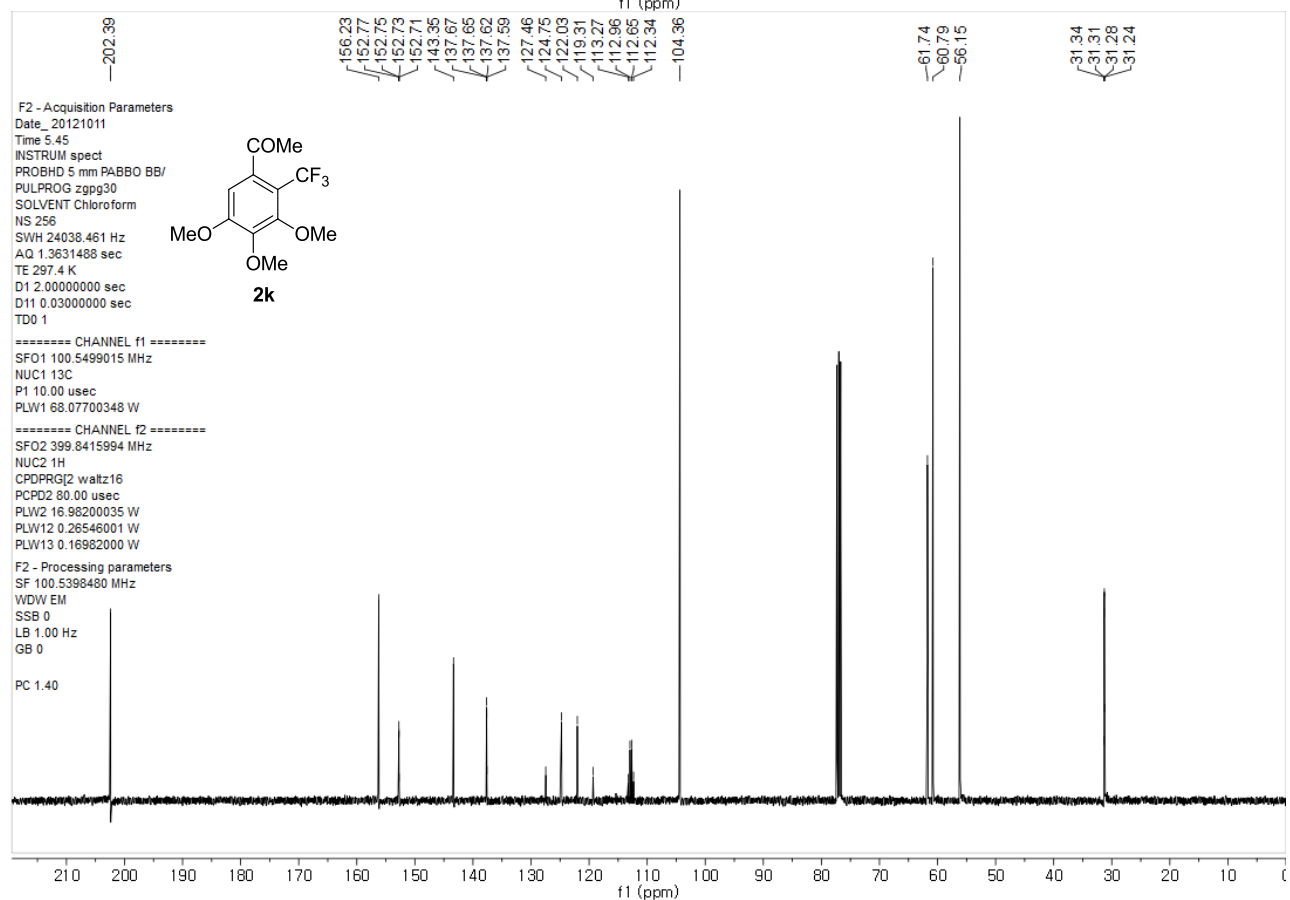

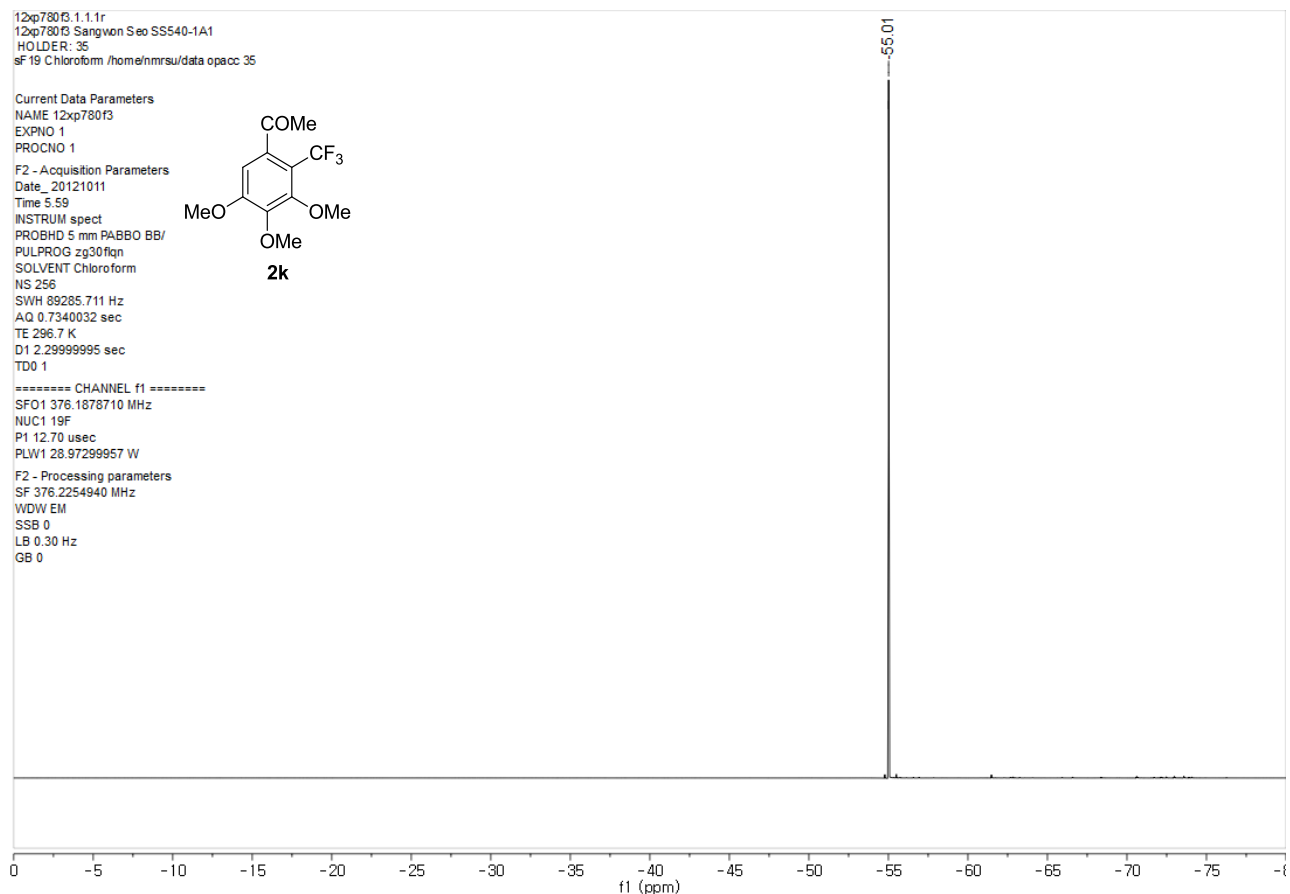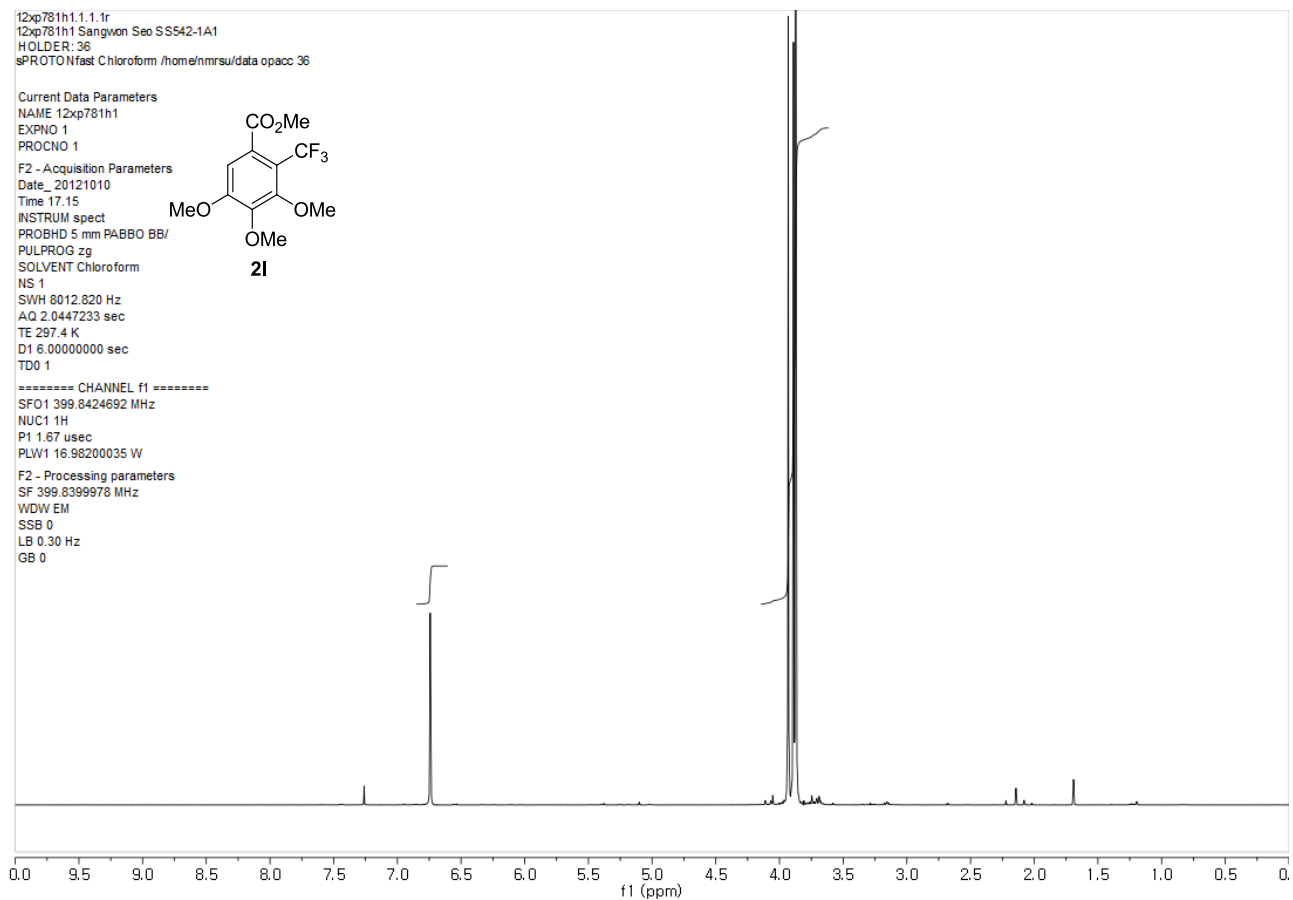

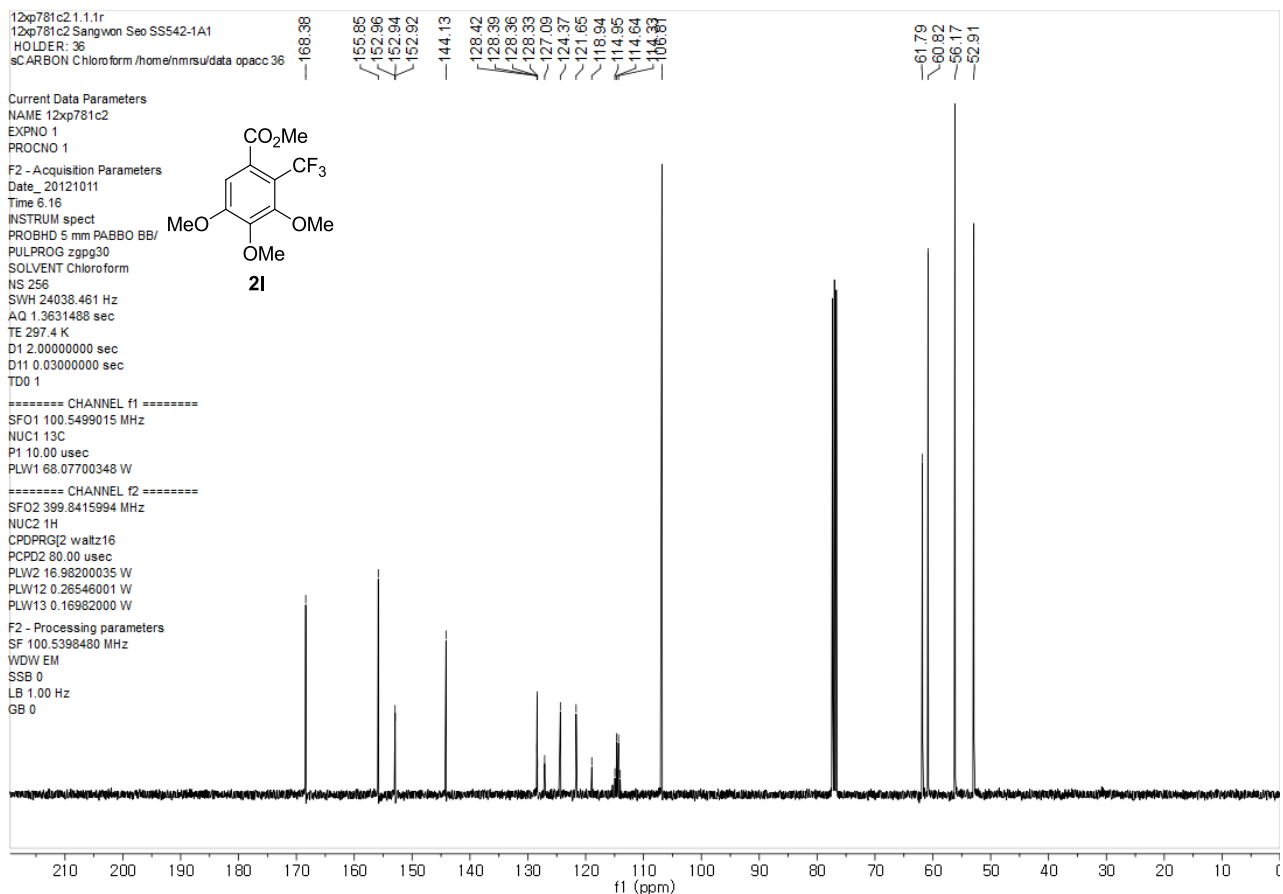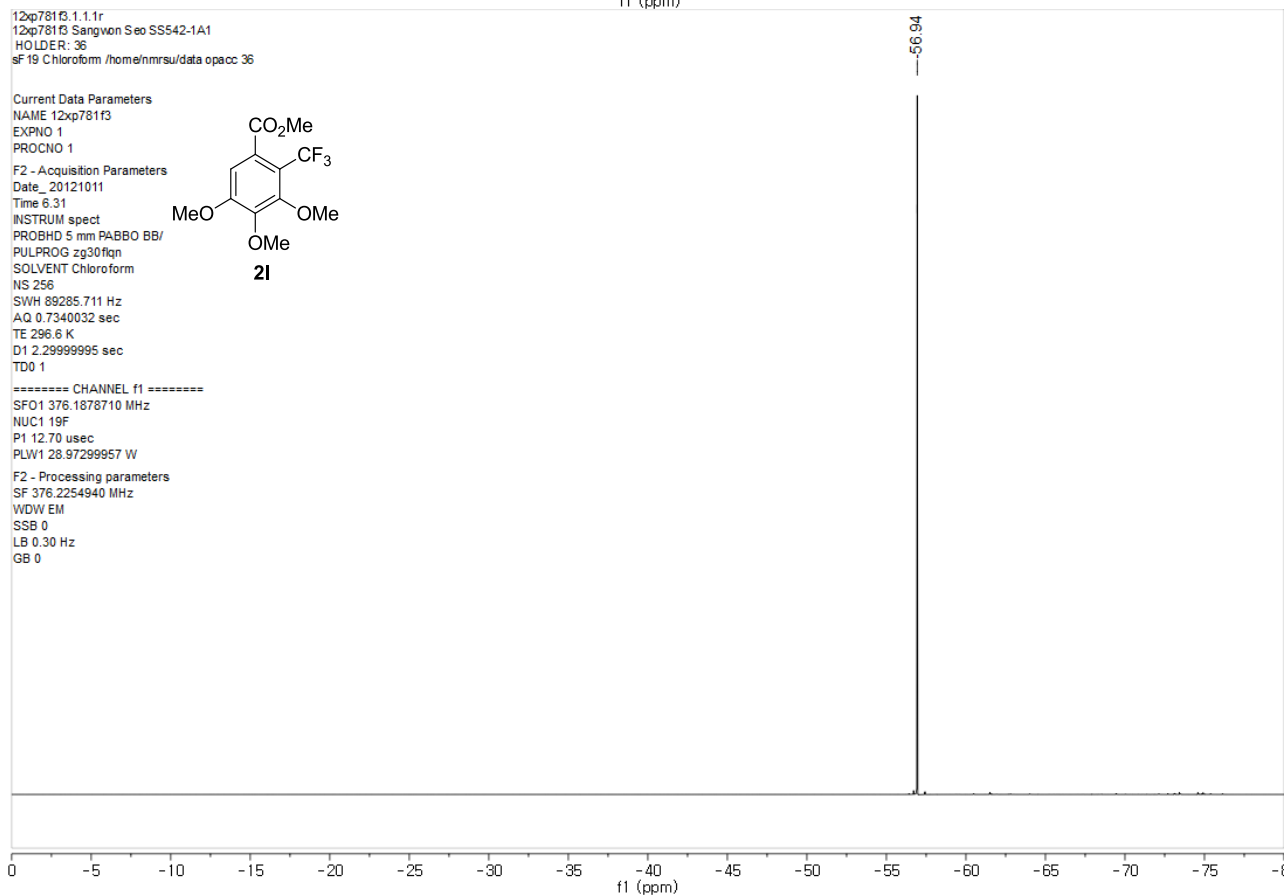

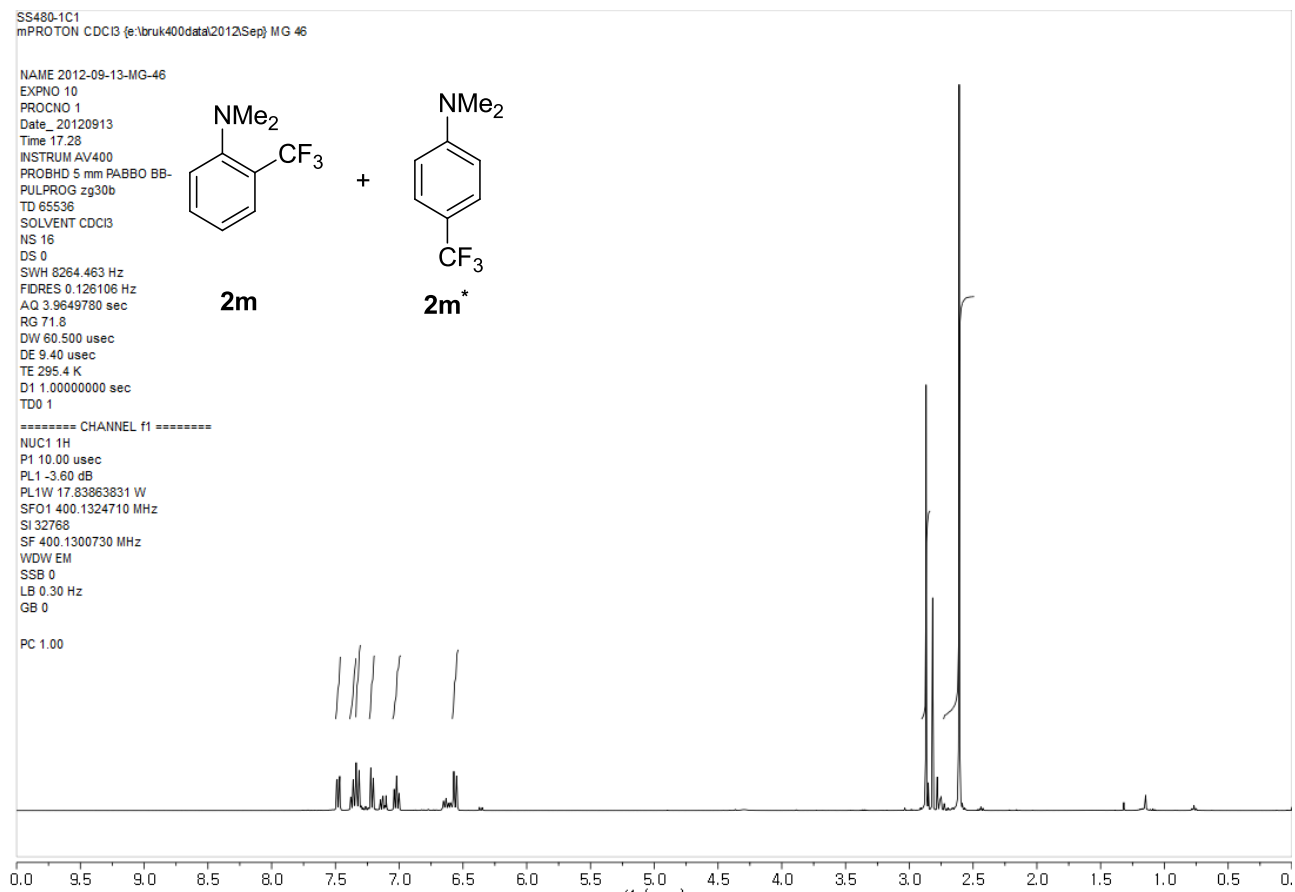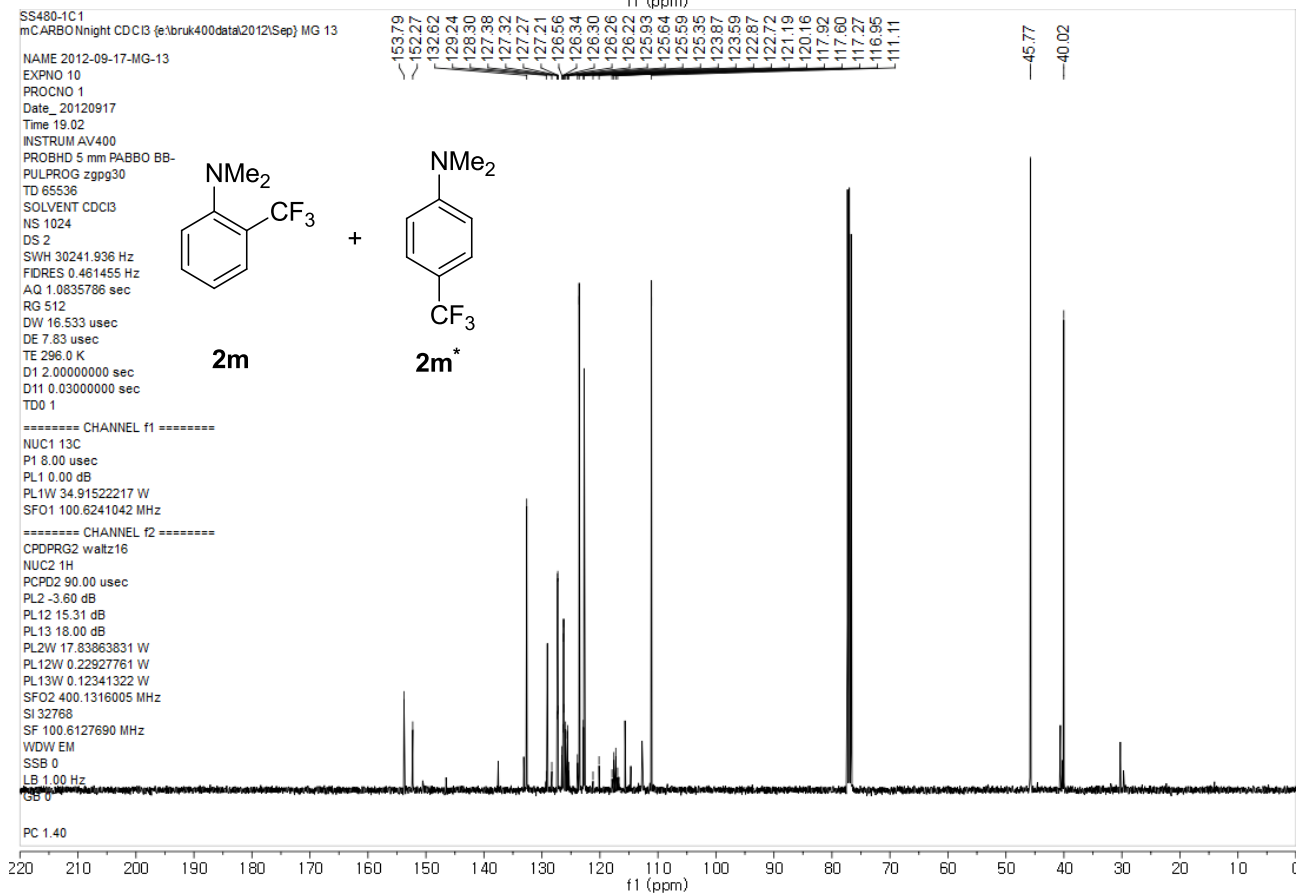

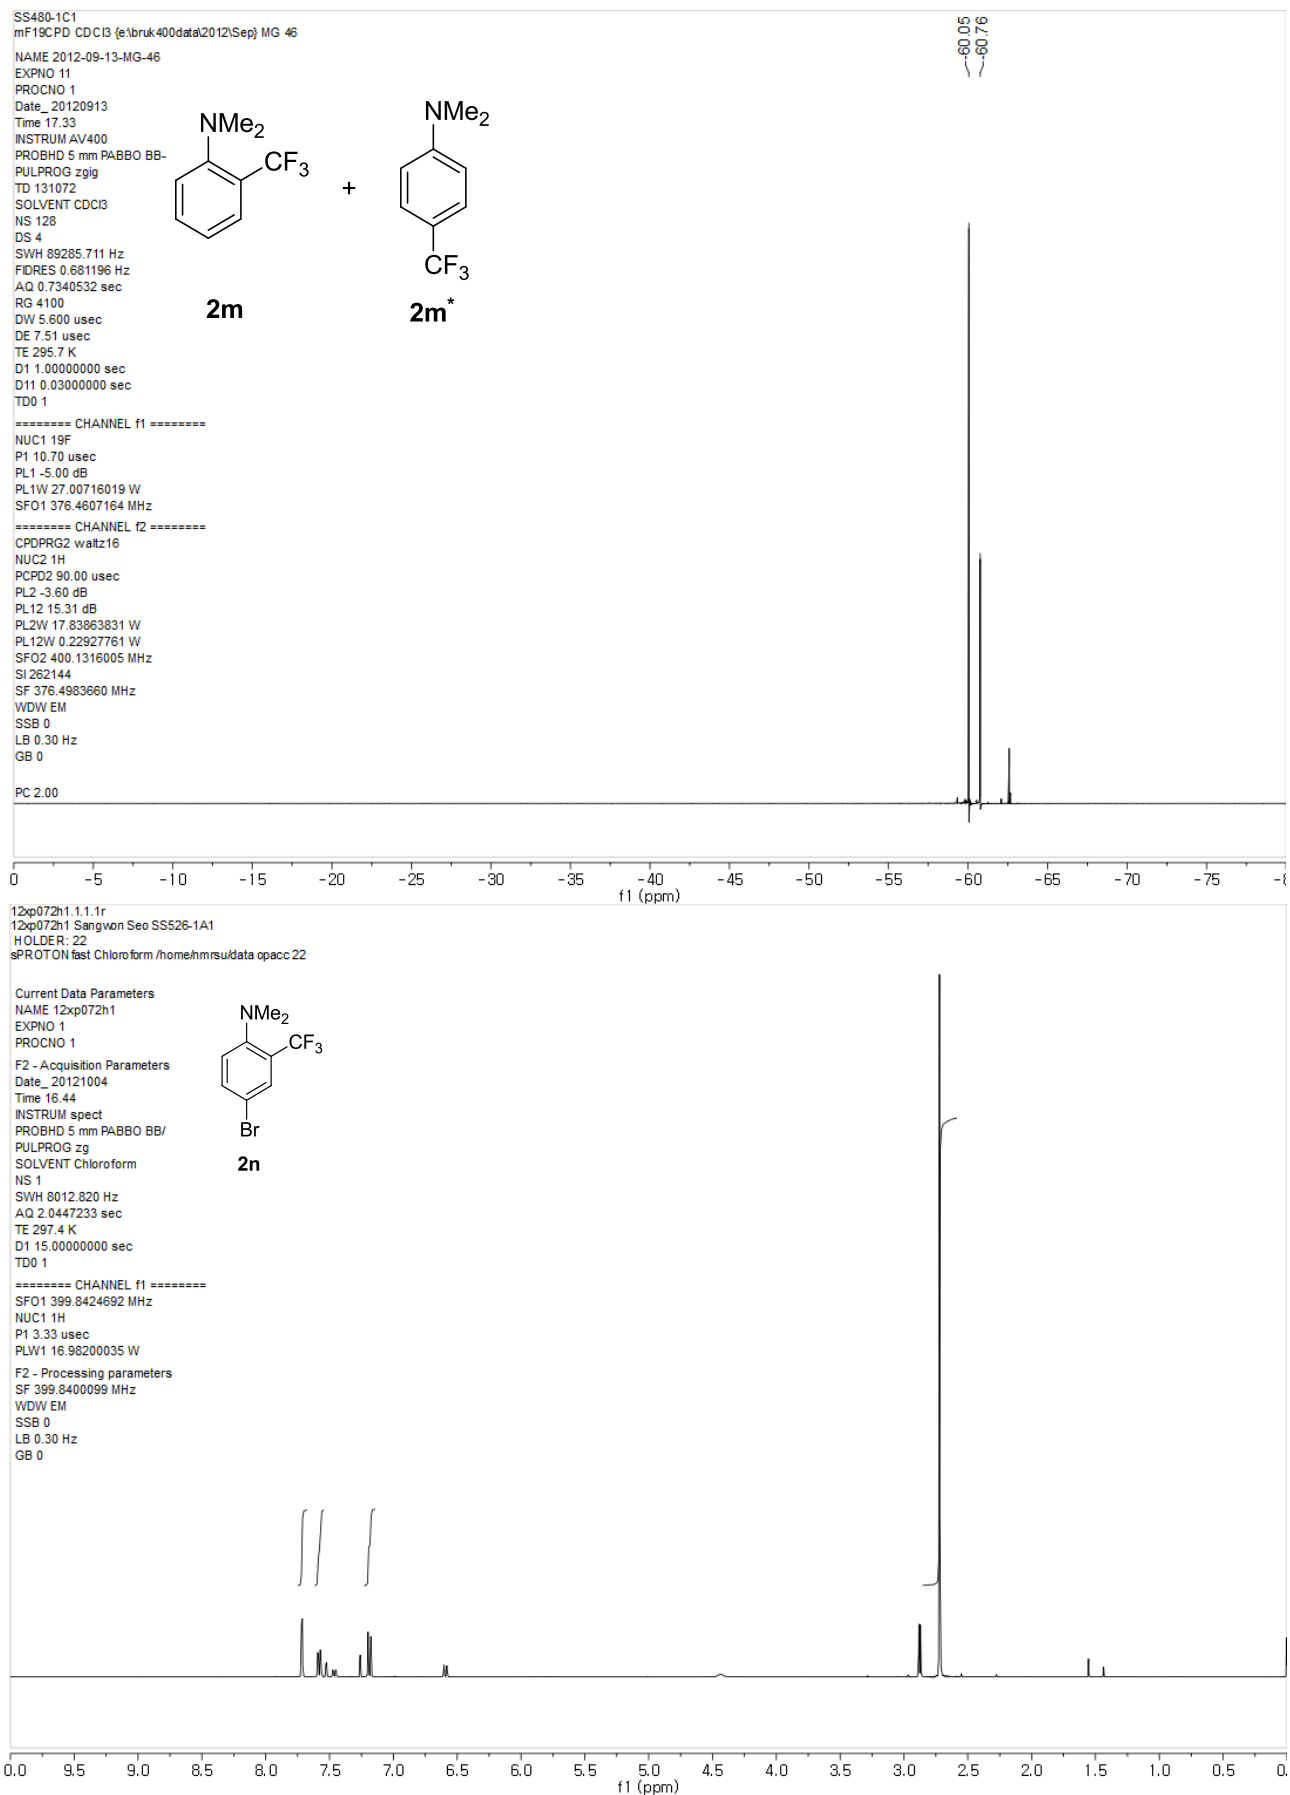



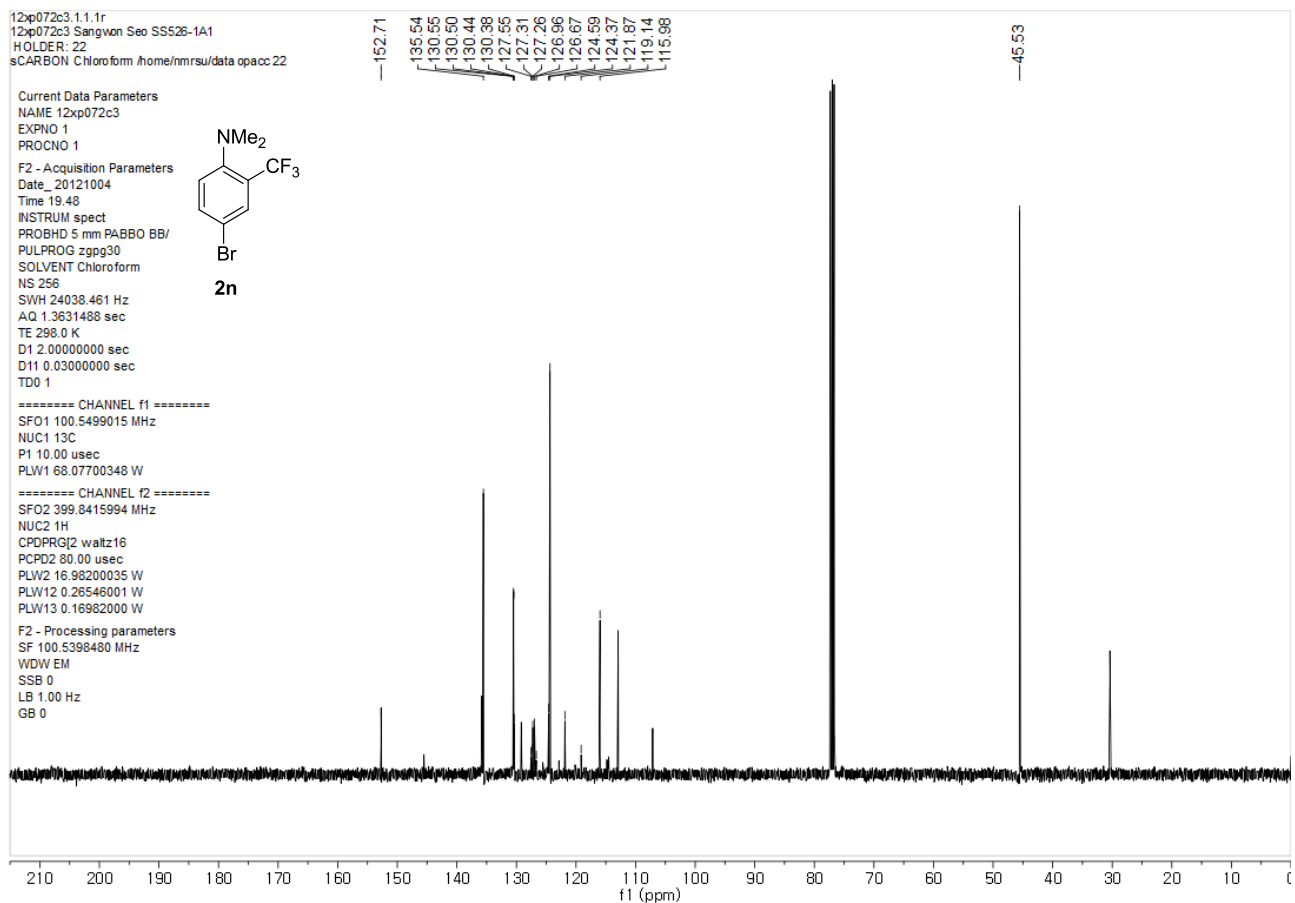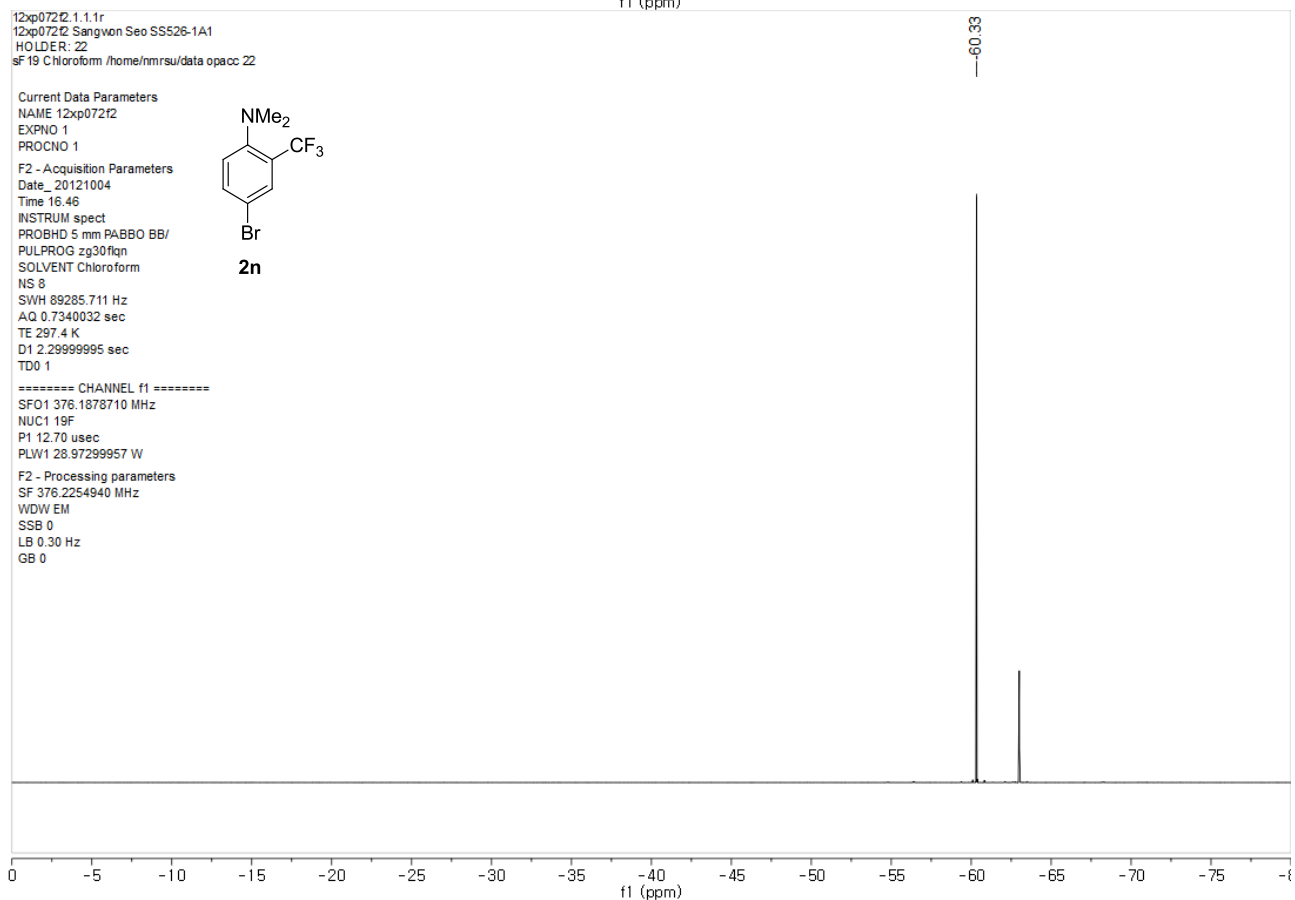

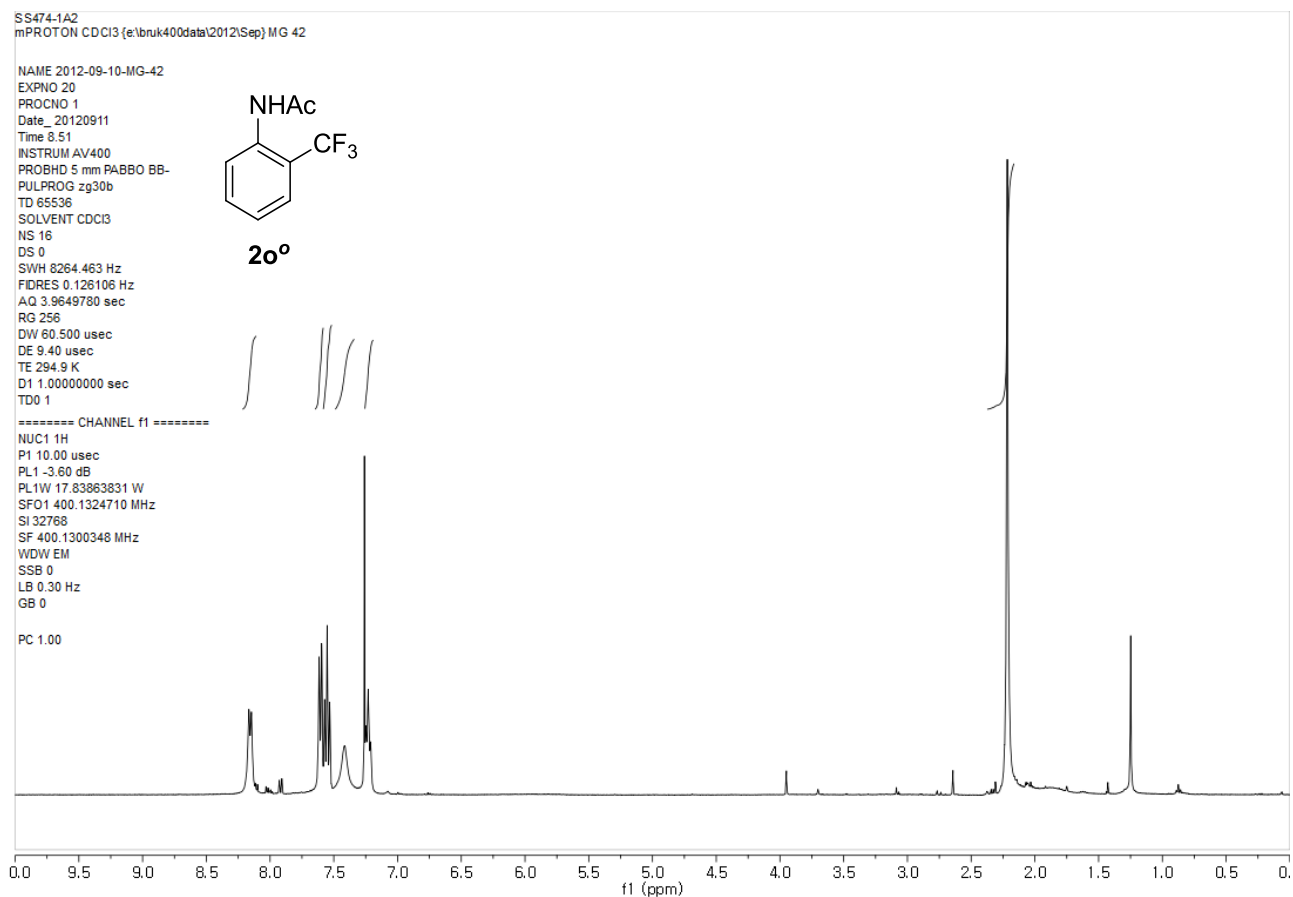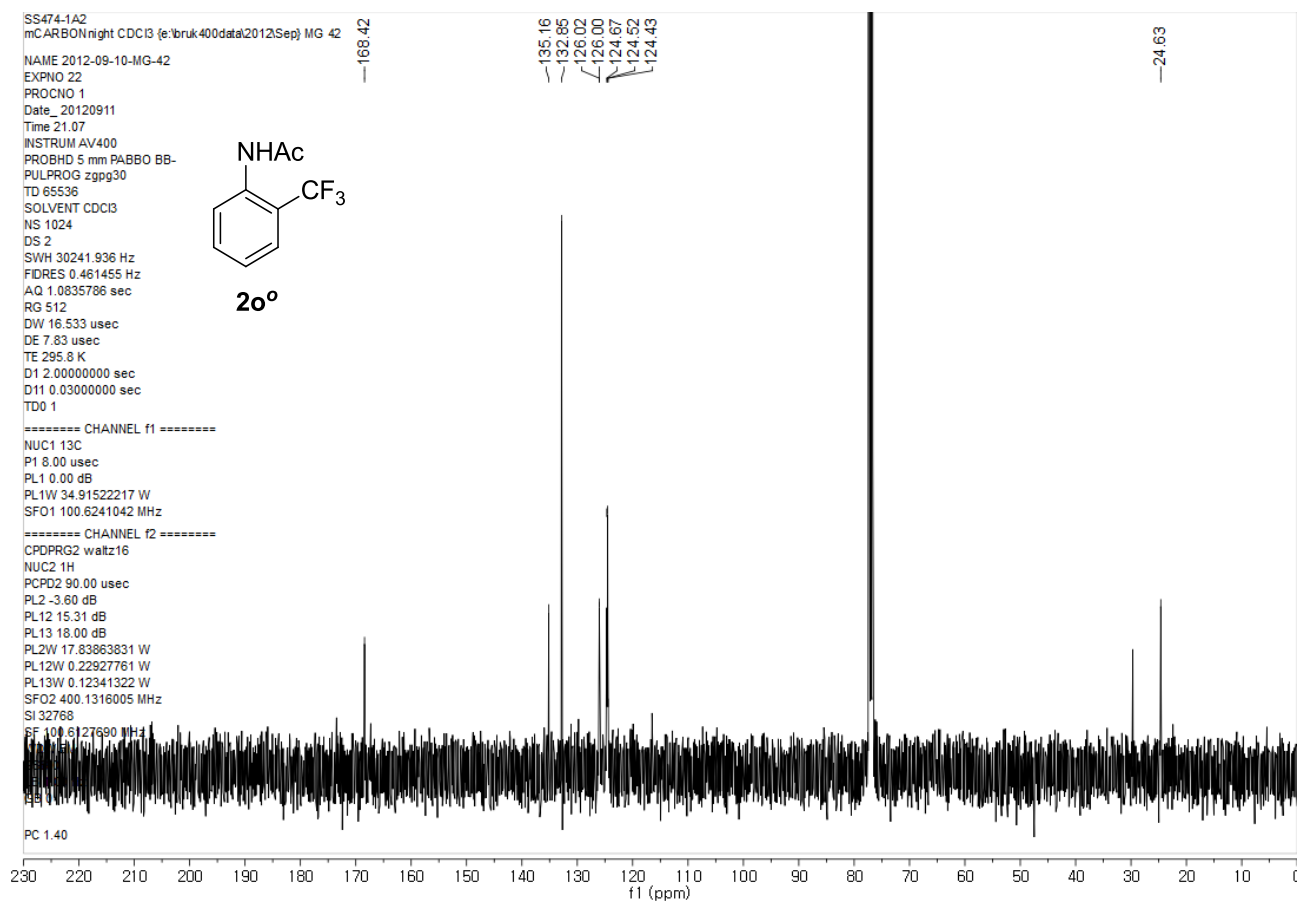

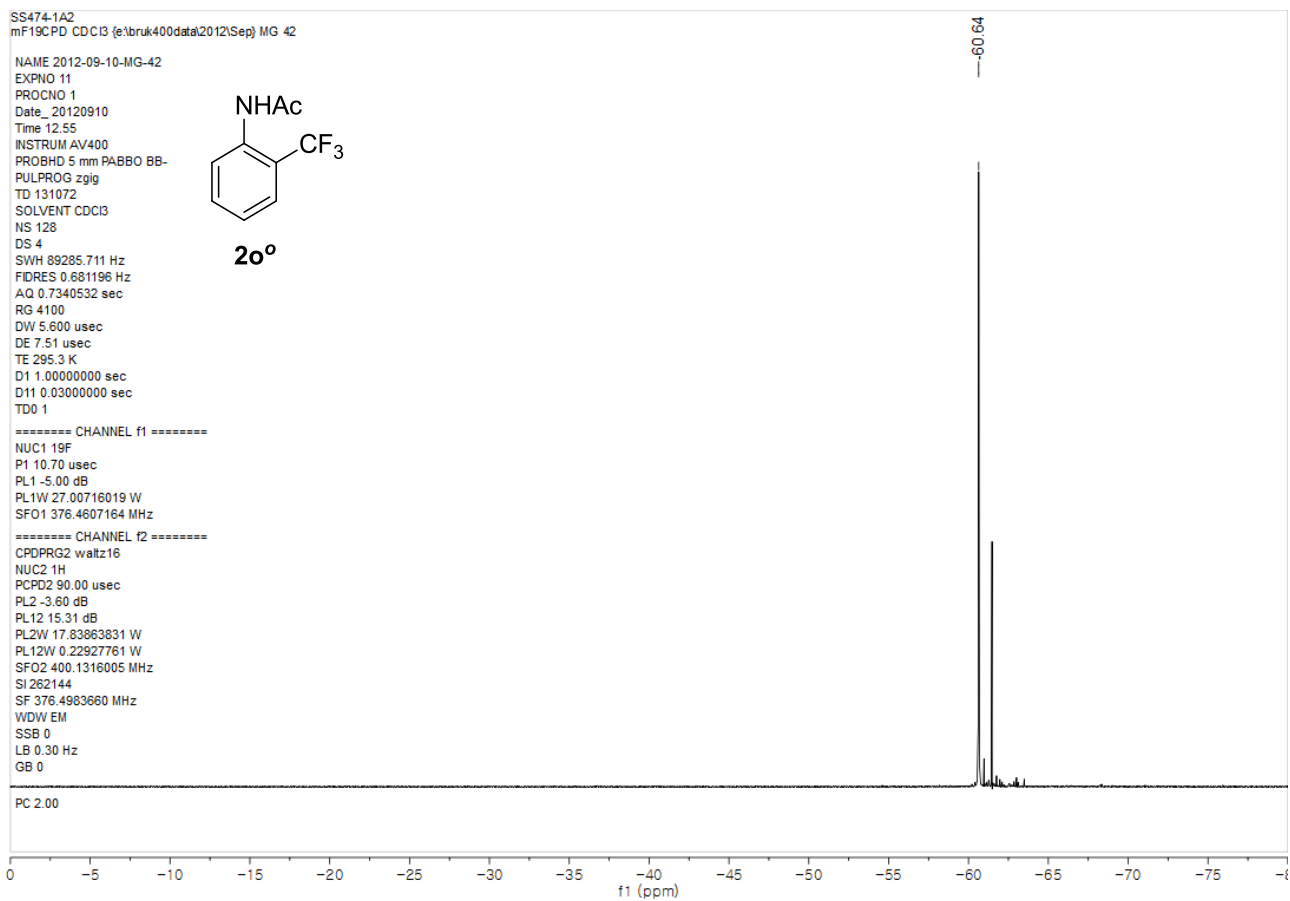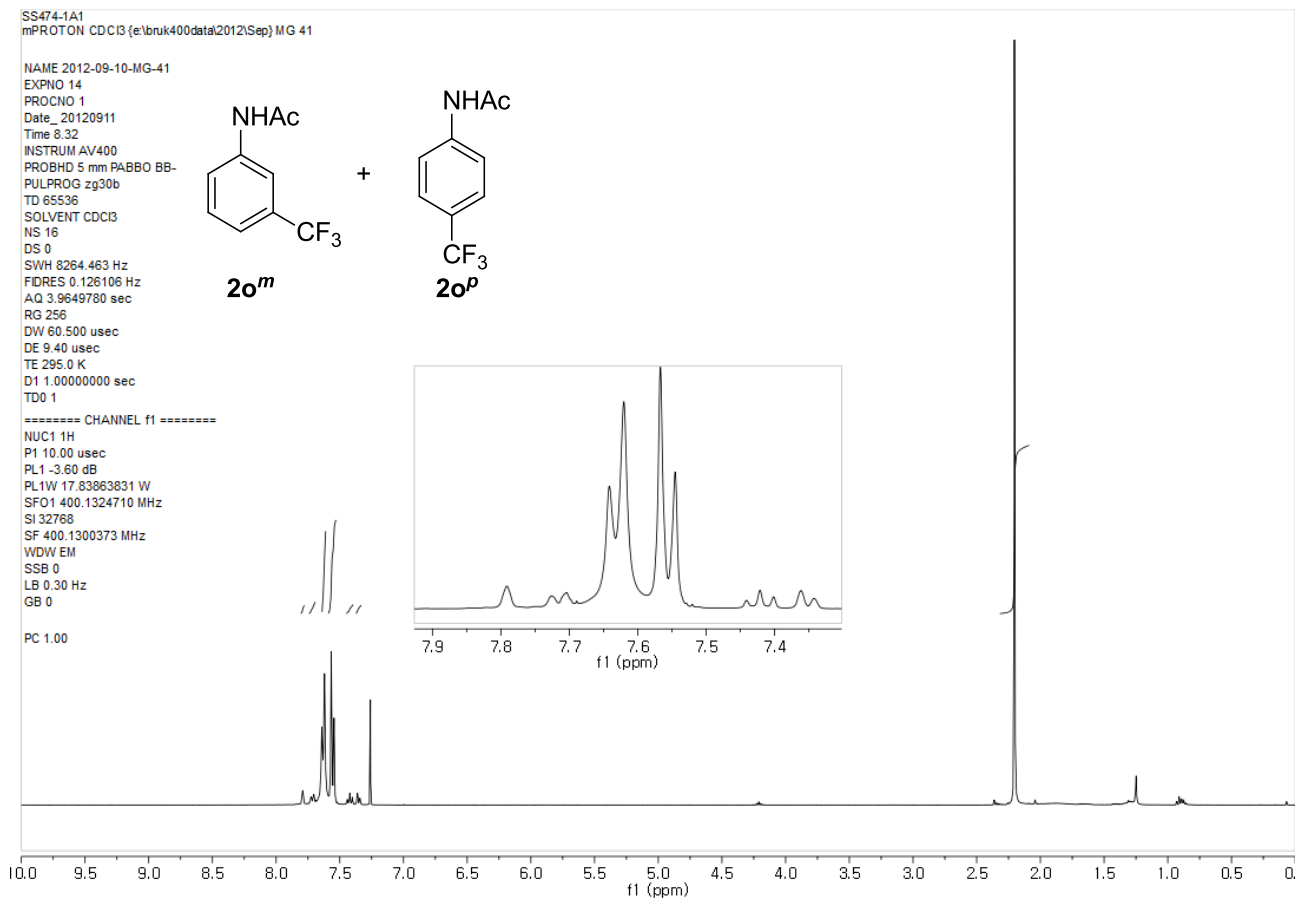

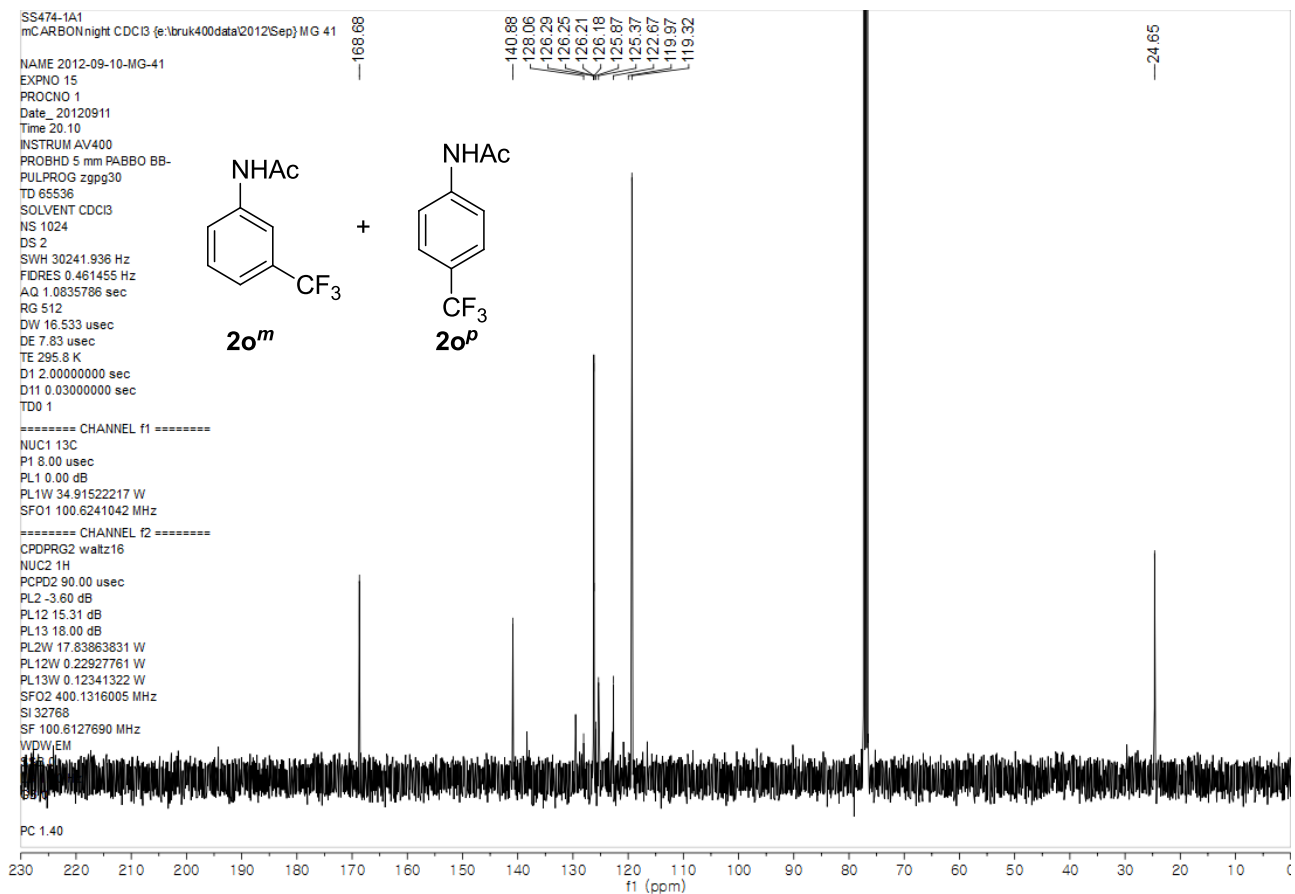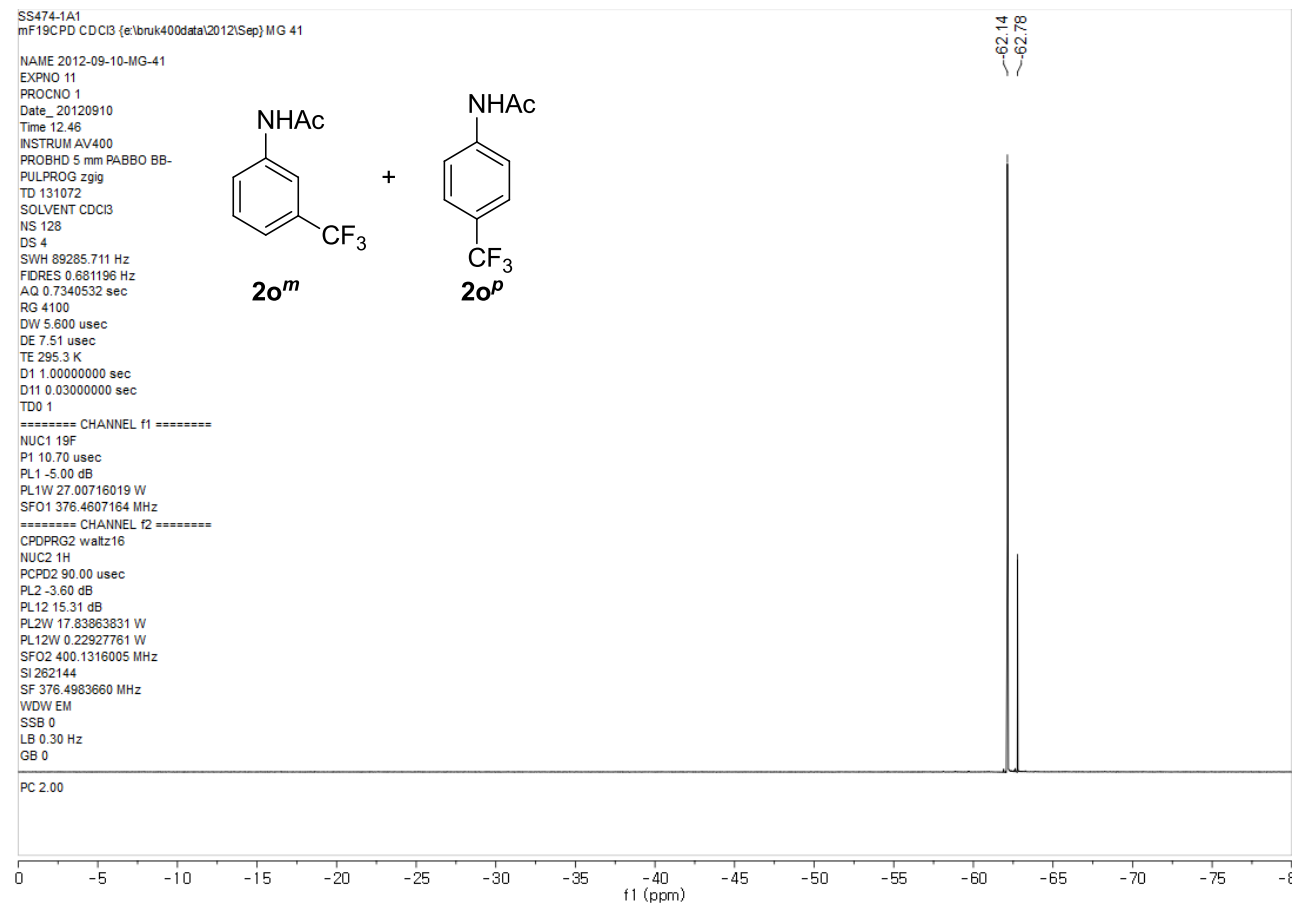

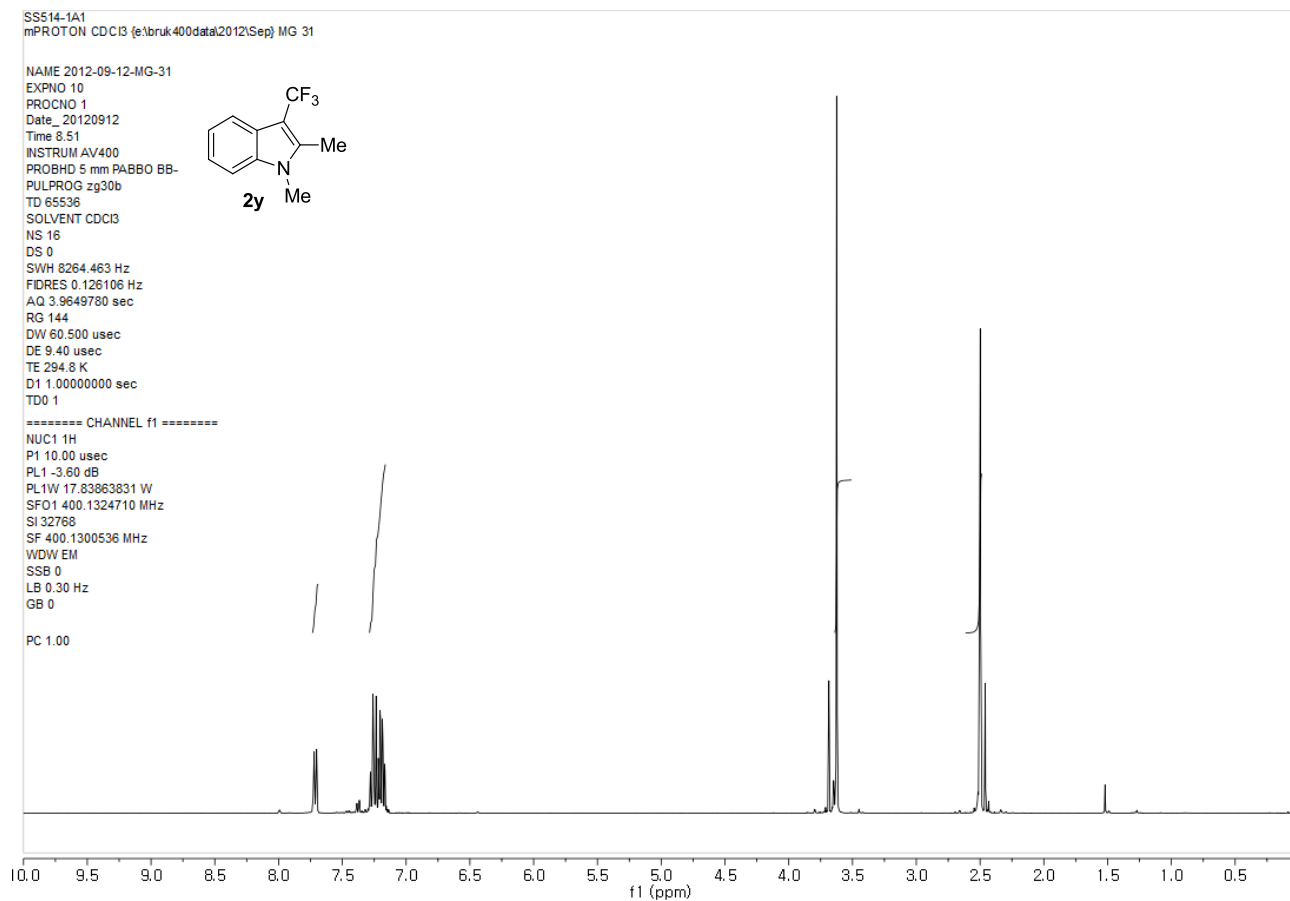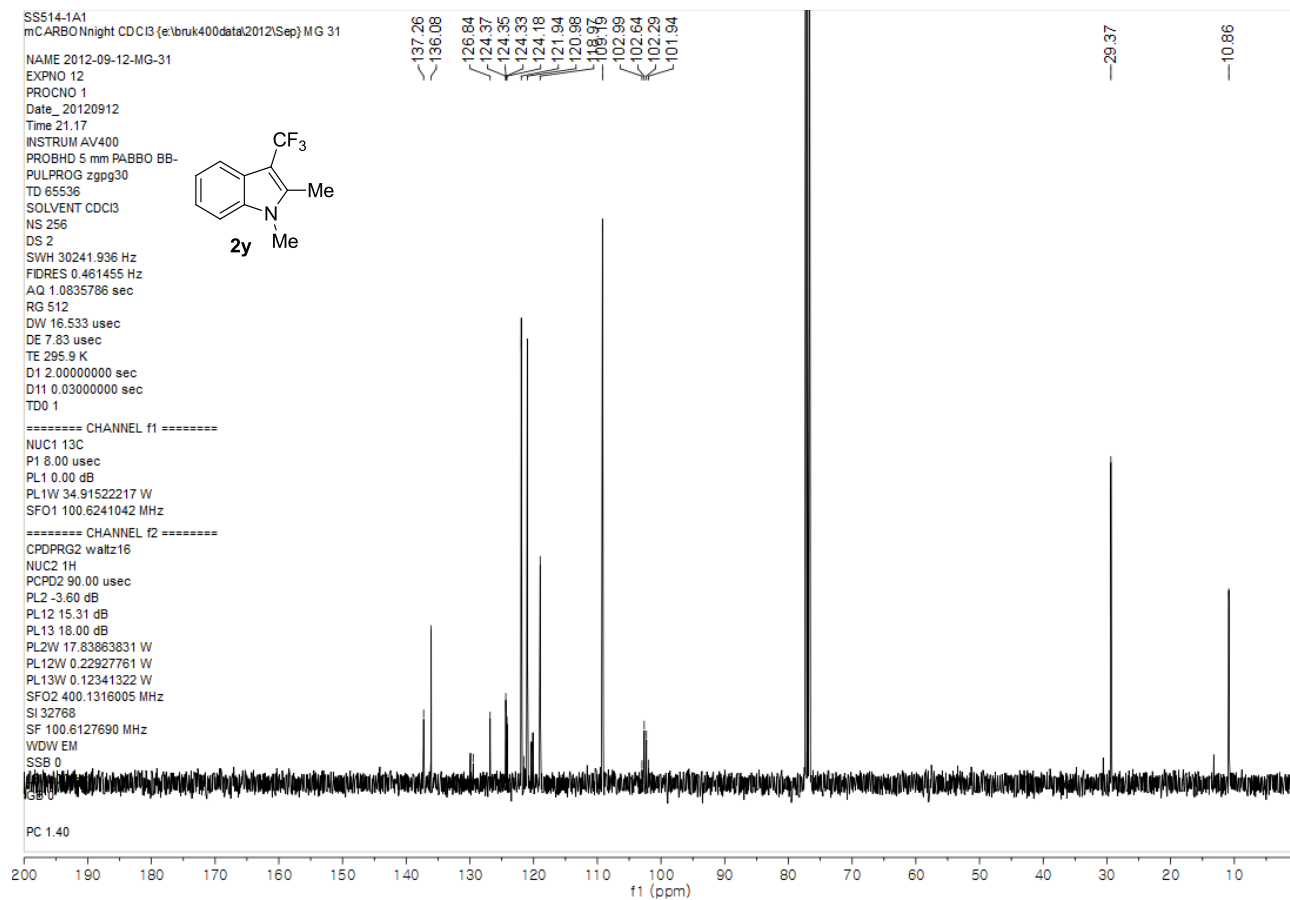

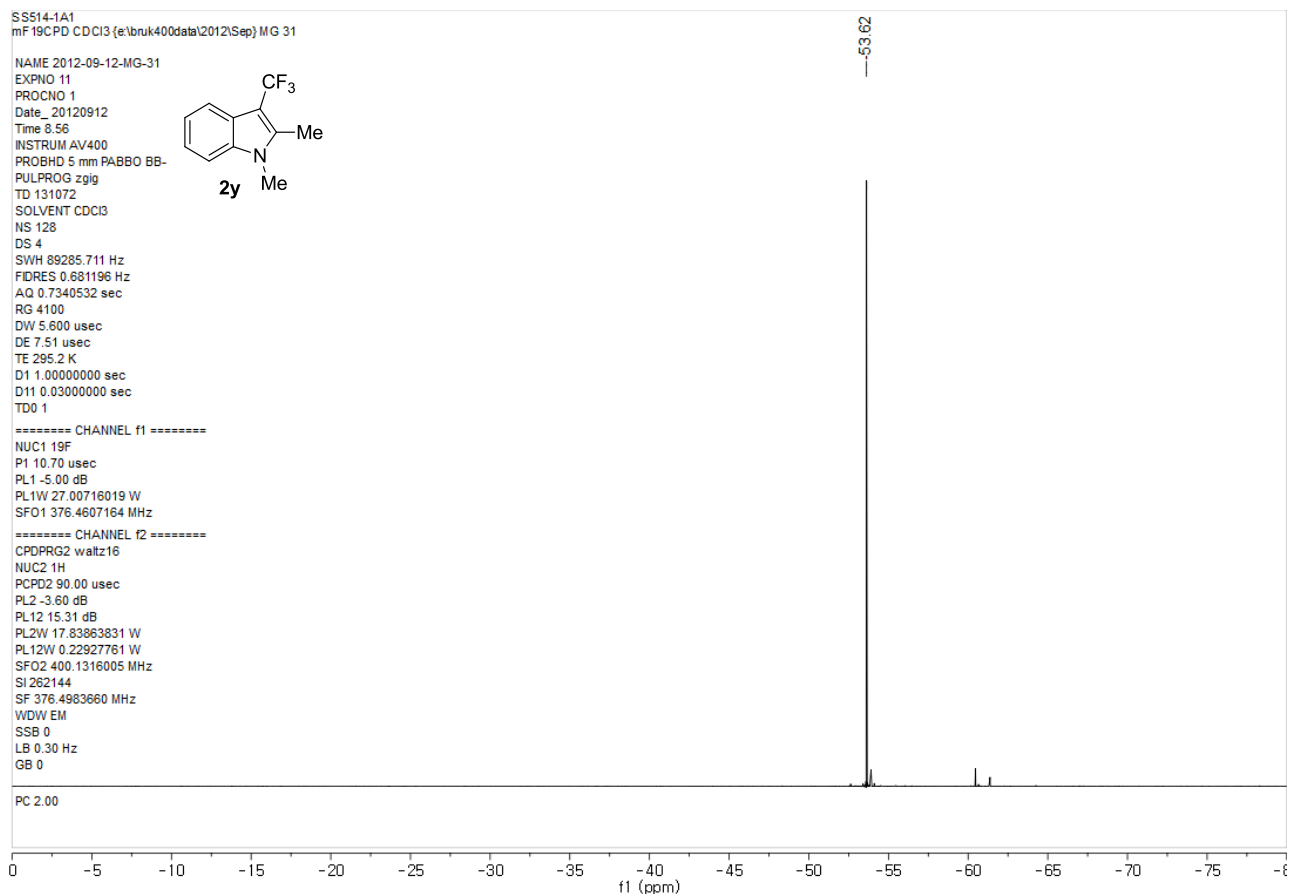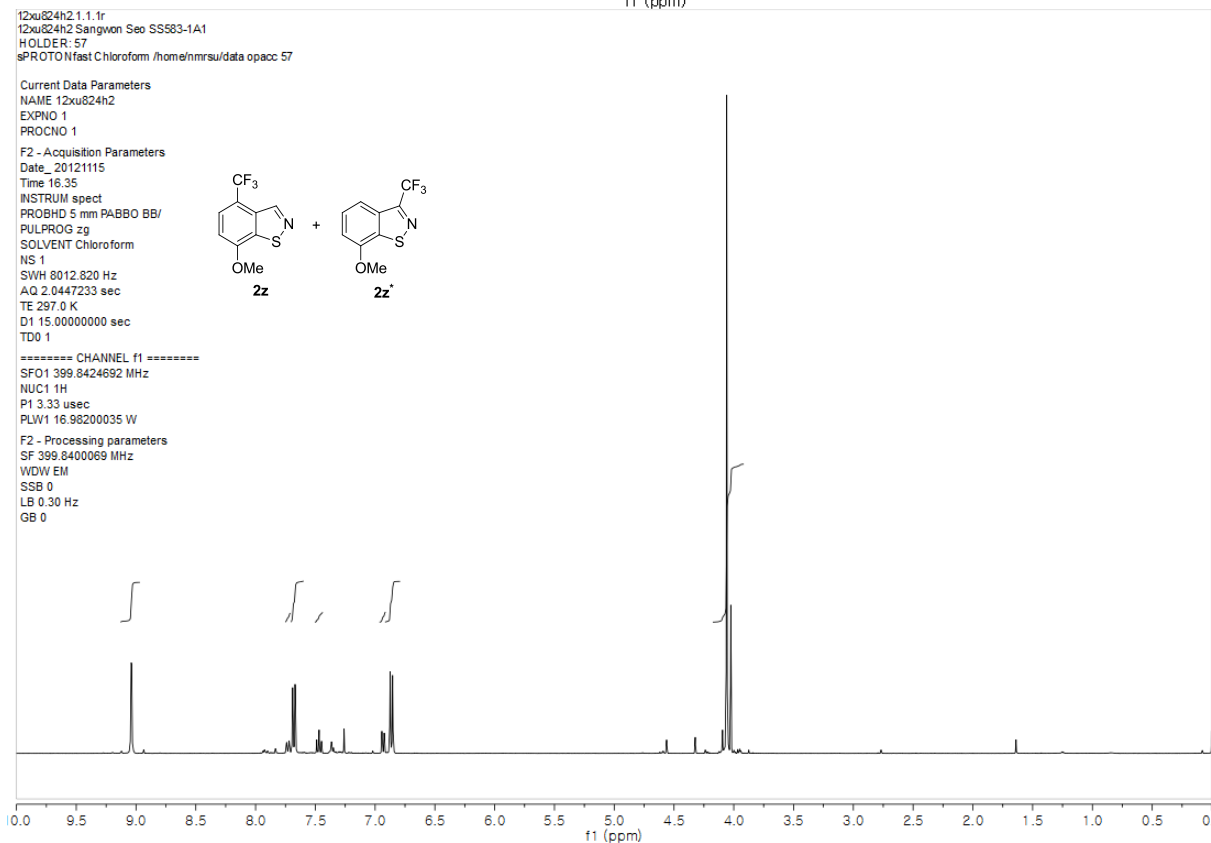

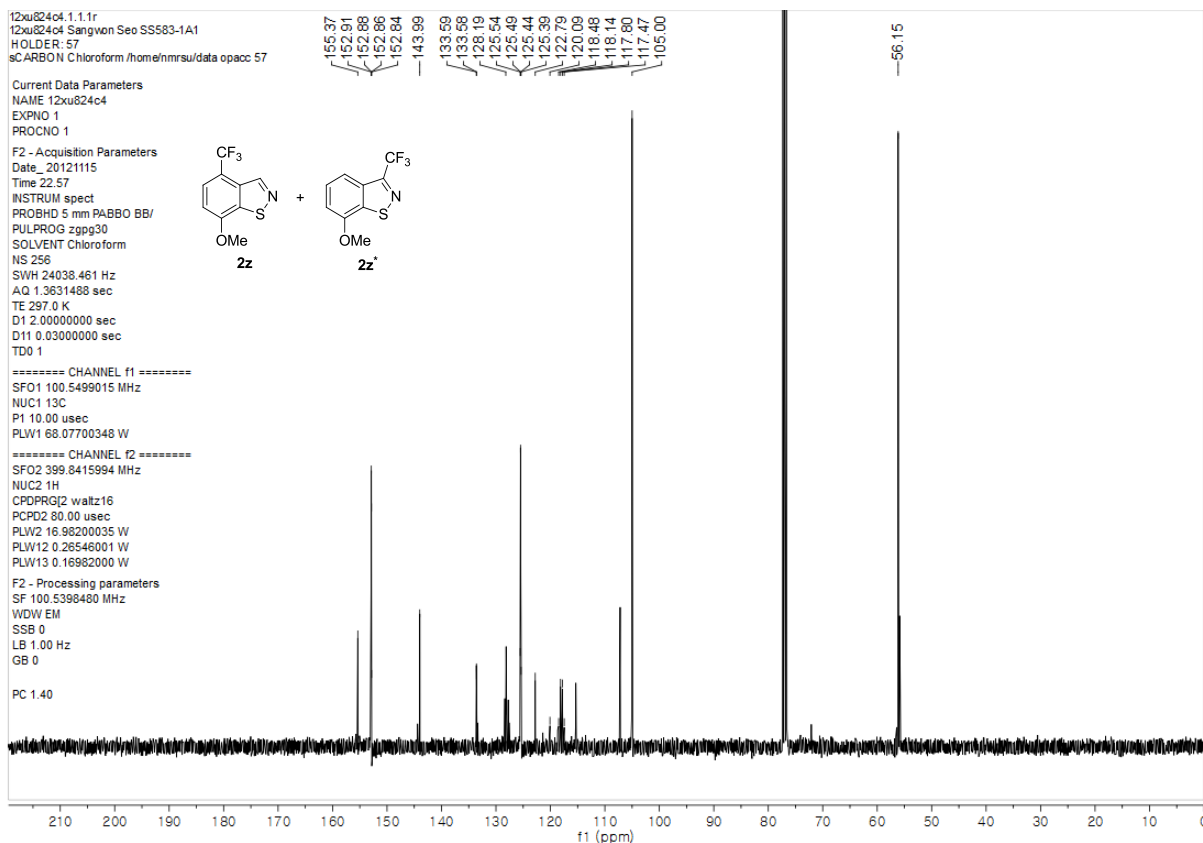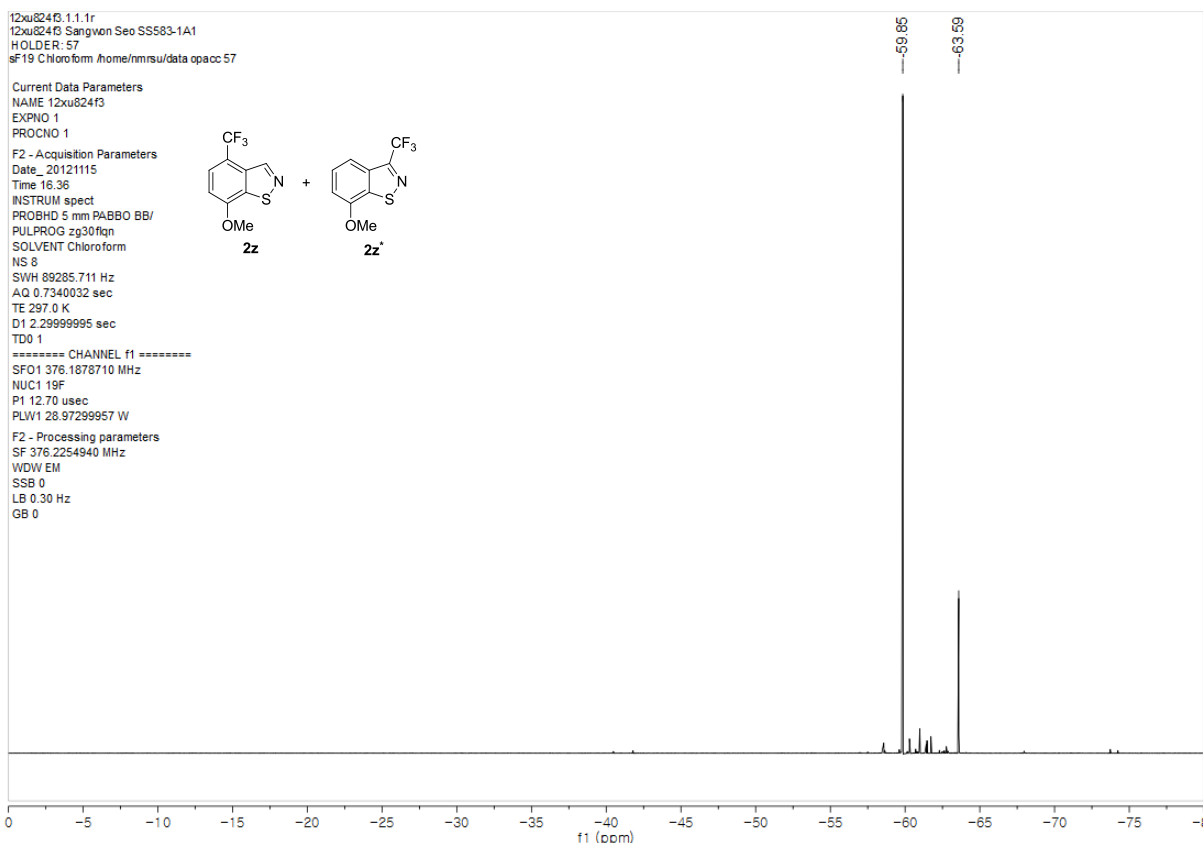

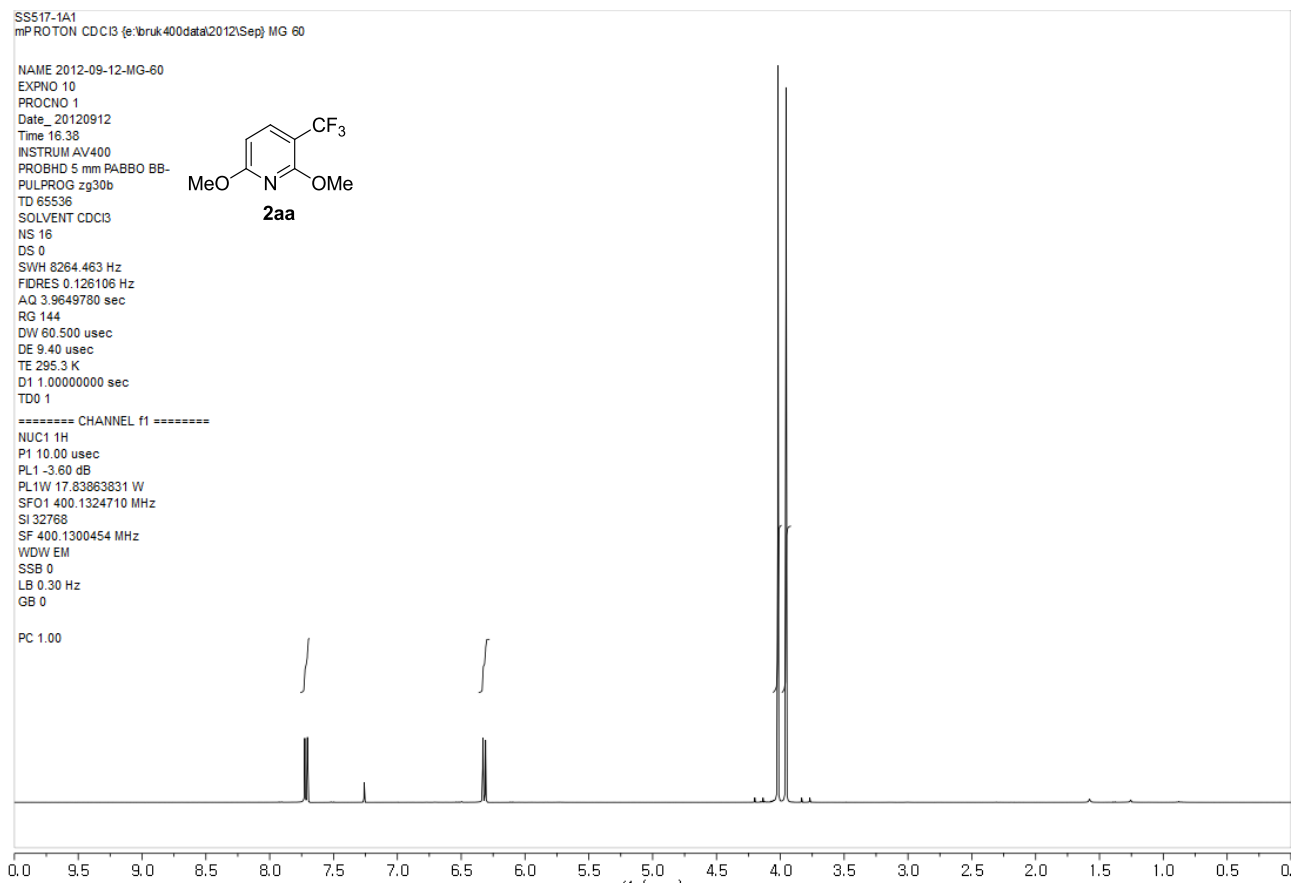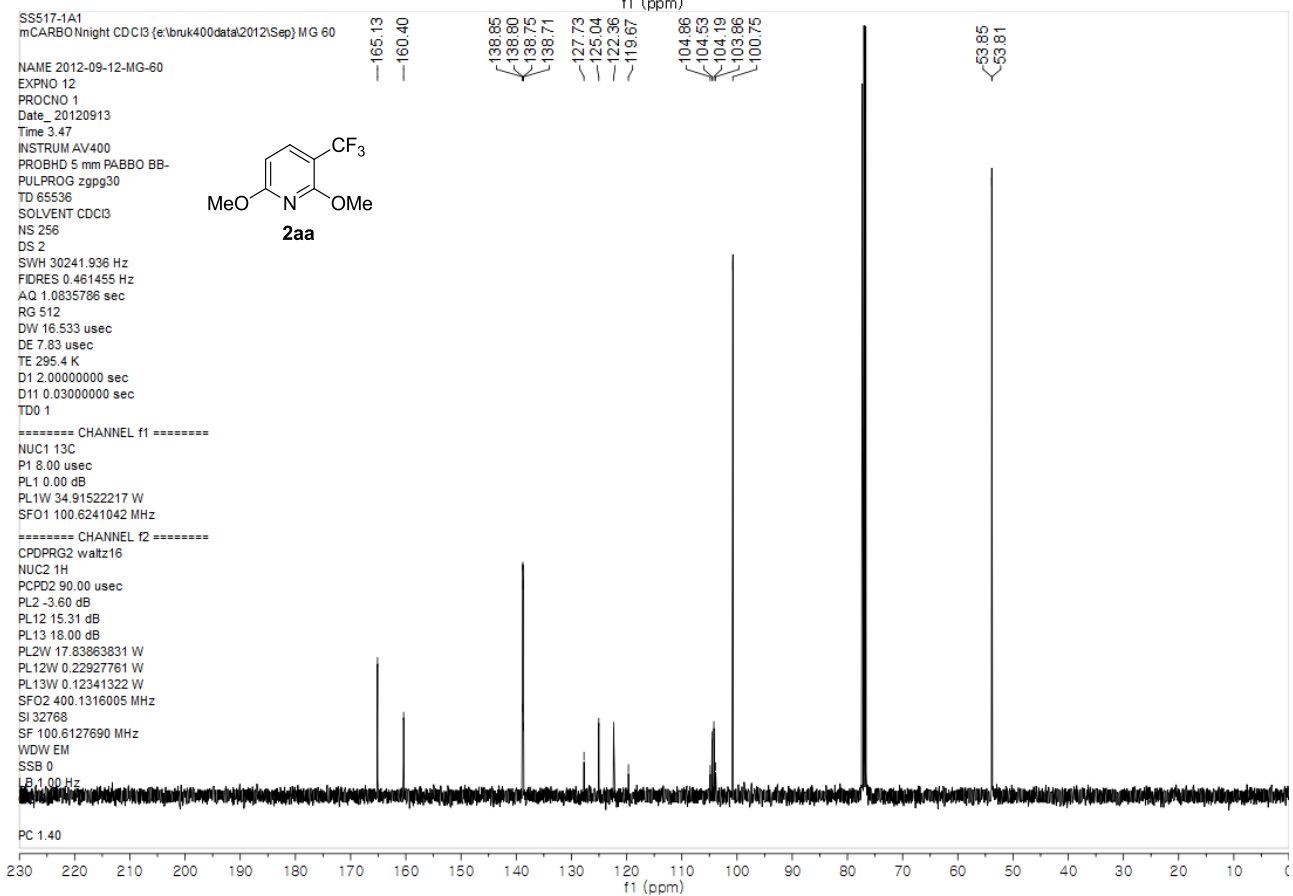



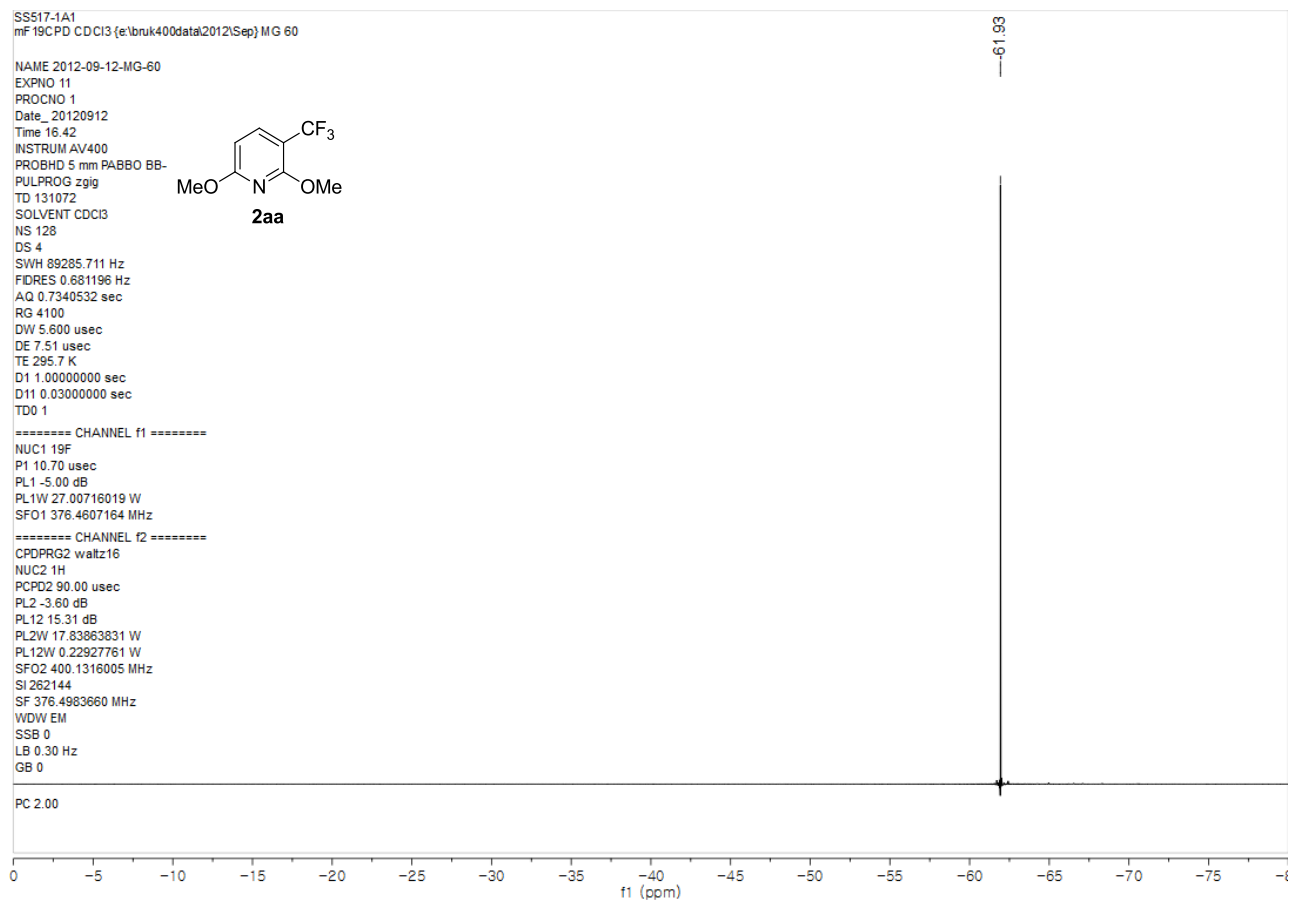

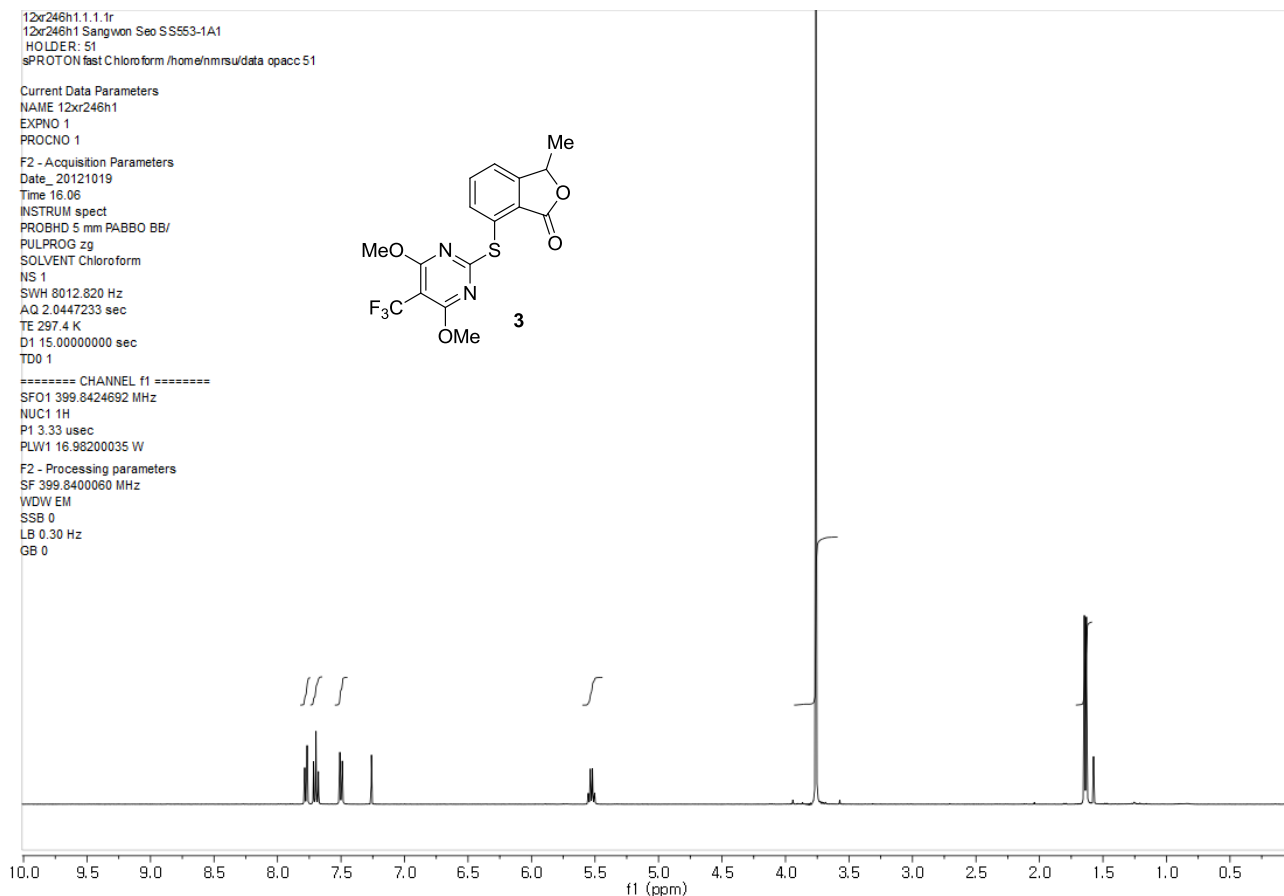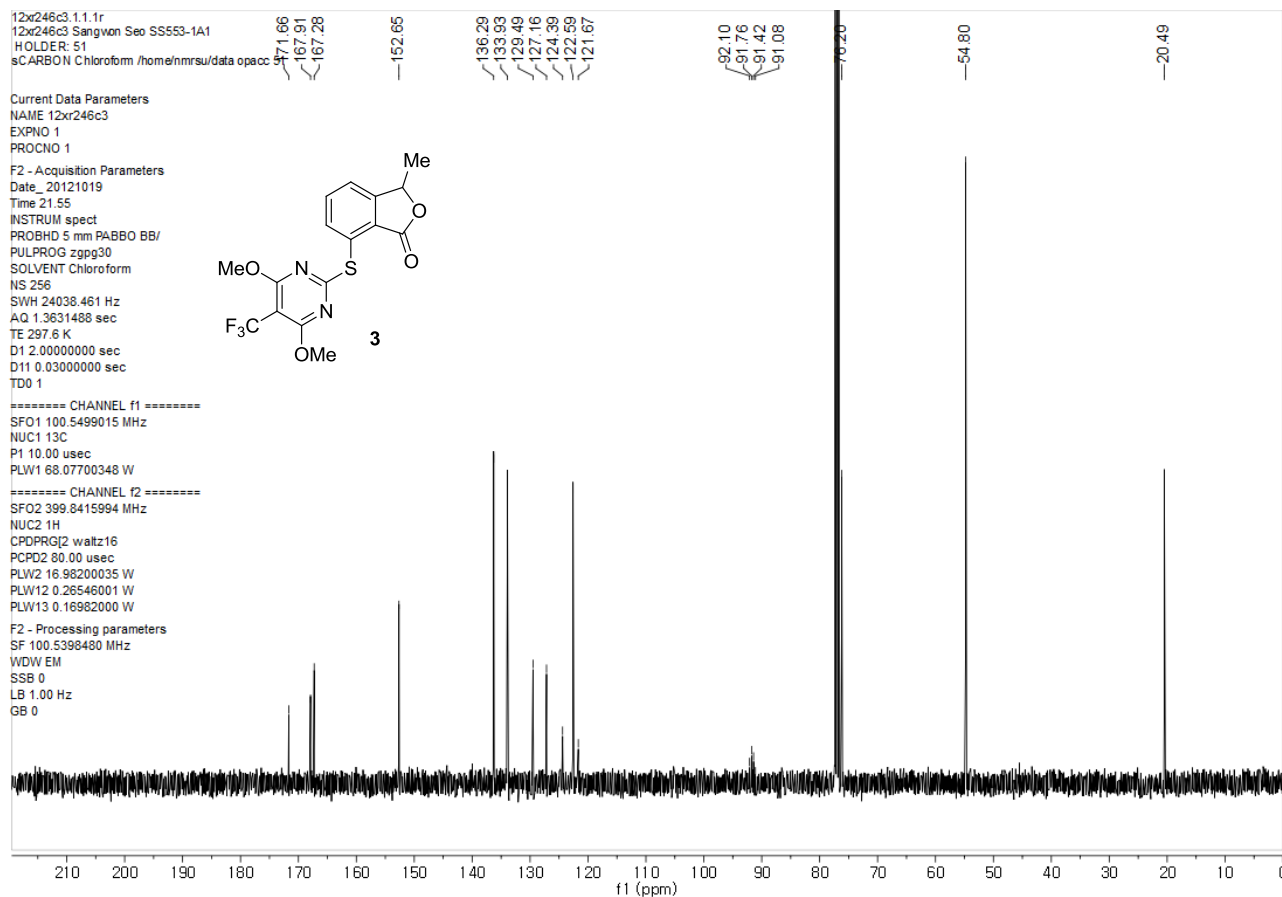

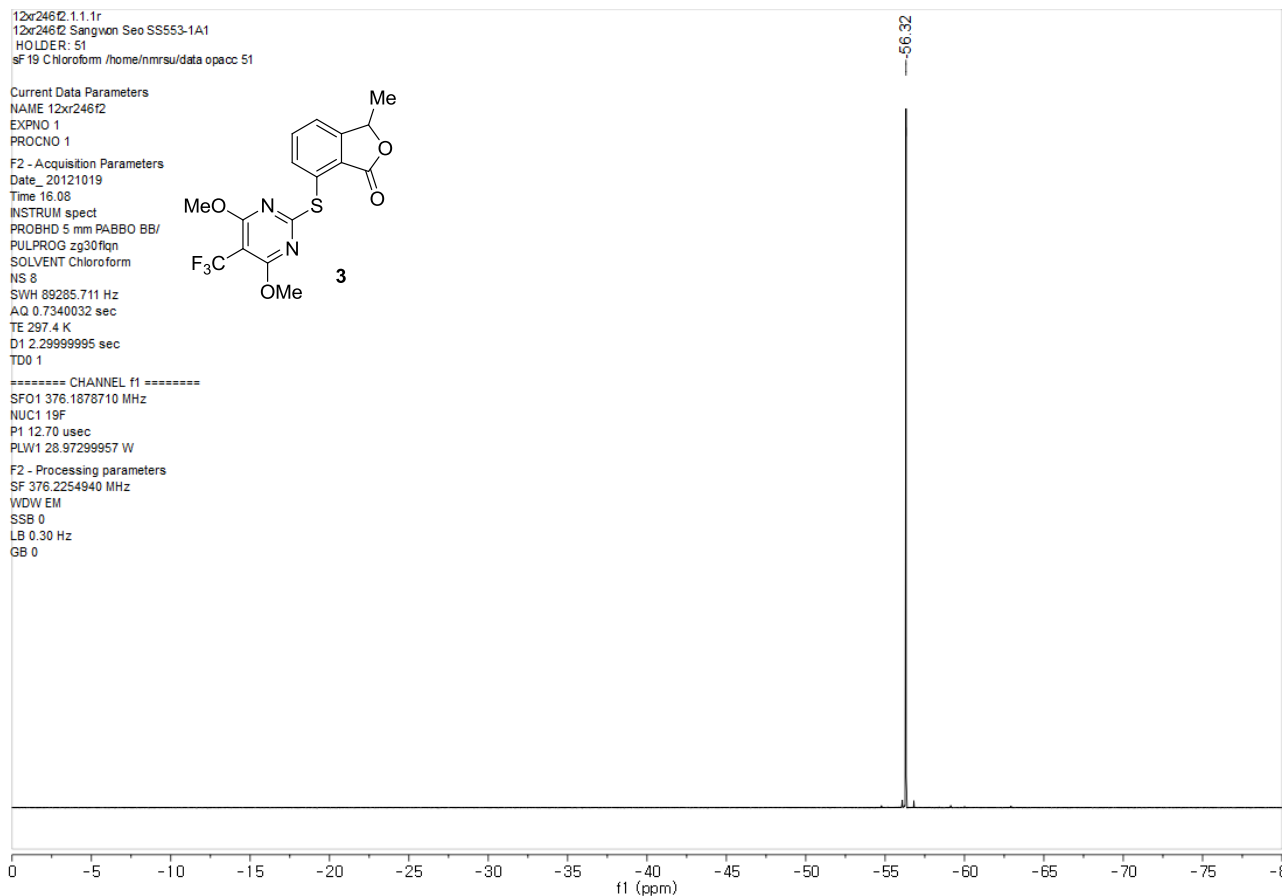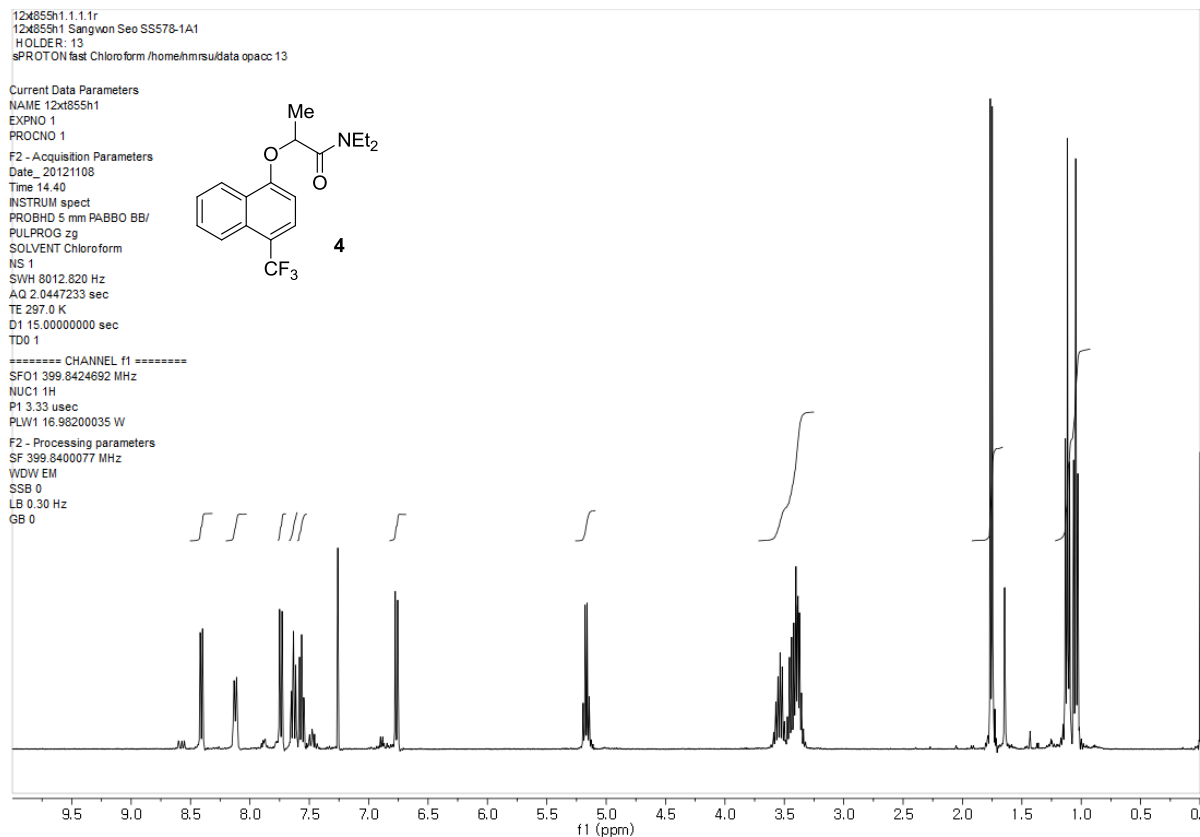

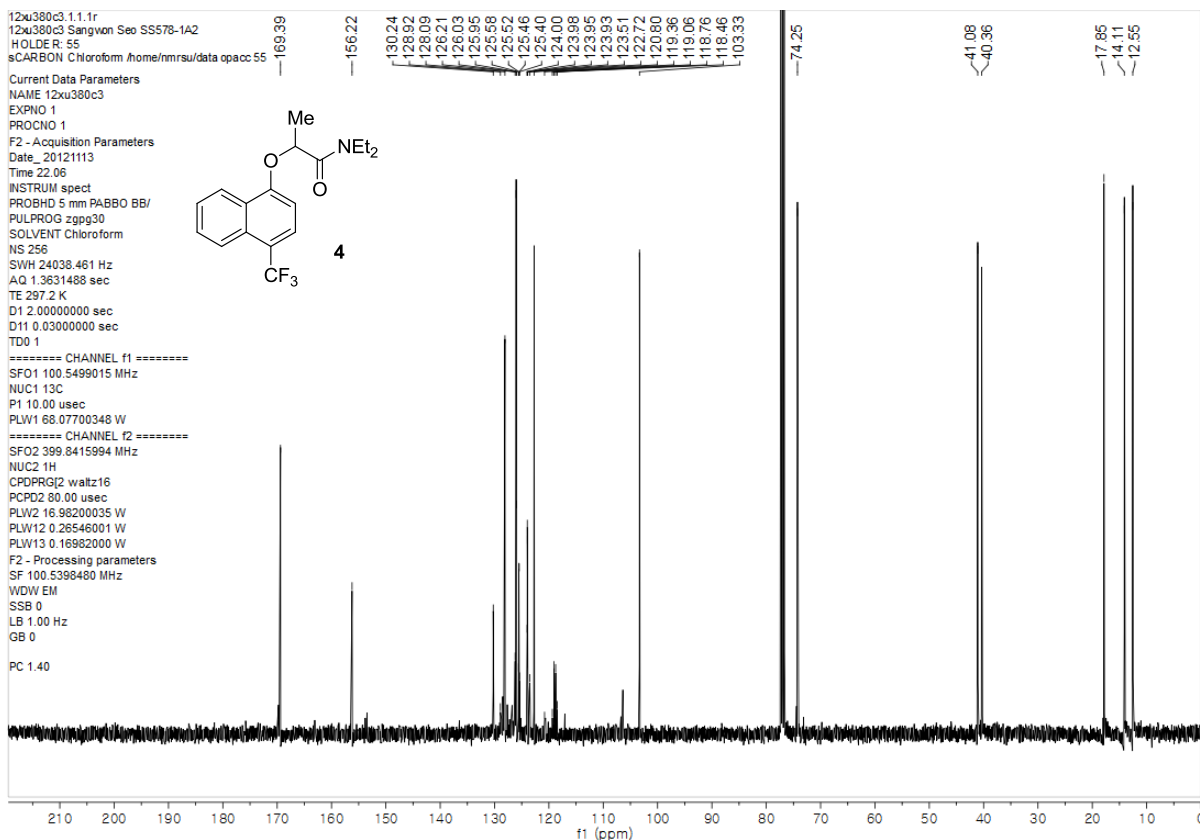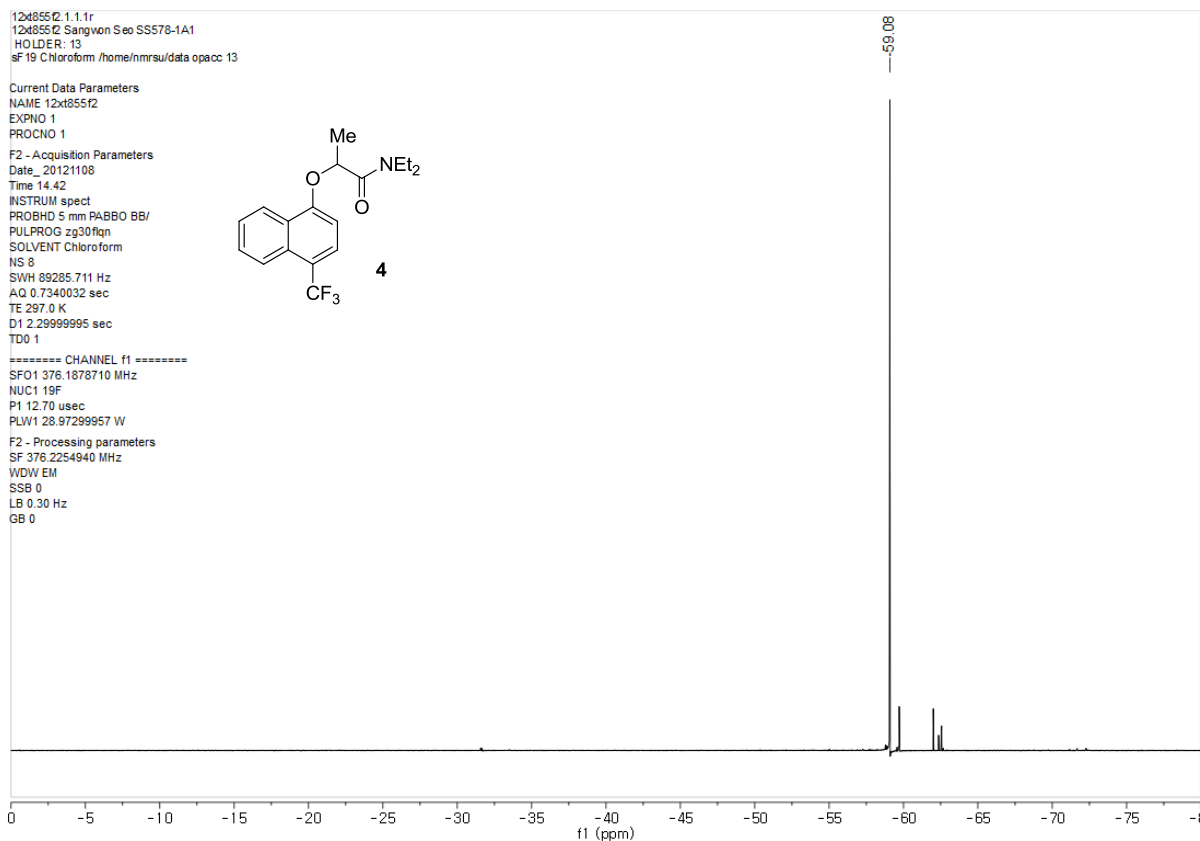

Supplement: c3cc41829d.pdf [file c3cc41829d.pdf]
